# Supplementary material for: Toxicity of the mixture of nanoparticles to algae–bacteria consortia in OECD media
Source: Royal Society of Chemistry journal article supplement (doi:10.1039/d3en00918a), 2024-01-01
Supplement: d3en00918a1.pdf [file d3en00918a1.pdf]

**Toxicity of mixture of nanoparticles on algae-bacteria consortia in OECD media**  
**Samridhi Rana and Arun Kumar<sup>2\*</sup>**

<sup>1</sup>Graduate Student, <sup>2</sup> Professor, Department of Civil Engineering, Indian Institute of Technology, New Delhi, India

\*Corresponding Author ([arunku@civil.iitd.ac.in](mailto:arunku@civil.iitd.ac.in); +91-11-2659-1166 (Phone); +91-11-2658-1117 (Fax))

**Appendix A: Previous studies**

**Table A.1: Various studies showing algae-bacteria consortia at different water matrix.**

| Reference              | Algae/bacteria Information                                                                                                                                   | Matrix      | Findings                                                                                                                                                | Toxicants   | Parameters observed                                   | Comparison with the present study                                                        | Remarks/ Limitations                                  |
|------------------------|--------------------------------------------------------------------------------------------------------------------------------------------------------------|-------------|---------------------------------------------------------------------------------------------------------------------------------------------------------|-------------|-------------------------------------------------------|------------------------------------------------------------------------------------------|-------------------------------------------------------|
| Han et al. (2016)      | <b>Bacteria:</b> <i>Muricauda sp.</i> <b>Axenic microalga:</b> <i>Tetraselmis chunii</i> , <i>Cylindrotheca fusiformis</i> & <i>Nannochloropsis gaditana</i> | Wastewater  | Microalgae-bacteria co-cultures effective strategy for microalgal cultivation under mixotrophic conditions. Algal cell density increases with bacteria. | Not present | Growth curve, algae-bacteria ratio, plating           | Growth profile, chl a, chl b, biomass, lipid, protein, carbohydrate, EPS, FTIR, TEM etc. | No data of Toxicity of NPs; Only growth studies done. |
| Berthold et al. (2019) | <b>Algae:</b> <i>Characium sp.</i> <b>Bacteria:</b> <i>Pseudomonas composti</i>                                                                              | BG-11 media | bacteria release of unidentified extracellular compounds which might affect the growth rate and lipid metabolism of algae.                              | Not present | Biomass, Lipid, FAME, Molecular phylogenetic analyses | Growth profile, chl a and b, biomass, lipid, protein, carbohydrate, EPS, FTIR, etc       | No data of toxicity of NPs; Mechanism unexplored.     |

|                         |                                                                                                  |                                |                                                                                                                               |    |                                                                                                                      |                                                                                                  |                                                                 |
|-------------------------|--------------------------------------------------------------------------------------------------|--------------------------------|-------------------------------------------------------------------------------------------------------------------------------|----|----------------------------------------------------------------------------------------------------------------------|--------------------------------------------------------------------------------------------------|-----------------------------------------------------------------|
| Ferro et al. (2019)     | <b>algal strain:</b><br><i>Chlorella vulgaris</i><br><b>Bacteria:</b> <i>Rhizobium sp.</i>       | Synthetic Municipal Wastewater | Culture stability along with high nutrient removal capacity even at HRTs of 5 and 3 days                                      | No | Biomass, Specific growth rate, O <sub>2</sub> , CO <sub>2</sub> , N <sub>2</sub> , Lipid, Protein Carbohydrate, FTIR | Present study has NPs and TEM was performed along apart from other parameters done in the study. | No data of Toxicity of NPs.                                     |
| Thøgersen et al. (2018) | <b>Alga</b> <i>Emiliania huxleyi</i><br><b>bacterium</b> <i>Phaeobacter inhibens</i> DSM17395    | Growth Media                   | The presence of the alga facilitated the attachment of the bacterium to a surface                                             | No | DNA isolation, PCR, Fluorescence tagging                                                                             | Growth profile, chl a, chl b, biomass, lipid, protein, carbohydrate, EPS, FTIR, TEM etc.         | No data of Toxicity of NPs; Only growth study                   |
| Ashok et al. (2014)     | <b>Algal-bacterial consortia.</b> <i>Chlorella vulgaris.</i><br><i>Chlamydomonas reinhardtii</i> | Synthetic wastewater           | Almost 90 % removal of Nitrogen and Phosphorus and 80% of COD (2-day HRT)                                                     | No | Temp., pH, chl a, biomass, nitrogen, phosphorus, polysaccharides, alkalinity.                                        | Growth profile, chl a, chl b, biomass, lipid, protein, carbohydrate, EPS, FTIR, TEM etc.         | condition optimum for OECD condition or mixture of NPs          |
| Holmes et al. (2019)    | <b>Bacteria-</b> <i>Escherichia coli</i><br><b>Algae-</b> <i>Auxenochlorella protothecoides</i>  | Simulated wastewater           | In cocultures with algae, minimal or no acetate was observed; COD removal up to 66% faster than <i>E. coli</i> in co-culture. | No | Culture growth, qPCR, organic acid analysis                                                                          | Growth profile, chl a and b, biomass, lipid, protein, carbohydrate, EPS, FTIR                    | No data on toxicity of NPs; no consideration for mixture of NPs |
| Cao et al.              | <b>Algae:</b> <i>Isochrysis</i>                                                                  | NMB3                           | Decrease in the                                                                                                               | No | Growth, chl via                                                                                                      | Growth profile, chl a                                                                            | No NPs toxicity; no information at                              |

|                      |                                                                                          |                       |                                                                                                                                           |    |                                                                                 |                                                                                     |                                                                      |
|----------------------|------------------------------------------------------------------------------------------|-----------------------|-------------------------------------------------------------------------------------------------------------------------------------------|----|---------------------------------------------------------------------------------|-------------------------------------------------------------------------------------|----------------------------------------------------------------------|
| (2019)               | <b>galbana</b><br><b>Bacteria:</b><br><i>Pseudomonas stutzeri</i>                        | media                 | chlorophyll contents by 23–74% in co-culture as compared with the axenic culture in the period of 6 days.                                 |    | fluorescence, DNA extraction, PCR,                                              | and b, biomass, lipid, protein, carbohydrate, EPS, FTIR                             | cellular levels (EC <sub>50</sub> , etc).                            |
| Segev et al (2016)   | <b>Algae:</b> <i>Emiliana huxleyi</i><br><b>Bacteria:</b><br><i>Phaeobacter Inhibens</i> | Growth media          | Naked algal cells covered by bacteria attached via their poles; Over time more attachment of algae with bacteria in co-culture conditions | No | Growth profile, flow cytometry, fluorescence, SEM, LC-MS, chl a, cell analysis. | Growth profile, chl a and b, biomass, lipid, protein, carbohydrate, EPS, FTIR       | No toxicological studies on co-culture; no toxicity study due to NPs |
| Fie et al (2019)     | <b>Bacteria:</b> <i>R. radiobacter</i><br><b>Algae:</b> <i>C. variabilis</i> .           | <i>Growth media</i>   | <i>R. radiobacter</i> -derived nitrogen stimulates fatty-acid oxidation in <i>C. variabilis</i> and promotes its growth                   | No | Growth profile, nitrogen, carbon, FAMES.                                        | Growth profile, chl a and b, biomass, lipid, protein, carbohydrate, EPS, FTIR, TEM. | No toxicity studies; no consideration for OECD conditions            |
| Lepine et al. (2018) | <i>Chlorella spp.</i>                                                                    | Industrial wastewater | A microalgae-bacteria consortium was grown in a mixture of industrial wastewater; Profitable process from reduced                         | No | Cell count, pH, growth, Lipid, FAME,                                            | Growth profile, chl a and b, biomass, lipid, protein, carbohydrate, EPS, FTIR, TEM. | No NPs related toxicity study                                        |

|                                |                                                                                             |                                  |                                                                                                                                                                                       |    |                                                                                          |                                                                                               |                               |
|--------------------------------|---------------------------------------------------------------------------------------------|----------------------------------|---------------------------------------------------------------------------------------------------------------------------------------------------------------------------------------|----|------------------------------------------------------------------------------------------|-----------------------------------------------------------------------------------------------|-------------------------------|
|                                |                                                                                             |                                  | wastewater treatment costs & no added nutrients.                                                                                                                                      |    |                                                                                          |                                                                                               |                               |
| Grover et al. (2020)           | <i>C. vulgaris</i> with <i>Nitrobacter</i>                                                  | Growth media                     | Co-culturing enhanced growth (w/ increased cellular composition and biomass content)                                                                                                  | No | Growth profile, cell count, biomass                                                      | Growth profile, chl a and b, biomass, lipid, protein, carbohydrate, EPS, FTIR                 | No NPs related toxicity study |
| Contreras-Angulo et al. (2019) | Co-culture of <i>Azospirillum brasilense</i> and <i>Scenedesmus sp.</i>                     | Growth media                     | Symbiotic co-culturing of microalgae-bacteria on nitrogen-deficient media for enhancing microalgae colony size and the fatty acid content of biomass for biofuels.                    | No | Biomass, cell size, protein, carbohydrate, fatty acids, nitrogen                         | Growth profile, chl a and b, biomass, lipid, protein, carbohydrate, EPS, FTIR, TEM, etc       | No NPs related toxicity study |
| Zhou et al. (2020)             | <i>Chlorella pyrenoidosa</i> ; <b>Bacteria: High-efficient ammonia-oxidizing strain FN5</b> | Antibiotic containing Wastewater | FN5 enhanced biomass concentration and lipid content of microalga <i>Chlorella pyrenoidosa</i> ; <i>Chlorella pyrenoidosa</i> -FN5 culture removed NH <sub>3</sub> -N and accumulated | No | Enzyme activity (SOD, MDA, CAT), SEM, EPS, IAA, Nitrogen removal, Phosphate, COD removal | Growth profile, chl a and b, biomass, lipid, protein, carbohydrate, EPS, FTIR, TEM, CAT, etc. | No NPs related toxicity study |

|                     |                                                                                                              |                          |                                                                                                                                                                                                                         |    |                                                                                            |                                                                                              |                                |
|---------------------|--------------------------------------------------------------------------------------------------------------|--------------------------|-------------------------------------------------------------------------------------------------------------------------------------------------------------------------------------------------------------------------|----|--------------------------------------------------------------------------------------------|----------------------------------------------------------------------------------------------|--------------------------------|
|                     |                                                                                                              |                          | lipid                                                                                                                                                                                                                   |    |                                                                                            |                                                                                              |                                |
| Verma et al, (2020) | <b>Algae: <i>Chlorella sp.</i></b><br><b>Activated sludge</b>                                                | Lakewater                | Removals of 93% nitrates, 99% phosphates and 73% COD; maximum biomass content =7.8g/L                                                                                                                                   | No | Microalgal growth, biomass, SEM, COD, FTIR, nutrient removal                               | Growth profile, chl a, b, biomass, lipid, protein, carbohydrate, EPS, FTIR, TEM, CAT, etc.   | No NP related toxicity studies |
| Xie et al. (2020)   | <b>Microalgal strain <i>C. saccharophila</i></b><br><b>bacterium <i>C. pealriver</i></b>                     | <i>Growth media</i>      | <i>Chlorella saccharophila</i> was grown in bioreactor while a xylanolytic bacterium <i>Cellvibrio pealriver</i> ; During the CTS strategy, the co-cultivation using xylan as feedstock promotes the microalgal growth. | No | Microbial growth, SEM, total nitrogen concentration, lipid.                                | Growth profile, chl a and b, biomass, lipid, protein, carbohydrate, EPS, FTIR, TEM, etc      | No NPs related toxicity study  |
| Xu et al. (2021)    | <b><i>C. vulgaris</i>, <i>S. obliquus</i>, <i>Spirulina platensis</i></b><br><b>Aerobic activated sludge</b> | Raw municipal wastewater | Nutrient removal was increased; season-dependent nutrient removal; Aeration helps in the removal efficiency.                                                                                                            | No | Wastewater characteristic, biomass, nutrient removal, pH, DO, Nitrogen, Phosphorous, plate | Growth profile, chl a and b, biomass, lipid, protein, carbohydrate, EPS, FTIR, TEM, CAT, etc | No NPs related toxicity study  |

|                     |                                                                                                                                  |                      |                                                                                                                                                                                                                                                                                                                                                              |    |                                                                |                                                                                               |                               |
|---------------------|----------------------------------------------------------------------------------------------------------------------------------|----------------------|--------------------------------------------------------------------------------------------------------------------------------------------------------------------------------------------------------------------------------------------------------------------------------------------------------------------------------------------------------------|----|----------------------------------------------------------------|-----------------------------------------------------------------------------------------------|-------------------------------|
|                     |                                                                                                                                  |                      |                                                                                                                                                                                                                                                                                                                                                              |    | count, TSS, Growth kinetics.                                   |                                                                                               |                               |
| Loria et al. (2021) | <i>C. vulgaris</i> , <i>C. sorokiniana</i> , <i>S. dimorphus</i> , <i>Neochloris oleoabundans</i> ; <i>Activated sludge (AS)</i> | Growth media, sludge | Several microalgal taxa bio flocculated with AS within 2 h; extent of bio-flocculation varied between species of microalgae & P removal was inconsistent in <i>C. vulgaris</i> and <i>N. oleoabundans</i> reactors, but stable and high in <i>S. dimorphus</i> in SBR reactors, though <i>S. dimorphus</i> reactors also exhibited the poorest settleability | No | Biomass, lipid, TSS, growth profile, nitrogen, phosphorous, DO | Growth profile, chl a and b, biomass, lipid, protein, carbohydrate, EPS, FTIR, TEM, CAT, etc. | No NPs related toxicity study |
| Huo et al. (2020)   | <i>Algae Chlorella sp.</i><br><i>Bacteria: Bacillus</i>                                                                          | Vinegar production   | Nutrient removal rates were significantly                                                                                                                                                                                                                                                                                                                    | No | TN, TFA, Cell count, TN, TP,                                   | Growth profile, chl a and b, biomass, lipid,                                                  | No NPs related toxicity study |

|                       |                                                                                            |                      |                                                                                                                                                                                                                                                                                                             |    |                                                                 |                                                                                               |                               |
|-----------------------|--------------------------------------------------------------------------------------------|----------------------|-------------------------------------------------------------------------------------------------------------------------------------------------------------------------------------------------------------------------------------------------------------------------------------------------------------|----|-----------------------------------------------------------------|-----------------------------------------------------------------------------------------------|-------------------------------|
|                       | <b><i>firmus</i></b> <b>and</b><br><b><i>Beijerinckia</i></b><br><b><i>fluminensis</i></b> | Wastewater           | increased after adding bacteria cultures; Mean growth rate of <i>Chlorella</i> was decreased slightly after co-cultures with bacteria; <i>B. fluminensis</i> enhanced the pigment content of <i>Chlorella sp.</i> ; Co-culturing had more notable effect on fatty acid composition rather than oil content. |    | COD, Lipid, Fatty acid                                          | protein, carbohydrate, EPS, FTIR, TEM, CAT, etc.                                              |                               |
| Mujtaba et al. (2017) | <b><i>microalga Chlorella vulgaris</i></b> ; <b><i>bacterium Pseudomonas putida</i></b> .  | Municipal wastewater | higher removal of both nutrients and COD in coculture than each axenic culture; the best removal performance with suspended <i>P. putida</i> and immobilized <i>C. vulgaris</i>                                                                                                                             | No | TP, TN, COD, TOC, TSS, Cell growth, wastewater characterisation | Growth profile, chl a and b, biomass, lipid, protein, carbohydrate, EPS, FTIR, TEM, CAT, etc. | No NPs related toxicity study |

|                           |                                                                                                   |                             |                                                                                                                                                                                                                                                                                                                                                                                                                                                                                                                                                 |           |                                                                                              |                                                                                                      |                             |
|---------------------------|---------------------------------------------------------------------------------------------------|-----------------------------|-------------------------------------------------------------------------------------------------------------------------------------------------------------------------------------------------------------------------------------------------------------------------------------------------------------------------------------------------------------------------------------------------------------------------------------------------------------------------------------------------------------------------------------------------|-----------|----------------------------------------------------------------------------------------------|------------------------------------------------------------------------------------------------------|-----------------------------|
| <p>Xu et al. (2021 b)</p> | <p><i>Chlorella vulgaris</i>,<br/><i>Scenedesmus obliquus</i>,<br/><i>Spirulina platensis</i></p> | <p>Municipal wastewater</p> | <p>In summer &amp; autumn seasons high removal rates and biomass production percentages. In summer season with aeration, highest specific growth rate was 0.46 d<sup>-1</sup>; the highest TN removal rate was 2.34 d<sup>-1</sup>; and the highest TSS removal efficiency was 96.3 ± 2.1%. In autumn season with aeration highest TP removal rate was 1.67 d<sup>-1</sup>. An overall analysis indicated that <i>Chlorella vulgaris</i> and <i>Scenedesmus obliquus</i>, combined with bacteria (<i>Proteobacteria</i>, <i>Firmicutes</i>,</p> | <p>No</p> | <p>Biomass, plate count, COD, pH, DO, TP, TN, nutrient removal kinetics, growth kinetocs</p> | <p>Growth profile, chl a and b, biomass, lipid, protein, carbohydrate, EPS, FTIR, TEM, CAT, etc.</p> | <p>No NPs related study</p> |
|---------------------------|---------------------------------------------------------------------------------------------------|-----------------------------|-------------------------------------------------------------------------------------------------------------------------------------------------------------------------------------------------------------------------------------------------------------------------------------------------------------------------------------------------------------------------------------------------------------------------------------------------------------------------------------------------------------------------------------------------|-----------|----------------------------------------------------------------------------------------------|------------------------------------------------------------------------------------------------------|-----------------------------|



|                    |                                                                              |              |                                                                                                                                                                                                                                                           |    |                                                               |                                                                                               |                               |
|--------------------|------------------------------------------------------------------------------|--------------|-----------------------------------------------------------------------------------------------------------------------------------------------------------------------------------------------------------------------------------------------------------|----|---------------------------------------------------------------|-----------------------------------------------------------------------------------------------|-------------------------------|
|                    |                                                                              |              | <i>Bacteroidetes, Chloroflexi</i> ) can effectively use different carbon, nitrogen, and phosphorus sources from wastewater in different seasons.                                                                                                          |    |                                                               |                                                                                               |                               |
| Xu et al, (2021 a) | <b>Algae: <i>Chlorella vulgaris</i></b><br><b>Bacteria: <i>Bacillus</i>.</b> | Growth media | Two bacterial strains of different genera were isolated from <i>Chlorella vulgaris</i> ; <i>Bacillus</i> strain improved algae growth, photosynthesis, and nutrient removal; 7-day optimal co-culturing conditions with 10:1 bacteria-to-microalgae ratio | No | Biomass, cell count. Nutrient removal, growth kinetics, chl a | Growth profile, chl a and b, biomass, lipid, protein, carbohydrate, EPS, FTIR, TEM, CAT, etc. | No NPs related toxicity study |
| Tao et al. (2020)  | <b><i>Chlorella sp. and Bacillus simplex</i></b>                             | Growth media | Consortium improved phenol degradation efficiency and <i>Chlorella</i>                                                                                                                                                                                    | No | Cell count, growth kinetics, phenol degradation               | Growth profile, chl a and b, biomass, lipid, protein, carbohydrate,                           | No NPs related toxicity study |

|                    |                                                                                                        |              |                                                                                                                                                                                                                                                                               |    |                                                                             |                                                                                               |                                 |
|--------------------|--------------------------------------------------------------------------------------------------------|--------------|-------------------------------------------------------------------------------------------------------------------------------------------------------------------------------------------------------------------------------------------------------------------------------|----|-----------------------------------------------------------------------------|-----------------------------------------------------------------------------------------------|---------------------------------|
|                    |                                                                                                        |              | <i>sp.</i> Growth                                                                                                                                                                                                                                                             |    |                                                                             | EPS, FTIR, TEM, CAT, etc.                                                                     |                                 |
| Li et al. (2021)   | <b><i>Scenedesmus obliquus</i> and <i>Bacillus megaterium</i></b>                                      |              | Co-culture was found more efficient in treating high concentration biogas slurry compared with the pure microalgae culture. Co-culture could efficiently reduce various nutrients in biogas slurry and simultaneously accumulate biomass with higher biofuel characteristics. | No | Biomass, cell growth, chl a, chl b, lipid, TP, TN, COD, etc.                | Growth profile, chl a and b, biomass, lipid, protein, carbohydrate, EPS, FTIR, TEM, CAT, etc. | No NPs related toxicity studies |
| Wang et al. (2021) | <b><i>Monoculture and co-culture of algae (Chlorella vulgaris) and bacteria (activated sludge)</i></b> | Swine manure | When co-cultivated, the algal growth and precipitation (harvest) were promoted, while aerobic bacteria growth was initially promoted, and then inhibited.                                                                                                                     | No | Biomass, pH, TN, COD, DO, cell count, SEM, DNA, Biomass settling efficiency | Growth profile, chl a and b, biomass, lipid, protein, carbohydrate, EPS, FTIR, TEM, CAT, etc. | NPs toxicity was not studied.   |

|                       |                                                                                                                                                                                                                                                                       |                    |                                                                                                                                                                                                                                                                                                          |    |                                           |                                                                                               |                                     |
|-----------------------|-----------------------------------------------------------------------------------------------------------------------------------------------------------------------------------------------------------------------------------------------------------------------|--------------------|----------------------------------------------------------------------------------------------------------------------------------------------------------------------------------------------------------------------------------------------------------------------------------------------------------|----|-------------------------------------------|-----------------------------------------------------------------------------------------------|-------------------------------------|
| Wang et al.,<br>2022  | <i>Algae-bacteria consortia (ABC) in activated sludge</i>                                                                                                                                                                                                             | Cooking wastewater | ABC reactors show satisfactory removal ability. ABC can secrete large EPS to protect themselves and form flocs with good sedimentation performance under toxic and refractory organic wastewater stress.                                                                                                 | No | COD, TN, pH, SS, biomass, EPS, BOD, chl a | Growth profile, chl a and b, biomass, lipid, protein, carbohydrate, EPS, FTIR, TEM, CAT, etc. | NPs toxicity not discussed          |
| Rossi et al.,<br>2022 | <i>Chlorellaceae</i> ( $1 \cdot 10^6$ cell·mL <sup>-1</sup> ),<br><i>Scenedesmaceae</i> ( $0.2 \cdot 10^6$ cell·mL <sup>-1</sup> )<br>and<br><i>Chlamydomonadaceae</i> ( $0.2 \cdot 10^6$ cell·mL <sup>-1</sup> );<br>bacterial culture: heterotrophs and nitrifiers. | Piggery wastewater | Removal of NH <sub>4</sub> <sup>+</sup> , PO <sub>4</sub> <sup>3-</sup> (90%) and COD (59%), with 10.7 g/m <sup>2</sup> /d biomass productivity. The process allowed to reduce the nitrogen spread to arable land by 77%, by increasing the nitrogen valorised as biofertilizers/ bio stimulants and the | No | TSS, TAN, COD, Biomass, chl a, FDA, SEM.  | Growth profile, chl a and b, biomass, lipid, protein, carbohydrate, EPS, FTIR, TEM, CAT, etc. | NPs were not present in this study. |

|                 |                                     |            |                                                                                                                                                                                                                                                                                                                                                                                                                                   |          |                                                             |                                                                                               |                  |
|-----------------|-------------------------------------|------------|-----------------------------------------------------------------------------------------------------------------------------------------------------------------------------------------------------------------------------------------------------------------------------------------------------------------------------------------------------------------------------------------------------------------------------------|----------|-------------------------------------------------------------|-----------------------------------------------------------------------------------------------|------------------|
|                 |                                     |            | nitrogen released to the atmosphere.                                                                                                                                                                                                                                                                                                                                                                                              |          |                                                             |                                                                                               |                  |
| Xu et al., 2023 | <i>Cladophora, activated sludge</i> | Wastewater | The addition of microorganisms increases the removal efficiency of TN in atrazine-containing wastewater by 43.70%, and the addition of <i>Cladophora</i> further increased by 3.82%. The protein signal produced by the microbial release of EPS triggered the algal resistance mechanism, and the conversion and electron transfer between humic acid and fulvic acid constituted the synergistic effect. Proteobacteria was the | Atrazine | DO, biomass, TN, TP, COD, chl a, chl b, SOD, POD, MDA, EPS. | Growth profile, chl a and b, biomass, lipid, protein, carbohydrate, EPS, FTIR, TEM, CAT, etc. | NPs not studied. |

|                    |                                                                  |                      |                                                                                                                                                                                                                                                                      |    |                               |                                                                                               |                          |
|--------------------|------------------------------------------------------------------|----------------------|----------------------------------------------------------------------------------------------------------------------------------------------------------------------------------------------------------------------------------------------------------------------|----|-------------------------------|-----------------------------------------------------------------------------------------------|--------------------------|
|                    |                                                                  |                      | dominant phylum under atrazine stress, accounting for 56.70%–59.67% in the single bacteria groups, whereas it accounted for approximately 3% more in the algae–bacteria consortia.                                                                                   |    |                               |                                                                                               |                          |
| Cheng et al., 2022 | <i>Laboratory grown algae and bacteria from activated sludge</i> | Municipal wastewater | A new type of algae–bacteria biofilm reactor (ABBR) was designed. ABBR allowed a marked improvement on the removals of IMI, TDN, TDP and cod during the 16-day operation. Meanwhile, more IMI degradation products were found in PBR while lower biological toxicity | No | pH, TDS, TN, ICP-MS, biomass, | Growth profile, chl a and b, biomass, lipid, protein, carbohydrate, EPS, FTIR, TEM, CAT, etc. | NPs presence was absent. |

|                   |                                                                                                                   |                      |                                                                                                                                                                                                                                                                              |                            |                                                                     |                                                                                                      |                                        |
|-------------------|-------------------------------------------------------------------------------------------------------------------|----------------------|------------------------------------------------------------------------------------------------------------------------------------------------------------------------------------------------------------------------------------------------------------------------------|----------------------------|---------------------------------------------------------------------|------------------------------------------------------------------------------------------------------|----------------------------------------|
|                   |                                                                                                                   |                      | <p>was detected in ABBR. Furthermore, it's also proved that light played an important role on the performance of ABBR, and a much higher removal efficiency was achieved under <math>80 \mu\text{mol m}^{-2}\cdot\text{s}^{-1}</math>.</p>                                   |                            |                                                                     |                                                                                                      |                                        |
| Wang et al., 2023 | <p><i>Trebouxiophyceae, Saccharimonadales, Propionibacteriaceae, Propionidictyococcaceae, and Micropruina</i></p> | Municipal wastewater | <p>The addition of algae led to an increase in sedimentation performance, biomass, and EPS. The AEBC had a maximum 77.15 % removal rate of C, 63.22 % of N, and 82.54 % of P, respectively. The effluent of algae enhanced reactors suggested that algae had significant</p> | <p>NPs, abiotic stress</p> | <p>Total DNA, PCR, SEM, biomass, chl a, chl b, carotenoid, PCA.</p> | <p>Growth profile, chl a and b, biomass, lipid, protein, carbohydrate, EPS, FTIR, TEM, CAT, etc.</p> | <p>No NPs were used in this study.</p> |

|  |  |  |                                  |  |  |  |  |
|--|--|--|----------------------------------|--|--|--|--|
|  |  |  | effects on pollutant<br>removal. |  |  |  |  |
|--|--|--|----------------------------------|--|--|--|--|

**Table A. 2: Concentrations of NP used in previous toxicity studies.**

| S.No. | Nanoparticle used         | Algae used                                       | NPs conc.               | Time duration | References           |
|-------|---------------------------|--------------------------------------------------|-------------------------|---------------|----------------------|
| 1.    | ZnO                       | <i>Chlorella vulgaris</i>                        | 0.5, 1, 2 mg/L          | 72 h          | Ko et al., 2018      |
|       | CuO                       |                                                  | 8, 16, 33 mg/L          |               |                      |
| 2.    | ZnO                       | <i>Chlamydomonas reinhardtii</i>                 | 1-100 mg/L              | 8 days        | Gunawan et al., 2013 |
| 3.    | ZnO                       | <i>Skeletonema costatum</i>                      | 5-50 mg/L               | 96 hrs.       | Zhang et al., 2016   |
| 4.    | ZnO                       | <i>Phaeodactylum tricornutum</i> (marine diatom) | 0.1-10 mg/L             | 72 hrs.       | Li et al., 2017      |
| 5.    | ZnO                       | <i>Scenedesmus obliquus</i>                      | 0.01 -50 mg/L           | 72 hrs.       | Ye et al., 2018      |
| 6.    | ZnO and CuO               | <i>Scenedesmus obliquus</i>                      | 1 mg/L                  | 96 hrs.       | Ye et al., 2017      |
| 7.    | ZnO and CuO               | <i>Scenedesmus obliquus</i>                      | 1 and 10 mg/L           | 35 days       | Rana and Kumar, 2023 |
| 8.    | ZnO and CuO               | <i>Scenedesmus obliquus</i>                      | 0.1, 1, 10 and 100 mg/L | 96 hrs.       | Rana and Kumar, 2023 |
| 9.    | MWCNTs and CuO            | <i>Tetradesmus obliquus</i>                      | 0.01-200 mg/L           | 96 hrs.       | Fang et al., 2022    |
| 10.   | nTiO <sub>2</sub> and BPA | <i>Scenedesmus obliquus</i>                      | 0.4-3.2 mg/L            | 72 hrs.       | Das et al., 2024     |



## Appendix B: Methodology

### **B.1 Estimation of different parameters using analysis data**

#### ***B.1.1. Growth Profile and cell number***

Growth curve or growth profiling shows the number of cells growing in a population against time for various phases of growth (such as lag phase, log or exponential phase, stationary phase and decline phase). Absorbance at 750 nm was taken after every alternate day till t=96 hours as per the method given in the (Trenkenshu et al., 2009) study. Absorbance was adjusted for NP presence by subtracting OD of NP only suspension from OD of suspension containing both NP and algae. Cell number was counted every alternate day and cell density was calculated using the equation A.1 (Guillard, 1973):

$$\text{Cell Density (per ml)} = \text{Total number of cells} * 25000 * \text{Dilution Factor} \dots\dots\dots \text{(A.1)}$$

#### ***B.1.2 Dry cell weight***

Dry cell weight (dcw) of the microalgal strain was determined gravimetrically according to Rai et al. (1991). Briefly, the dry weight of the microalgae biomass with a known volume i.e., 5 ml was centrifuged at 5000 rpm (REMI C-24) \_ for 10 min. The harvested biomass was dried at 105°C until the weight was invariant. The microalgae dry weight was obtained by subtracting the blank biomass. The OD<sub>680</sub> value was converted to biomass concentration via appropriate calibration between OD<sub>680</sub> and dry cell weight as per the following obtained Eq. (B.2):

$$\text{Dry weight of biomass} = \frac{\text{Final weight}(g) - \text{initial weight}(g)}{\text{initial weight}(g)} \dots\dots\dots \text{(B.2)}$$

#### ***B.1.3 Specific growth rate***

Specific growth rate can be defined as the rate of increase of biomass of a cell per unit of biomass concentration with respect to time. The specific growth rate ( $\mu$ : day<sup>-1</sup>) was determined

at different intervals from day 0 to 96 hours based on the values obtained from the cell concentration using the equation (B.3) proposed by Arredondo et al., 2017:

$$\mu = \frac{\ln N2 - \ln N1}{t2 - t1} \dots\dots\dots$$

**(B.3)**

where N1 and N2 are the cell density values at times t1 and t2, respectively. Cell densities were calculated using the formula mentioned above in equation 1 at different time intervals from day 0 to day 96 hours.

Maximum specific growth ( $\mu_{max}$ ) was calculated using the different  $\mu$  values calculated for all the samples. Cell doubling time was also calculated using the following equation (B.4) (Sankar et al., 2011):

$$t_d = \frac{\ln 2}{\mu_{max}} \dots\dots\dots$$

**(B.4)**

***B.1.4 Determination of Chlorophyll a & b and Carotenoid***

Chlorophyll a and b, colourful pigments, are found in plants and algal cells. Chlorophyll a (green pigment) plays an important role in the photosynthesis process. Chlorophyll b (also a green pigment) absorbs blue-violet wavelength light. Carotenoid, pigments help in the process of photosynthesis. At t=96 hours, 10 mL algae suspension was collected and centrifuged at 4,000 ×g for 10 min. After the removal of the supernatant, 2.5 mL of 80% (V/V) acetone was added and extracted. The extracts were then centrifuged at 10,000 ×g for 10 min. The supernatant was analyzed for optical density at 350–700 nm light wavelength continuously (UV/Visible spectrophotometer, Hitachi). The contents of chl-a and chl -b, and carotenoids were calculated according to equations (B.5-B.7) given in the Xiong et al. (2005) study:

$$\text{Chlorophyll a, } C_A = (12.7 OD_{663} - 2.69 OD_{645}) \dots\dots\dots \text{(B.5)}$$

$$\text{Chlorophyll b, } C_B = (22.9 OD_{645} - 4.68 OD_{633}) \dots\dots\dots \text{(B.6)}$$

$$\text{Carotenoid, } C_k = (1000 OD_{440} - 1.9 C_A - 63.14 C_B) \div 214 \dots\dots\dots \text{(B.7)}$$

where,  $C_A$  ( $\mu\text{g/ml}$ ) and  $C_B$  ( $\mu\text{g/ml}$ ) are contents of chl-a and chl-b, and  $C_K$  ( $\mu\text{g/ml}$ ) is content of carotenoids.

**B.1.5 Protein content**

Algal cells are said to have high amount of proteins, amino acids and lipids. For protein content determination, the Bradford assay was followed (Bradford, 1975). Bradford reagent was made using 50 mg of Coomassie Brilliant Blue G-250 in 50 mL methanol. Then, 100 mL of 85 % phosphoric acid was taken and transferred to make the volume 1 L by using 850 mL  $\text{H}_2\text{O}$ . 10 dilutions of BSA (Bovine Serum Albumin) were prepared and standard curve was made up. Absorbance was measured at 595 nm using spectrophotometer.

**B.1.6 Lipid content**

Total lipid content was calculated using the Bligh and Dyer method (1959) gravimetrically. A know volume of dried biomass was taken and was washed with (2:1 v/v) Chloroform-methanol solution. The extract was then dissolved in 1 ml of chloroform and transferred into glass vial of 15 ml (pre-weighted). The extract was dried and kept in desiccator containing silica gel for 24 hours and then weighed. The value of lipid content was calculated using equation (B.8).

$$\text{Lipid Content} = \frac{\text{Weight of lipid + Vial (final weight of vial)} - \text{weight of empty vial}}{\text{dry weight biomass}} \times 100\% \text{ (B.8)}$$

**B.1.7 Microscopic Characterization**

For the structural analysis of different samples, microscopic characterization of all the samples at  $t=0$  and  $t=96$  hours was done using Transmission Electron Microscopy (TEM) (instrument: JEOL 2100F). Microscopic characterisation was done to see the changes and aggregation formation inside and outside the algal cells and in the suspension. The size of NPs was determined using TEM, and the observed size of standard suspension of NPs was  $< 50$  nm for CuO NPs and  $< 40$  nm for ZnO NPs. Also, at 10X and 40X, the microscopic images were also taken using the table-top microscope (Olympus CX21i).

#### ***B.1.8 FTIR (Fourier Transmittance Infrared Spectroscopy)***

FTIR was done to see the presence of bio component in the algal biomass. Samples (1.5 mL) were collected at  $t=0$  and  $t=96$  hours and centrifuged for 5 min at 10,000 rpm, followed by discarding of supernatant. 10  $\mu$ l of the sample was used for the FTIR analysis (Instrument: NICOLET - IS-50, Thermo). IR spectra were recorded with transmission mode in the spectral range of 4000-800  $\text{cm}^{-1}$ .

#### ***B.1.9 Metal and ion Content***

Metal and ion content in suspension was calculated by taking sample from the flask at  $t=0$  and  $t=96$  hrs., digesting it with acid (3050G method (APHA, 1998)) and analysing it with ICP-MS (ICP-MS Agilent 7900). Using obtained values at  $T=0$  and  $t=96$  hours for all the samples, change in metal contents of suspension was calculated.

#### ***B.1.10 Measurement of hydrodynamic diameter of particles and zeta potential***

For particle size measurement using DLS, the suspension was ultrasonicated (100 W,  $33 \pm 3$  kHz) for 30 min. The suspension was then transferred in cuvettes for size determination. The DLS size (hydrodynamic diameter) was observed to be in a range of 90–400 nm for standard NPs. The variation of HDD at  $t=0$  and  $t=96$  hours was studied to observe change in size of nanoparticles over a period in the algal suspension. Values were measured using the dynamic

light scattering particle sizer (Nicomp Zetasizer ZLS380; wavelength= 633 nm; detector angle=173°).

#### ***B.1.11 CAT assay***

CAT assay was analysed for all the samples using the CAT assay analysing kit obtained from Sigma Aldrich (CAT-100). All the steps which were performed was as per the instructions of the kit.

#### ***B.1.12 EPS estimation and quantification***

EPS extraction was done by the using ethanol method as mentioned by Gong et al., 2009, Jolanta Jaroszuk-Ścisiel et al., 2020. EPS lipid, EPS protein and EPS carbohydrate was estimated using the procedure as described in above sections.

**Table B.1: Composition of the OECD TG 201 media. (pH-8.1)**

| <b>Component</b>                                     | <b>Concentration (mg/L)</b> |
|------------------------------------------------------|-----------------------------|
| <b>NaHCO<sub>3</sub></b>                             | <b>50.00</b>                |
| <b>NH<sub>4</sub>Cl</b>                              | <b>15.00</b>                |
| <b>MgCl<sub>2</sub>.6H<sub>2</sub>O</b>              | <b>12.00</b>                |
| <b>CaCl<sub>2</sub>.2H<sub>2</sub>O</b>              | <b>18.00</b>                |
| <b>MgSO<sub>4</sub>.7H<sub>2</sub>O</b>              | <b>15.00</b>                |
| <b>KH<sub>2</sub>PO<sub>4</sub></b>                  | <b>1.60</b>                 |
| <b>FeCl<sub>3</sub>.6H<sub>2</sub>O</b>              | <b>0.0640</b>               |
| <b>Na<sub>2</sub>EDTA.2H<sub>2</sub>O</b>            | <b>0.100</b>                |
| <b>H<sub>3</sub>BO<sub>3</sub></b>                   | <b>0.185</b>                |
| <b>MnCl<sub>2</sub>.4H<sub>2</sub>O</b>              | <b>0.415</b>                |
| <b>ZnCl<sub>2</sub></b>                              | <b>0.00300</b>              |
| <b>CoCl<sub>2</sub>.6H<sub>2</sub>O</b>              | <b>0.00150</b>              |
| <b>Na<sub>2</sub>MnO<sub>4</sub>.2H<sub>2</sub>O</b> | <b>0.00700</b>              |
| <b>CuCl<sub>2</sub>. 2H<sub>2</sub>O</b>             | <b>0.00001</b>              |

**Table B.2: Following is the BG-11 media composition. (Hong et al., 2016)**

BG-11 media composition

A) Stock solutions for BG-11

Stock solution -1

|                                        |          |
|----------------------------------------|----------|
| Na <sub>2</sub> Mg EDTA                | 0.1 gm/L |
| Ferric ammonium citrate                | 0.6 gm/L |
| Citric acid. 1 H <sub>2</sub> O        | 0.6 gm/L |
| CaCl <sub>2</sub> . 2 H <sub>2</sub> O | 3.6 gm/L |

Autoclave the solution.

Stock solution -2

|                                        |          |
|----------------------------------------|----------|
| MgSO <sub>4</sub> . 7 H <sub>2</sub> O | 7.5 gm/L |
|----------------------------------------|----------|

Autoclave the solution.

Stock solution-3

|                                 |           |
|---------------------------------|-----------|
| K <sub>2</sub> HPO <sub>4</sub> | 3.05 gm/L |
|---------------------------------|-----------|

Autoclave the solution.

Stock solution – 4

|                                       |           |
|---------------------------------------|-----------|
| H <sub>3</sub> BO <sub>3</sub>        | 2.86 gm/L |
| MnCl <sub>2</sub> . 4H <sub>2</sub> O | 1.81 gm/L |

|                                        |            |
|----------------------------------------|------------|
| ZnSO <sub>4</sub> . 7H <sub>2</sub> O  | 0.22 gm/L  |
| CuSO <sub>4</sub> . 5H <sub>2</sub> O  | 0.079 gm/L |
| CoCl <sub>2</sub> . 6H <sub>2</sub> O  | 0.050 gm/L |
| NaMoO <sub>4</sub> . 2H <sub>2</sub> O | 0.391 gm/L |

Autoclave the solution.

*As per the method of paper Hong et al., 2016 and Pandey et al., 2023; Air or carbon dioxide has been provided to the algal culture externally.*



## Appendix C: Results

### C.1 Effect on algae pigments

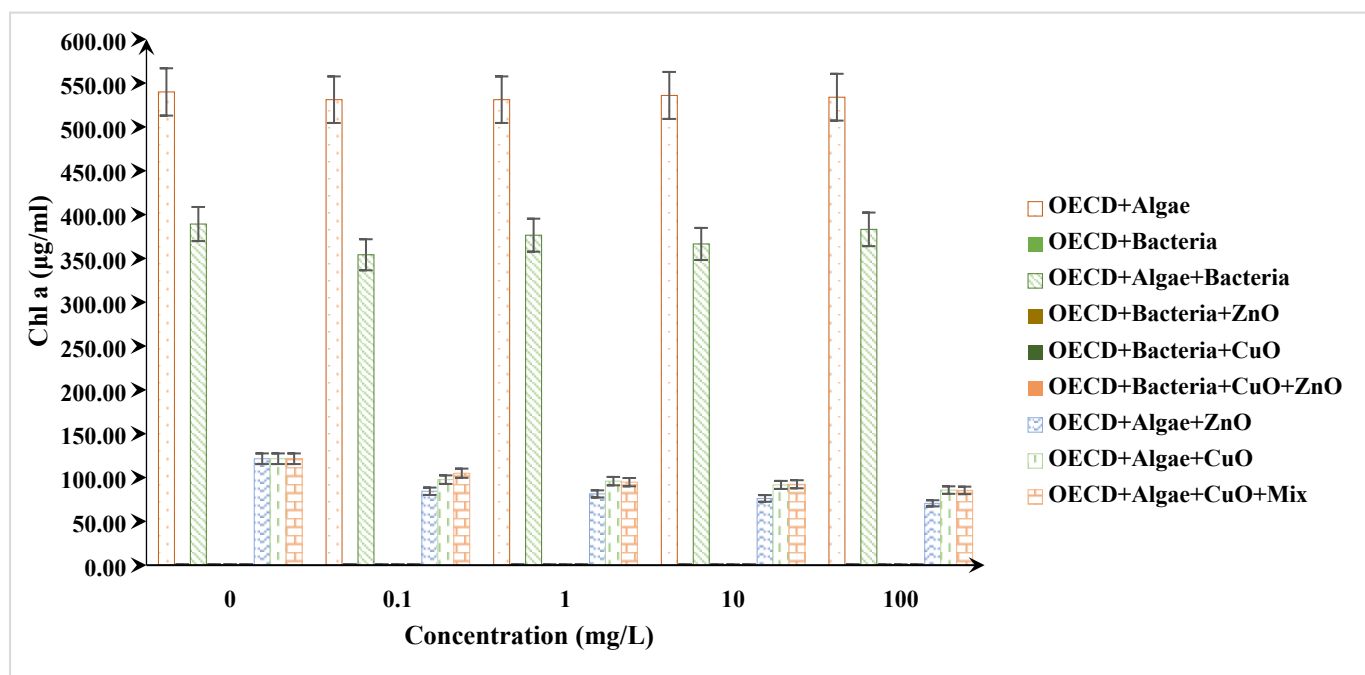

Figure C.1.1: Chl a content in the sample containing different concentrations of nanoparticles at algae-bacteria ratio (1:100).

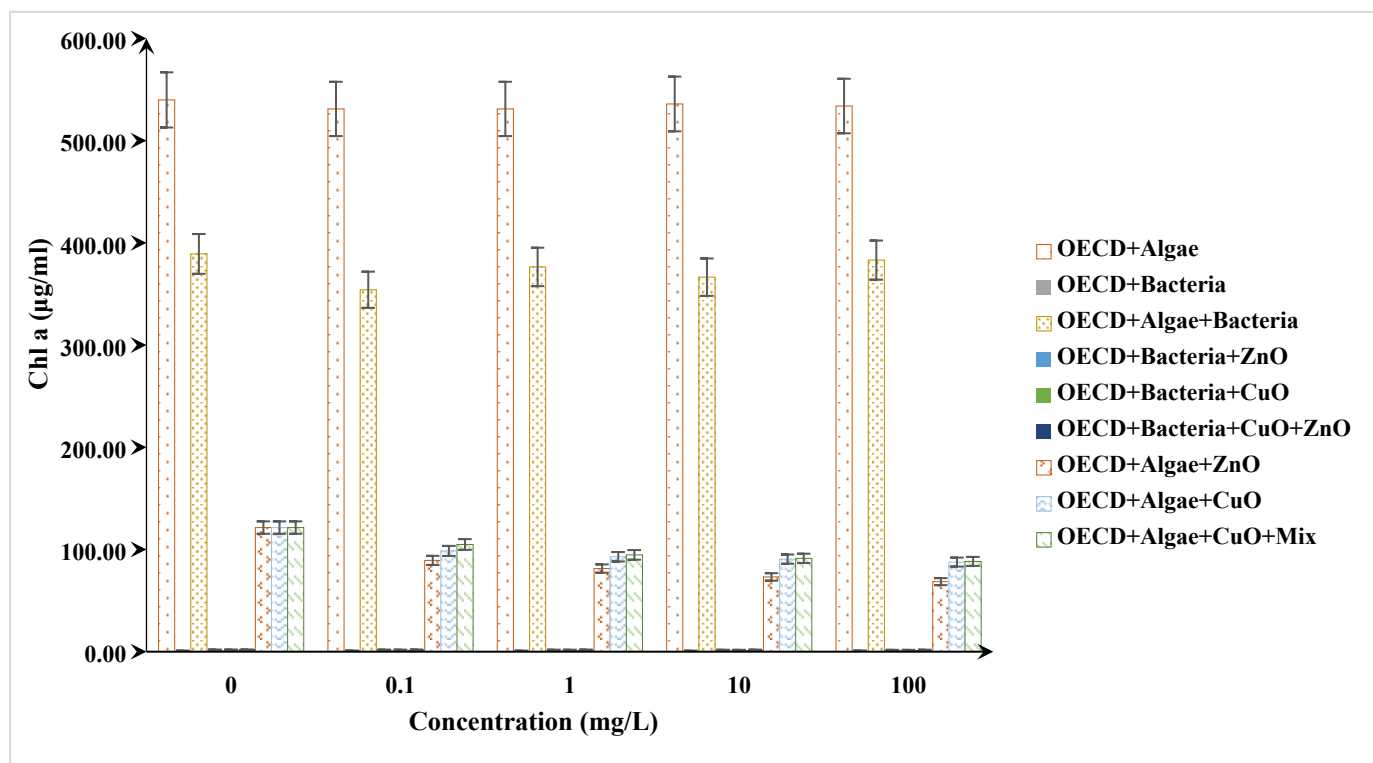

Figure C.1.2: Chl a content in the sample containing different concentrations of nanoparticles at algae-bacteria ratio (1:1).

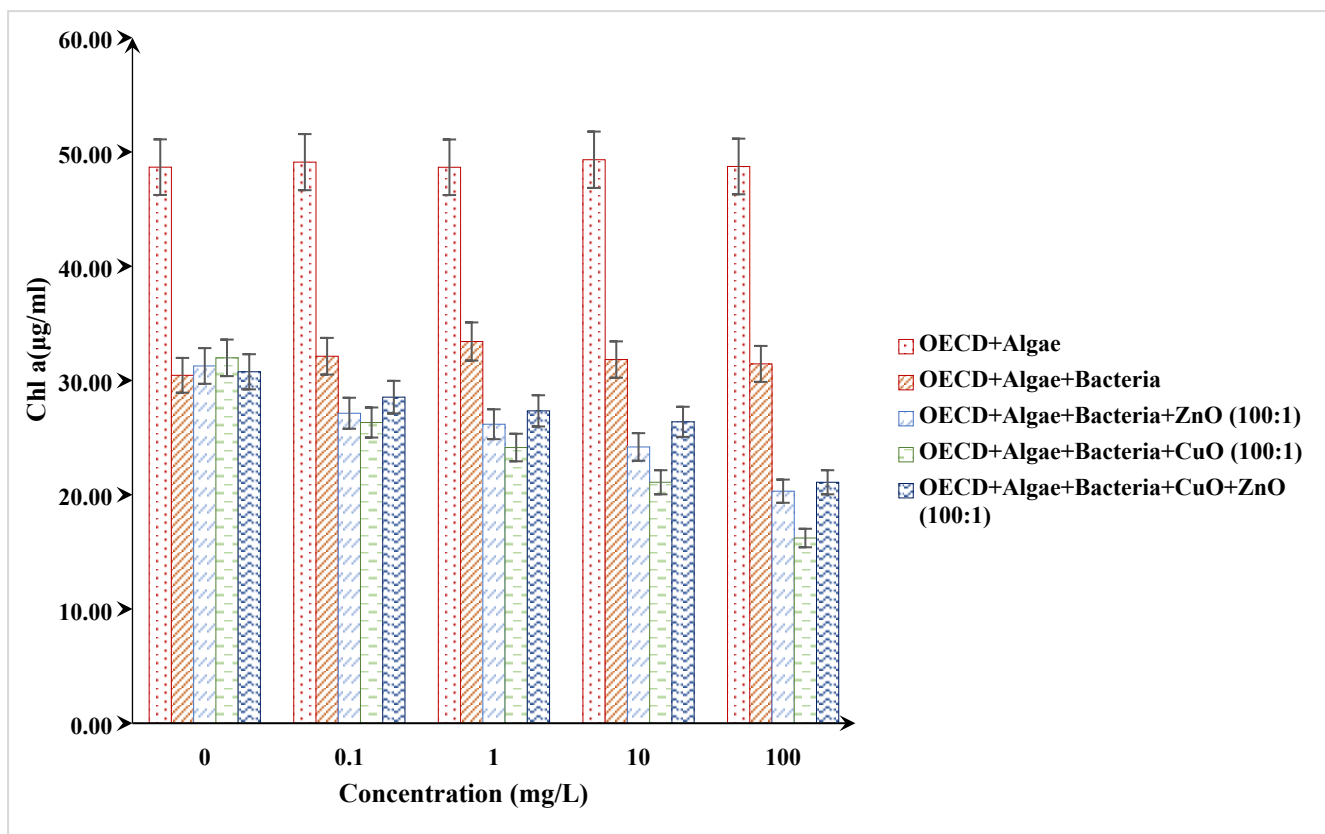

**Figure C.1.3: Chl b content in the sample containing different concentrations of nanoparticles at algae-bacteria ratio (100:1).**

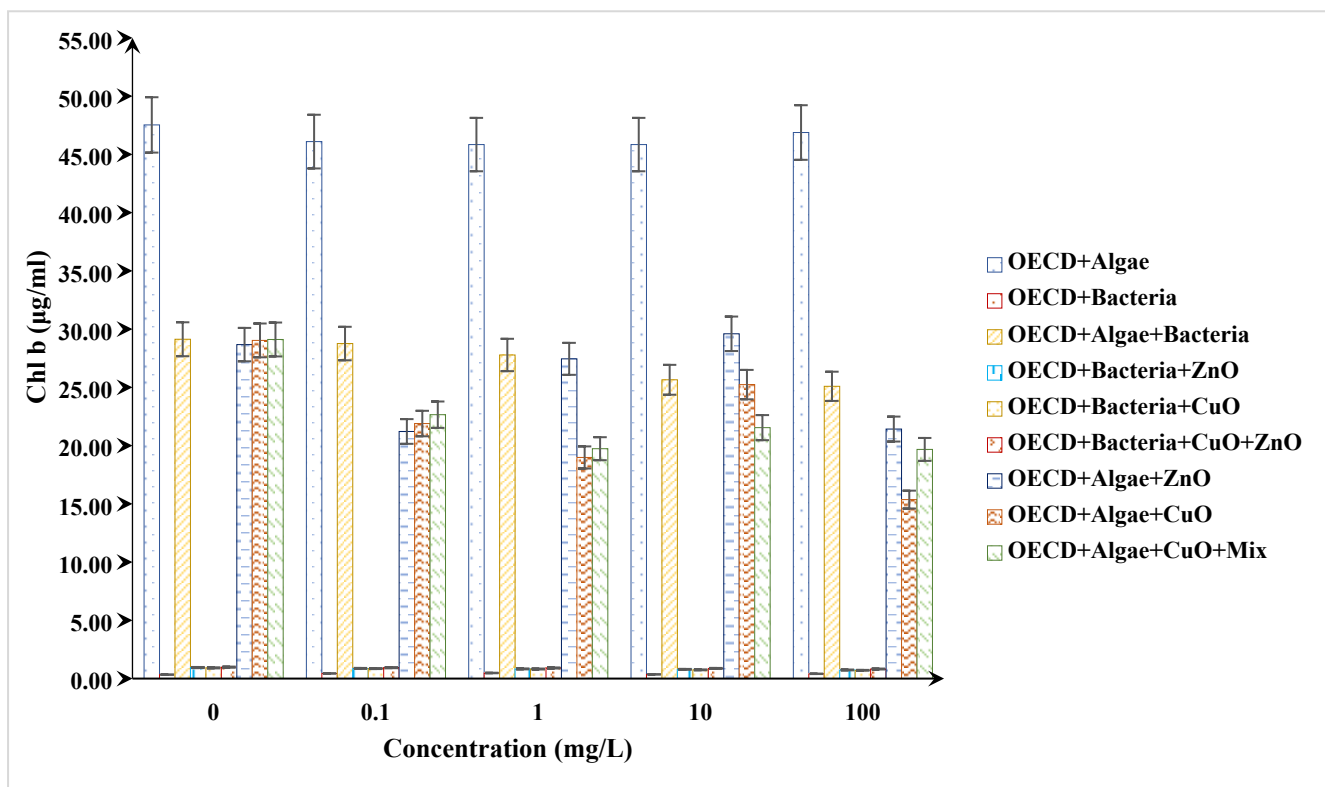

**Figure C.1.4: Chl b content in the sample containing different concentrations of nanoparticles at algae-bacteria ratio (1:100).**

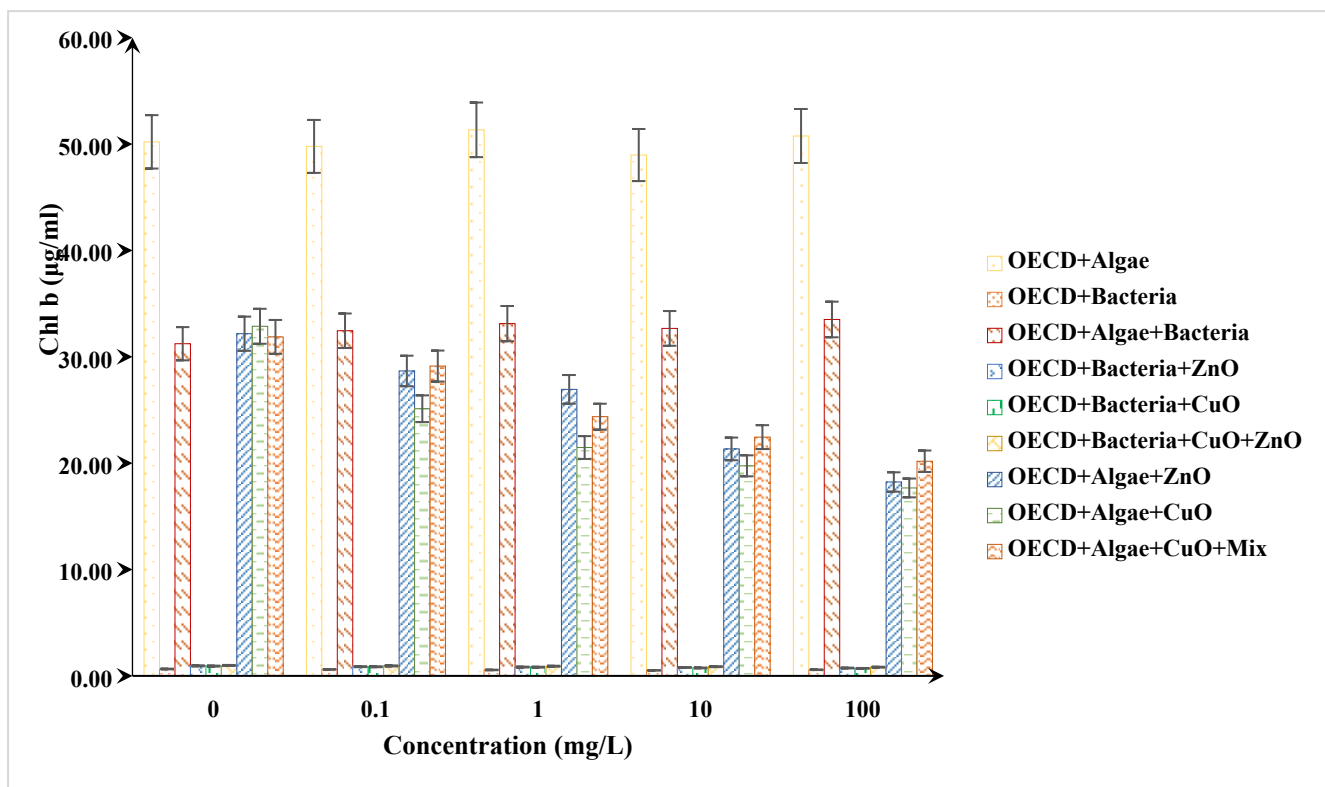

**Figure C.1.5: Chl b content in the sample containing different concentrations of nanoparticles at algae-bacteria ratio (1:1).**

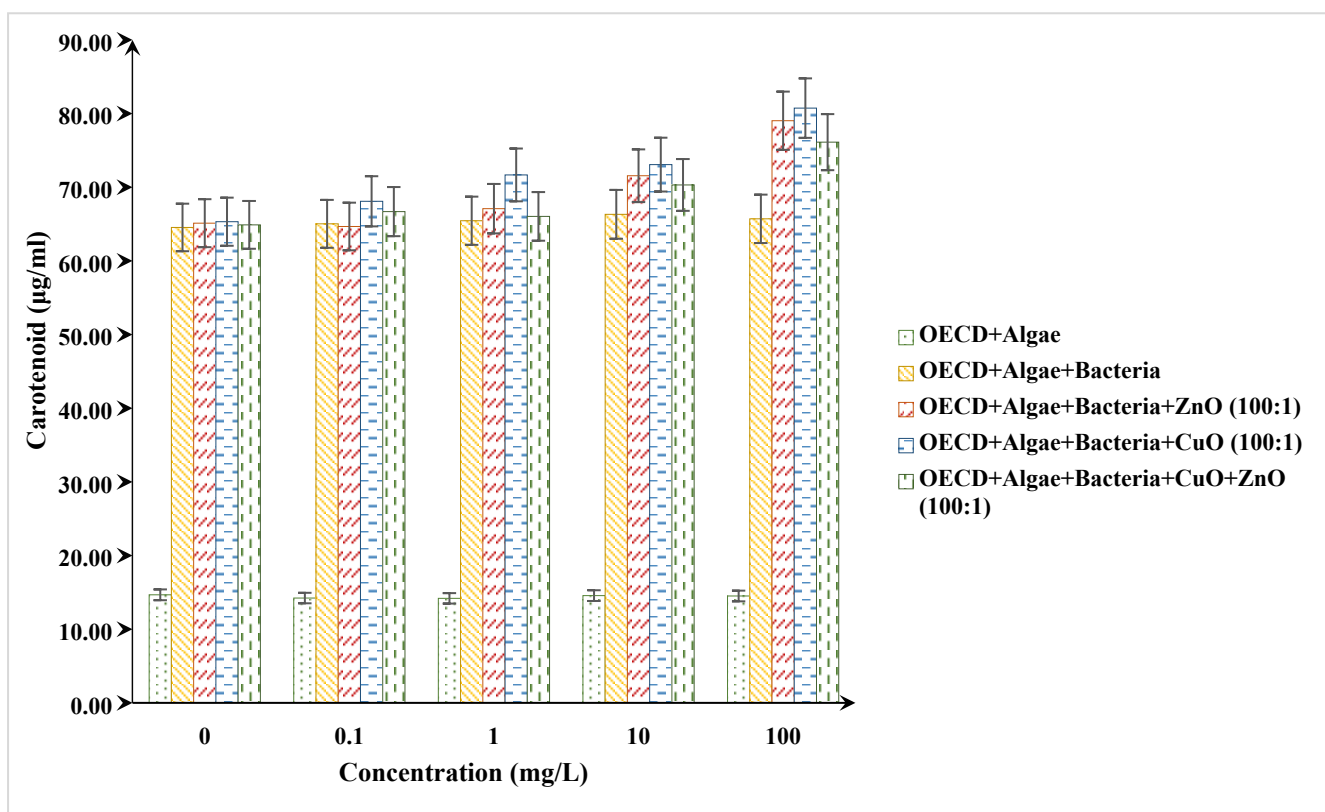

**Figure C.1.6: Carotenoid content in the sample containing different concentrations of nanoparticles at algae-bacteria ratio (1:100).**

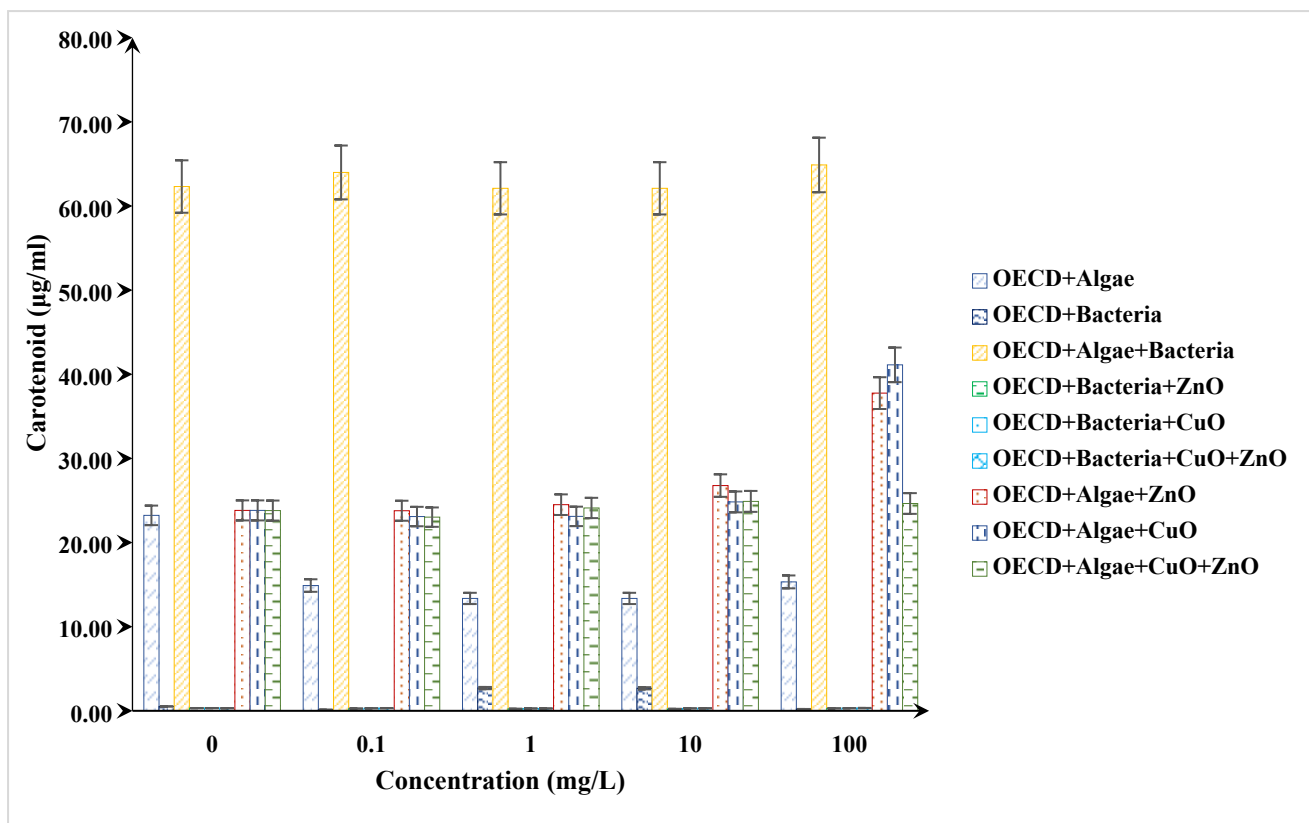

**Figure C.1.7: Carotenoid content in the sample containing different concentrations of nanoparticles at algae-bacteria ratio (1:100).**

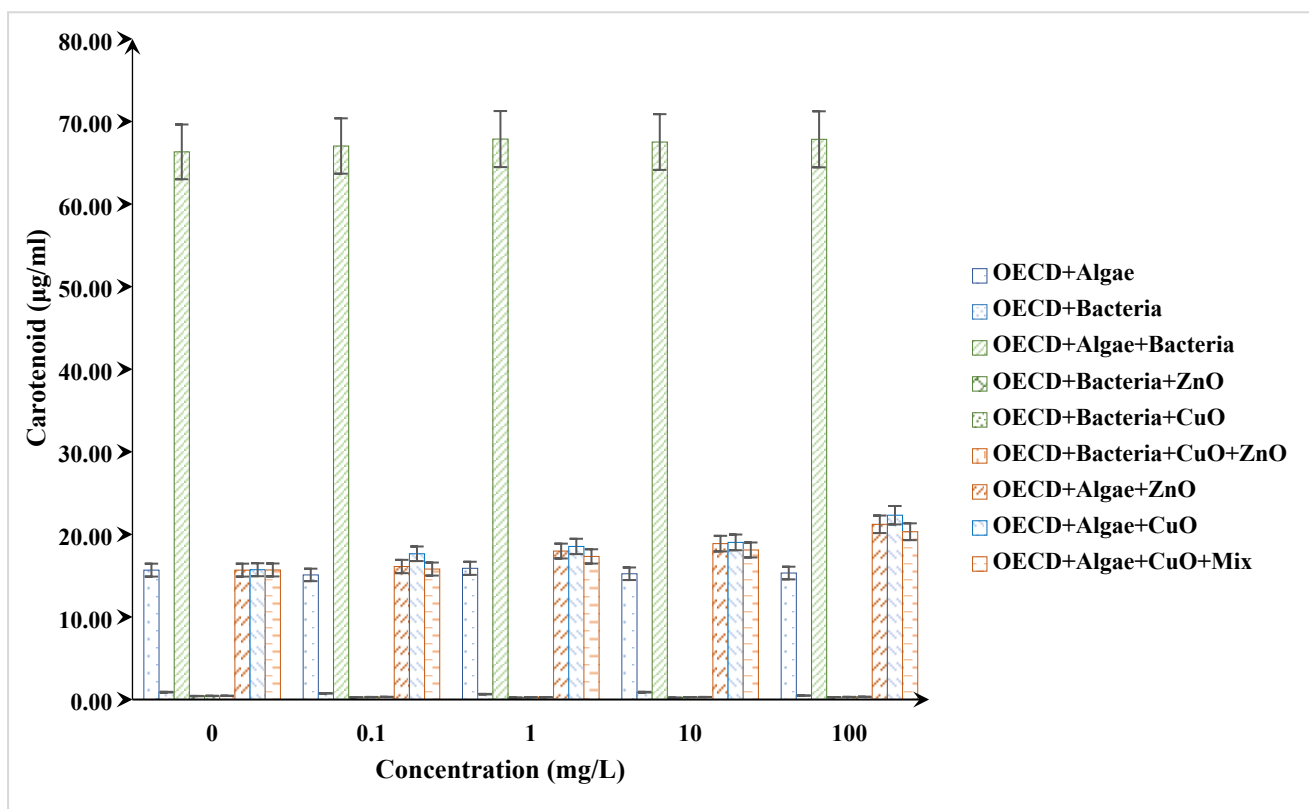

**Figure C.1.8: Carotenoid content in the sample containing different concentrations of nanoparticles at algae-bacteria ratio (1:1).**

## C.2 Effect on algal and bacterial cell count and biomass

**Table C.1. Calculation of % growth reduction difference for algal cell count for 100:1 ratio.**

| Conc. (mg/L) | %GR ZnO | %GR CuO | %GR Dual | % (GR) <sub>cal</sub> | % (GR) <sub>obs</sub> | %GR (GR) <sub>diff</sub> | Remark       |
|--------------|---------|---------|----------|-----------------------|-----------------------|--------------------------|--------------|
| 0.1+0.1      | 35.05   | 38.64   | 27.27    | 73.69                 | 27.27                 | 46.42                    | Antagonistic |
| 1+1          | 41.08   | 45.76   | 32.65    | 86.84                 | 32.65                 | 54.19                    | Antagonistic |
| 10+10        | 51.09   | 55.76   | 42.93    | 106.85                | 42.93                 | 63.92                    | Antagonistic |
| 100+100      | 66.23   | 69.63   | 61.90    | 135.86                | 61.90                 | 73.96                    | Antagonistic |

(Antagonistic as  $\%(GR)_{diff} = \text{Positive}$ )

**Table C.2: Calculation of Standard Error Difference for algal cell count.**

| Conc. (mg/L) | SE ZnO | SE CuO | SE Dual | (SE) <sub>cal</sub> | (SE) <sub>obs</sub> | (SE) <sub>diff</sub> |
|--------------|--------|--------|---------|---------------------|---------------------|----------------------|
| 0.1+0.1      | 2.43   | 4.52   | 3.67    | 6.95                | 3.67                | 7.859                |
| 1+1          | 3.56   | 5.43   | 4.02    | 8.99                | 4.02                | 9.848                |
| 10+10        | 3.99   | 6.43   | 4.87    | 10.42               | 4.87                | 11.502               |
| 100+100      | 5.78   | 8.34   | 6.88    | 14.12               | 6.88                | 15.707               |

**Table C.3: Calculation of t-statistics for algal cell count.**

| Conc. (mg/L) | % (GR) <sub>cal</sub> | % (GR) <sub>obs</sub> | (SE) <sub>diff</sub> | t <sub>cal</sub> | t <sub>obs</sub> | Remark      |
|--------------|-----------------------|-----------------------|----------------------|------------------|------------------|-------------|
| 0.1+0.1      | 73.69                 | 27.27                 | 7.859                | 9.377            | 3.47             | Significant |
| 1+1          | 86.84                 | 32.65                 | 9.848                | 8.818            | 3.32             | Significant |
| 10+10        | 106.85                | 42.93                 | 11.502               | 9.290            | 3.73             | Significant |
| 100+100      | 135.86                | 61.90                 | 15.707               | 8.650            | 3.94             | Significant |

(Significant as  $t_{cal} > t_{obs}$ )

**Table C.4. Calculation of % growth reduction difference for bacterial cell count.**

| Conc. (mg/L) | %GR ZnO | %GR CuO | %GR Dual | % (GR) <sub>cal</sub> | % (GR) <sub>obs</sub> | %GR (GR) <sub>diff</sub> | Remark       |
|--------------|---------|---------|----------|-----------------------|-----------------------|--------------------------|--------------|
| 0.1+0.1      | 16.33   | 18.42   | 10.53    | 34.75                 | 10.53                 | 24.22                    | Antagonistic |
| 1+1          | 18.65   | 23.45   | 13.64    | 42.10                 | 13.64                 | 28.46                    | Antagonistic |
| 10+10        | 23.65   | 27.04   | 16.92    | 50.69                 | 16.92                 | 33.77                    | Antagonistic |
| 100+100      | 26.09   | 30.89   | 18.67    | 56.98                 | 18.67                 | 38.31                    | Antagonistic |

(Antagonistic as  $\%(GR)_{diff} = \text{Positive}$ )

**Table C.5: Calculation of Standard Error Difference for bacterial cell count.**

| Conc. (mg/L) | SE ZnO | SE CuO | SE Dual | (SE) <sub>cal</sub> | (SE) <sub>obs</sub> | (SE) <sub>diff</sub> |
|--------------|--------|--------|---------|---------------------|---------------------|----------------------|
| 0.1+0.1      | 3.45   | 4.06   | 5.43    | 7.51                | 5.43                | 9.27                 |
| 1+1          | 4.98   | 6.56   | 6.83    | 11.54               | 6.83                | 13.41                |
| 10+10        | 6.09   | 9.45   | 7.98    | 15.54               | 7.98                | 17.47                |
| 100+100      | 8.72   | 11.23  | 9.32    | 19.95               | 9.32                | 22.02                |

**Table C.6: Calculation of t-statistics for bacterial cell count.**

| Conc. (mg/L) | % (GR) <sub>cal</sub> | % (GR) <sub>obs</sub> | (SE) <sub>diff</sub> | t <sub>cal</sub> | t <sub>obs</sub> | Remark      |
|--------------|-----------------------|-----------------------|----------------------|------------------|------------------|-------------|
| 0.1+0.1      | 34.75                 | 10.53                 | 9.27                 | 3.75             | 1.14             | Significant |
| 1+1          | 42.10                 | 13.64                 | 13.41                | 3.14             | 1.07             | Significant |
| 10+10        | 50.69                 | 16.92                 | 17.47                | 2.90             | 0.968            | Significant |
| 100+100      | 56.98                 | 18.67                 | 22.02                | 2.59             | 0.848            | Significant |

(Significant as  $t_{cal} > t_{obs}$ )

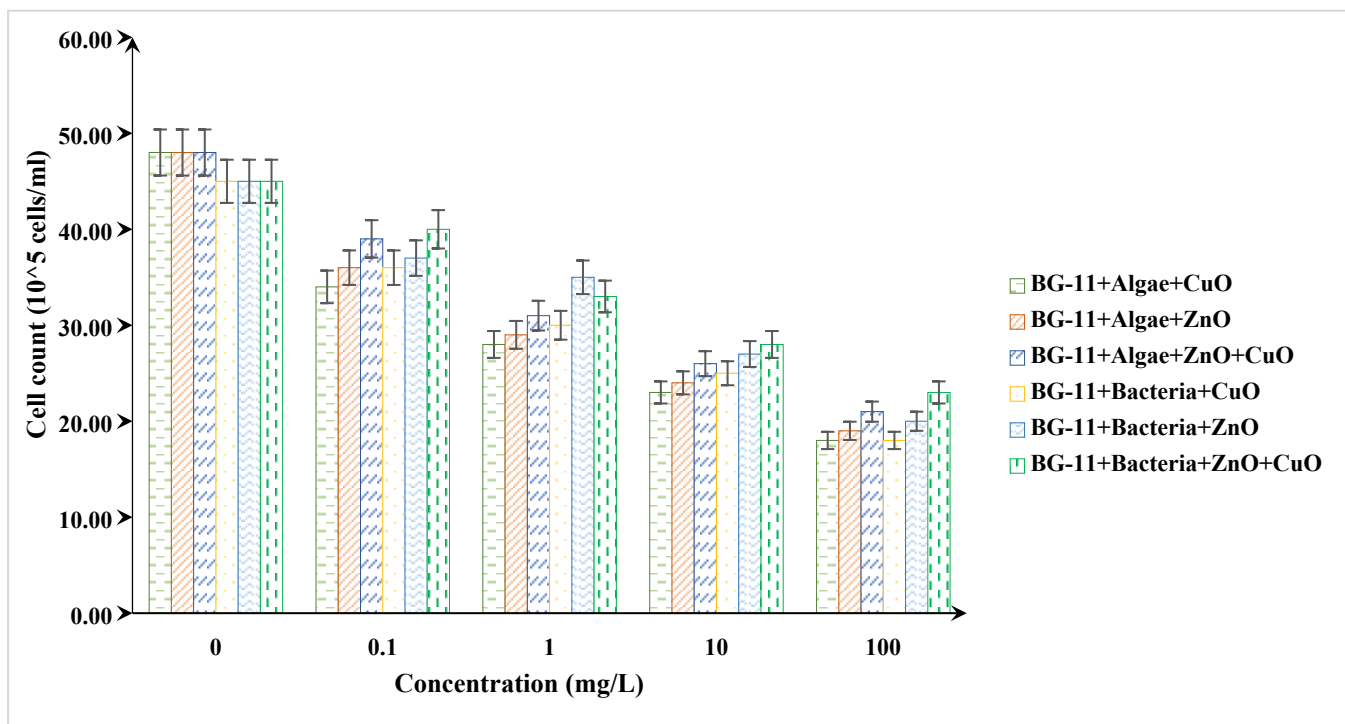

**Figure C.2.1: Cell count in the sample containing different concentrations of nanoparticles at algae-bacteria ratio (100:1).**

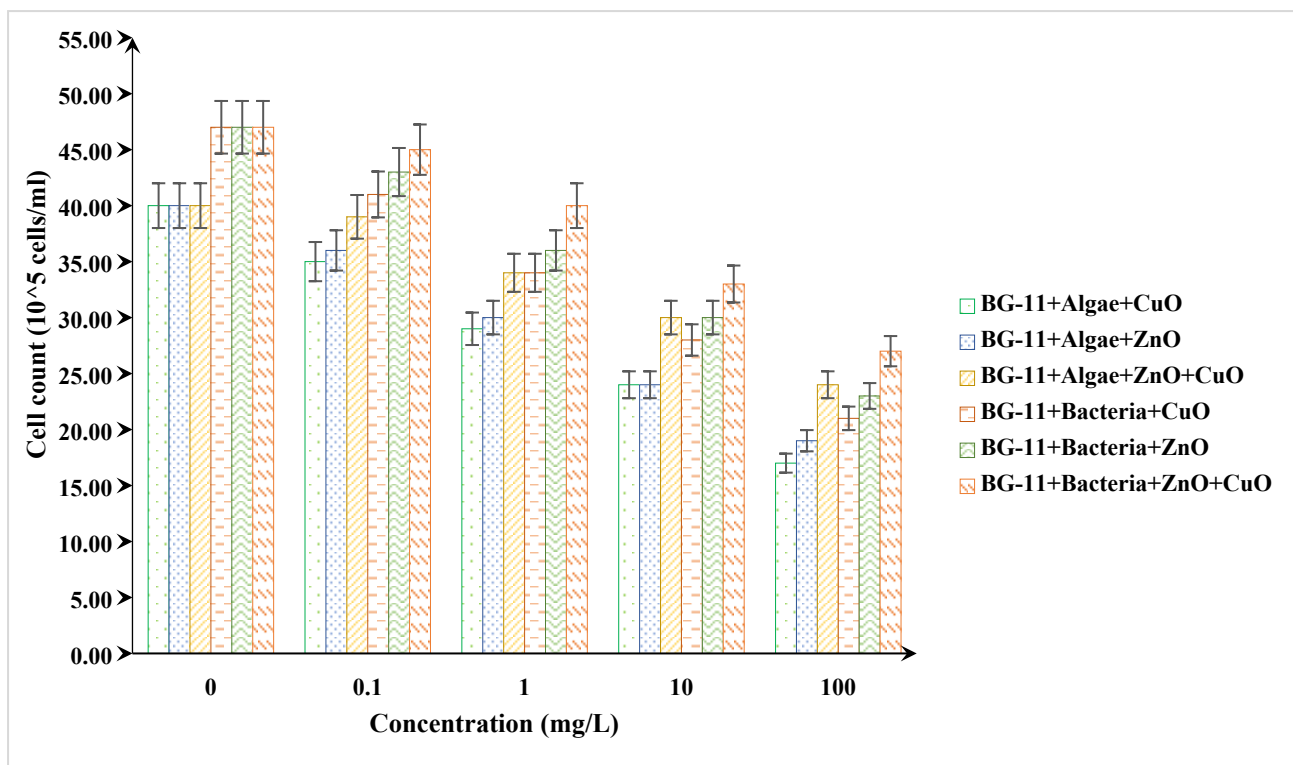

Figure C.2.2: Cell count in the sample containing different concentrations of nanoparticles at algae-bacteria ratio (1:100).

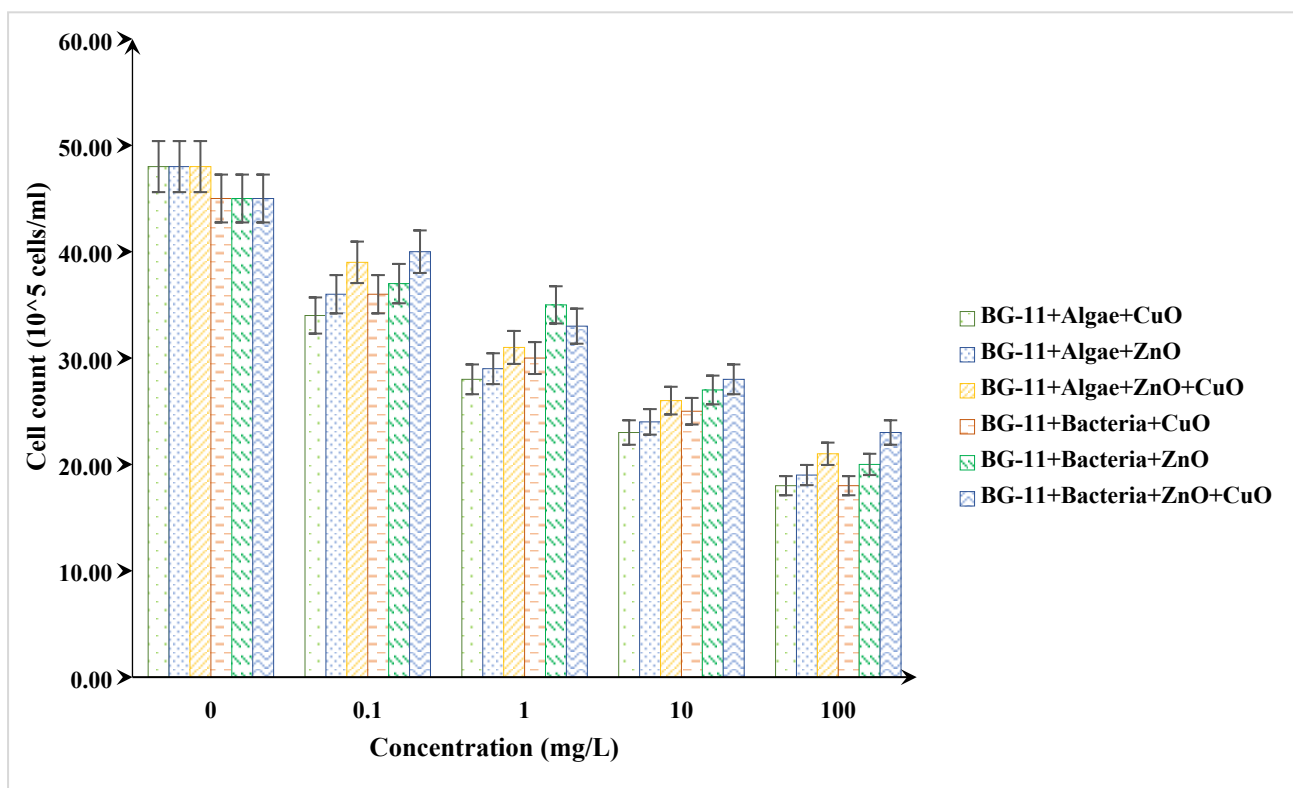

Figure C.2.3: Cell count in the sample containing different concentrations of nanoparticles at algae-bacteria ratio (1:1).

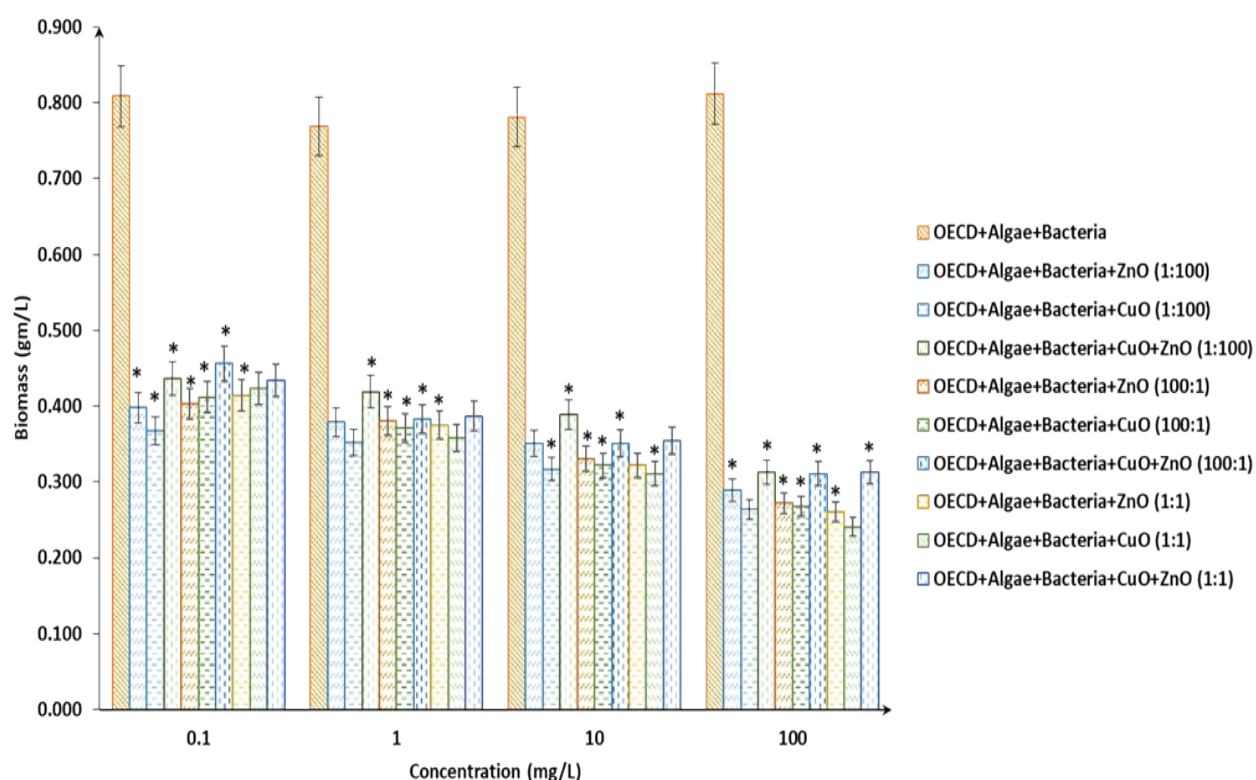

**Figure C.2.4: Biomass in the various samples containing algae+bacteria at different concentration (0, 0.1, 1, 10 and 100 mg/L) of ZnO, CuO and ZnO+CuO NPs in the OECD media at after 96 hours at different ratios.** Error bars indicate one standard deviation value of three replicates around average values; \*: significance ( $p < 0.05$ ).

Figure C.3 shows the total biomass of various samples at different concentrations of ZnO, CuO and CuO+ZnO NPs after 96 hours at different ratios. At 0.1 mg/L concentration of NPs in the mixture samples, the decrease in the total biomass after 96 hours in OECD media at different ratio of algae-bacteria (1:100, 100:1, 1:1) was found to be  $44.74 \pm 1.31\%$ ,  $43.91 \pm 0.67\%$  and  $46.85 \pm 1.11\%$  respectively. At 1 mg/L concentration of NPs in the mixture samples, the reduction in the total biomass after 96 hours in OECD media at different ratio of algae-bacteria (1:100, 100:1, 1:1) was found to be  $45.51 \pm 1.23\%$ ,  $53.12 \pm 1.73\%$  and  $51.99 \pm 0.93\%$  respectively.

At 100 mg/L concentration of NPs in the mixture samples, decrease in the total biomass after 96 hours in OECD media at different ratio of algae-bacteria (1:100, 100:1, 1:1) was found to be  $61.45 \pm 1.83\%$ ,  $62.67 \pm 0.63\%$  and  $61.51 \pm 0.62\%$  respectively. For the samples containing OECD media, one-way ANOVA result shows effect of ratio on mixture of NPs ( $p < 0.05$ ) indicating effect of various concentration on total biomass having in all the three ratios in OECD media. 3-way ANOVA shows that, there was a significant effect of concentration, nanoparticles type and ratio on total biomass.



For the single NPs (CuO NPs and ZnO NPs) in algae-bacteria samples at different ratios (0, 0.1, 1, 10 and 100 mg/L) at different concentrations after 96 hours, total biomass shown in Figure 5. For 0.1 mg/L concentration, decrease in the total biomass in the samples containing CuO NPs in OECD media having algae-bacteria at different concentration (1:100, 100:1, 1:1) was observed to be  $54.51 \pm 1.63\%$ ,  $49.32 \pm 0.34\%$  and  $47.97 \pm 1.37\%$  respectively. For 0.1 mg/L of ZnO NPs, the reduction in total biomass was found to be  $50.80 \pm 1.18\%$ ,  $50.06 \pm 2.13\%$  and  $49.57 \pm 1.12\%$  respectively. For 100 mg/L concentration, the decrease in the total biomass in the samples containing CuO NPs in OECD media having algae-bacteria at different concentration (1:100, 100:1, 1:1) was observed to be  $67.49 \pm 1.06\%$ ,  $67.83 \pm 1.93\%$  and  $70.36 \pm 1.18\%$  respectively. For 100 mg/L concentration, the reduction in the total biomass in the samples containing ZnO NPs in OECD media having algae-bacteria at different concentration (1:100, 100:1, 1:1) was observed to be  $64.41 \pm 2.13\%$ ,  $67.35 \pm 1.19\%$  and  $67.89 \pm 1.59\%$  respectively. For the samples containing algae-bacteria in the OECD media, one-way ANOVA shows the significant effect on the total biomass on all the concentrations at different ratios. 3-way ANOVA results shows that there was significant effect on total biomass w.r.t concentration, ratio, and nanoparticles. The maximum decrease in the sample in total biomass was observed to be in the ratio 1:1 followed by 100:1 and 1:100 in all the samples containing single and mixture of NPs.

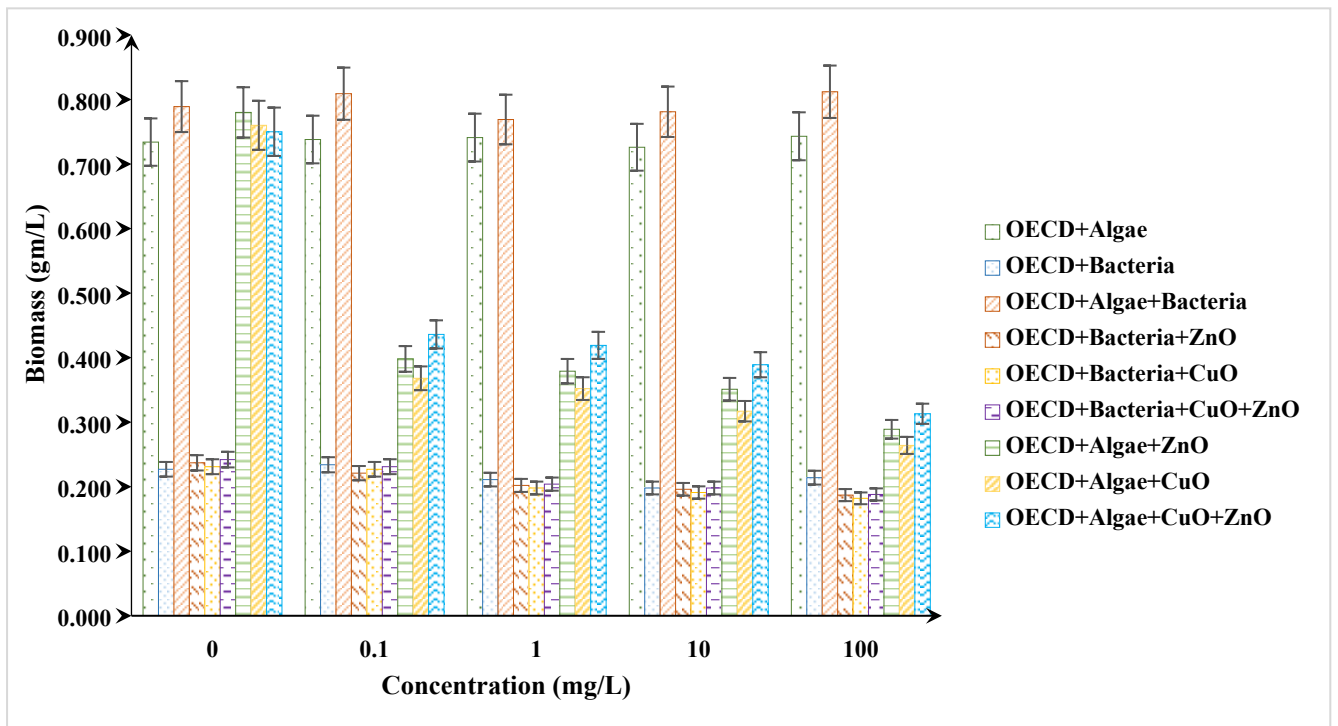

Figure C.2.5: Biomass in the sample containing different concentrations of nanoparticles at algae-bacteria ratio (1:100).

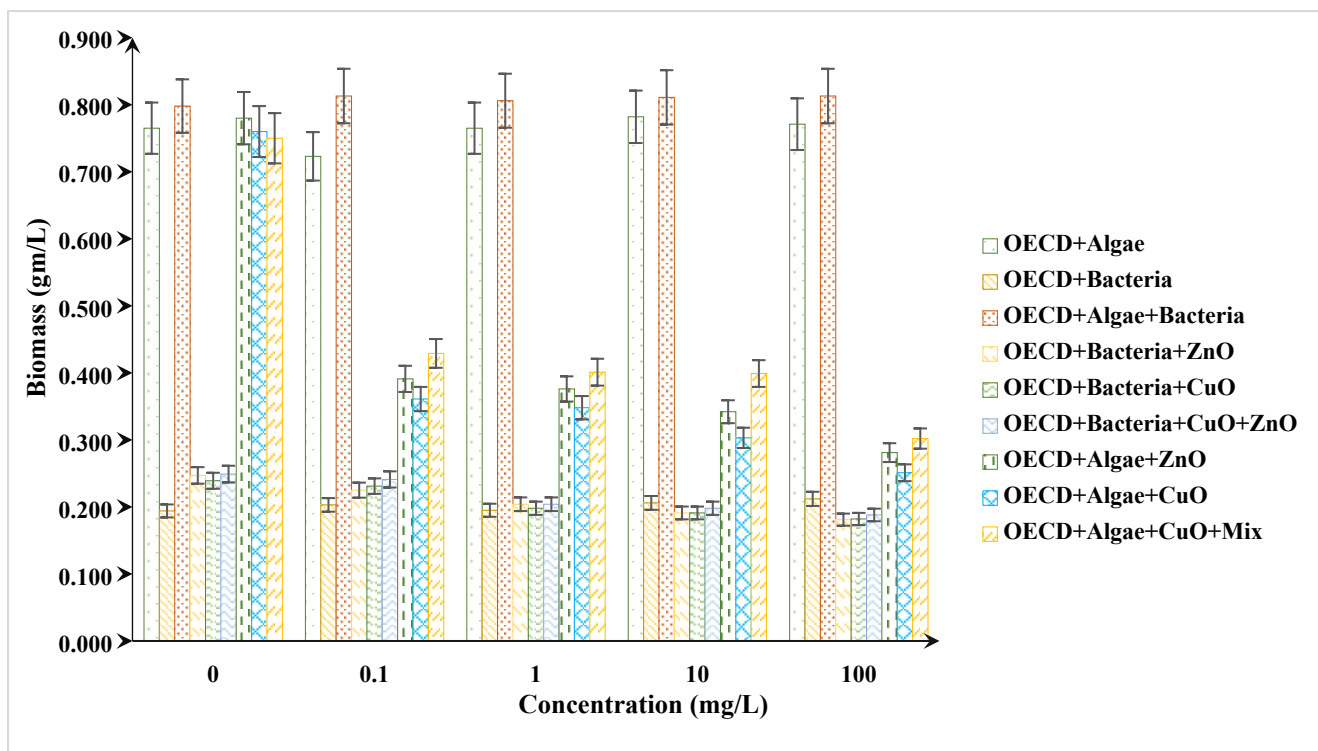

Figure C.2.6: Biomass in the sample containing different concentrations of nanoparticles at algae-bacteria ratio (1:1).

### 3.3. Effect on algae-bacteria consortia

#### *Lipid and Protein content*

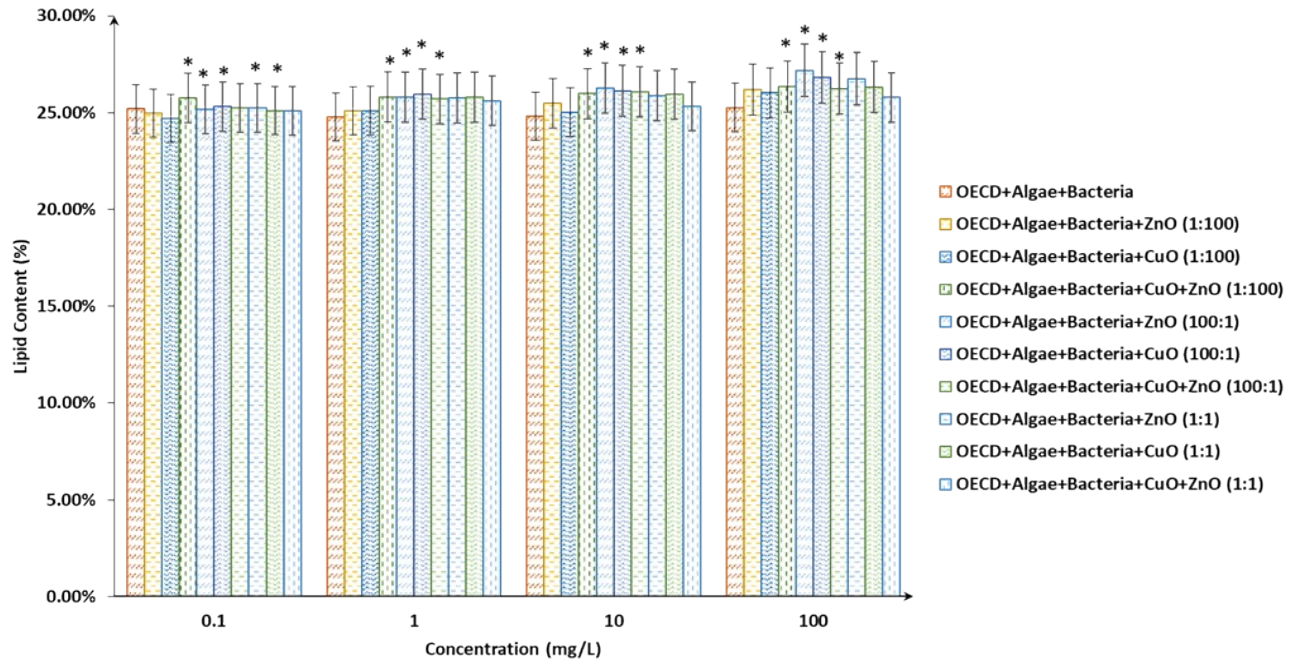

Figure C.3.1: Lipid content (%) in the various samples containing algae+bacteria at different concentration (0, 0.1, 1, 10 and 100 mg/L) of ZnO, CuO and ZnO+CuO NPs in the OECD media at after 96 hours at different ratios. Error bars indicate one standard deviation value of three replicates around average values; \*: significance ( $p < 0.05$ ).

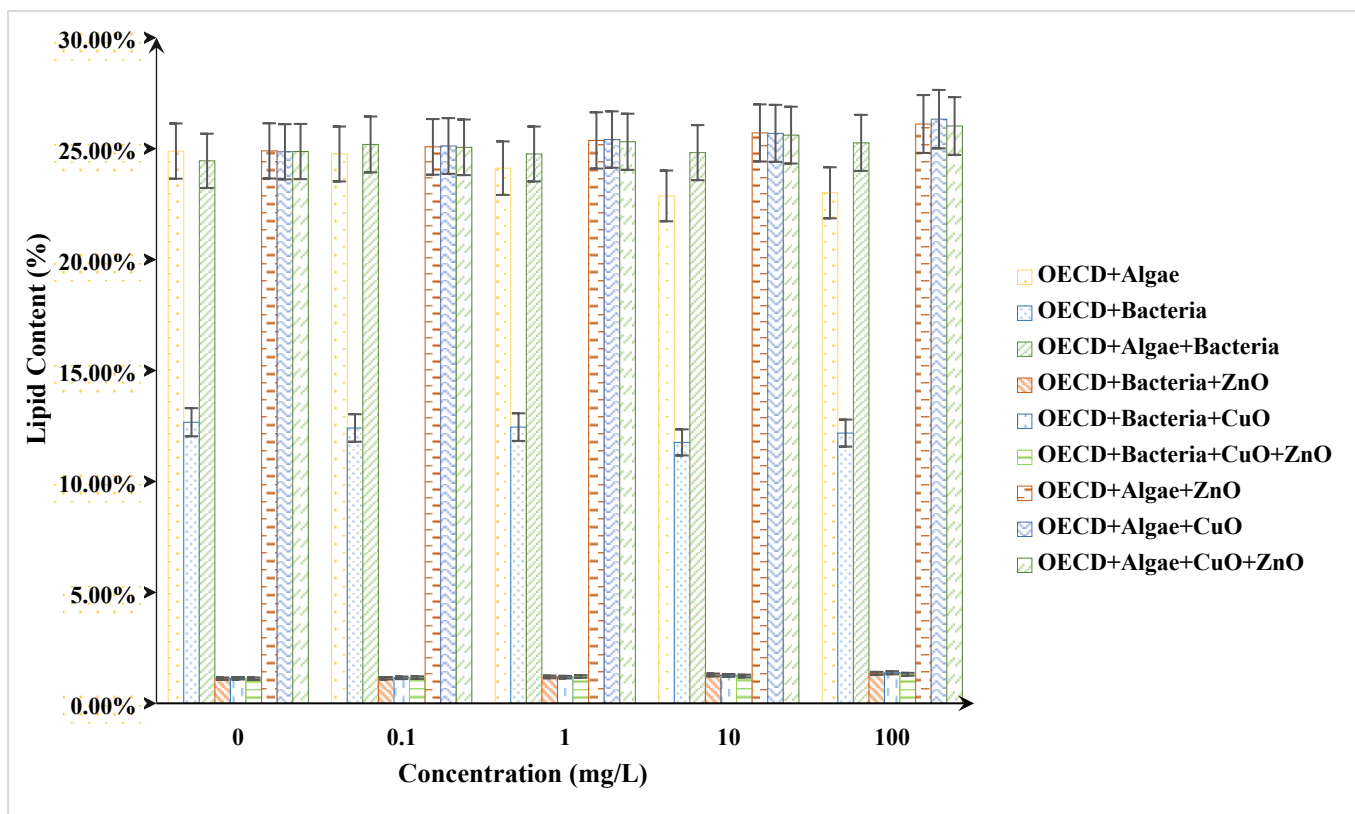

Figure C.3.2: Lipid content in the sample containing different concentrations of nanoparticles at algae-bacteria ratio (1:100).

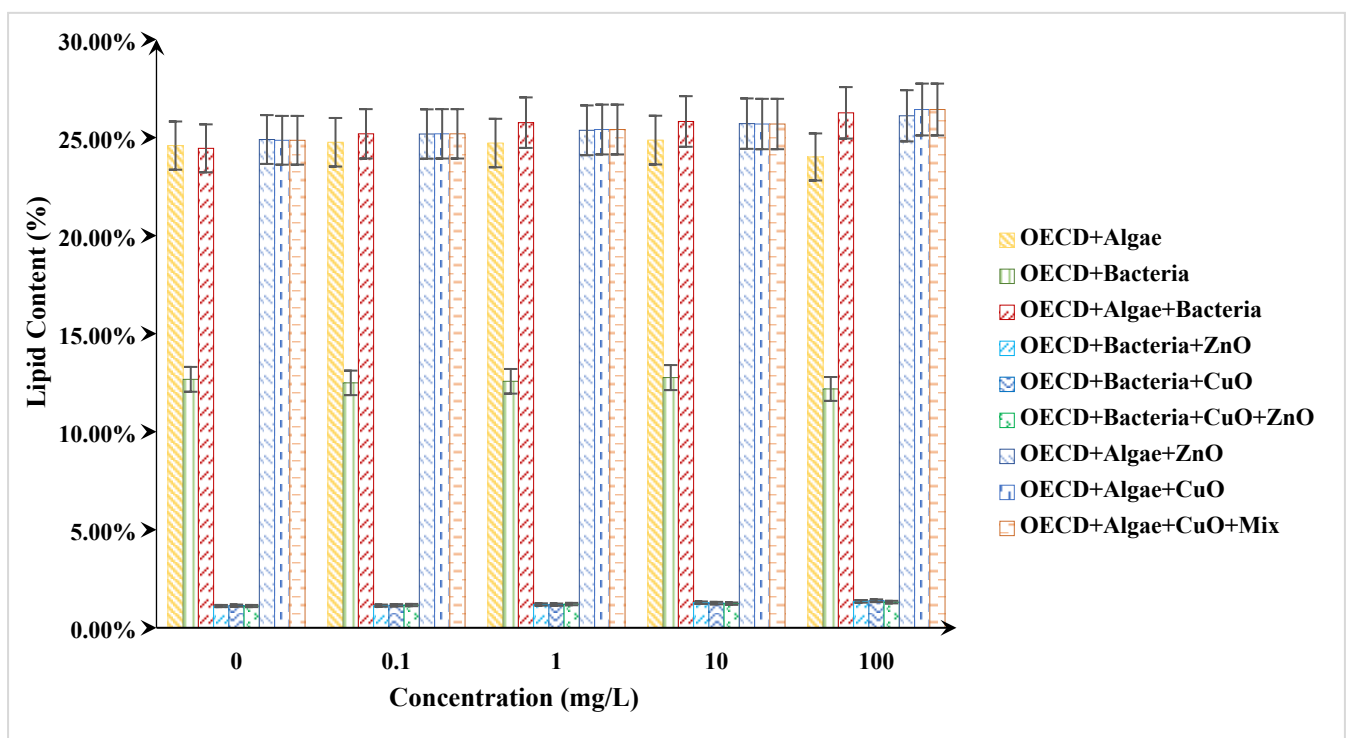

Figure C.3.3: Lipid content in the sample containing different concentrations of nanoparticles at algae-bacteria ratio (1:1).

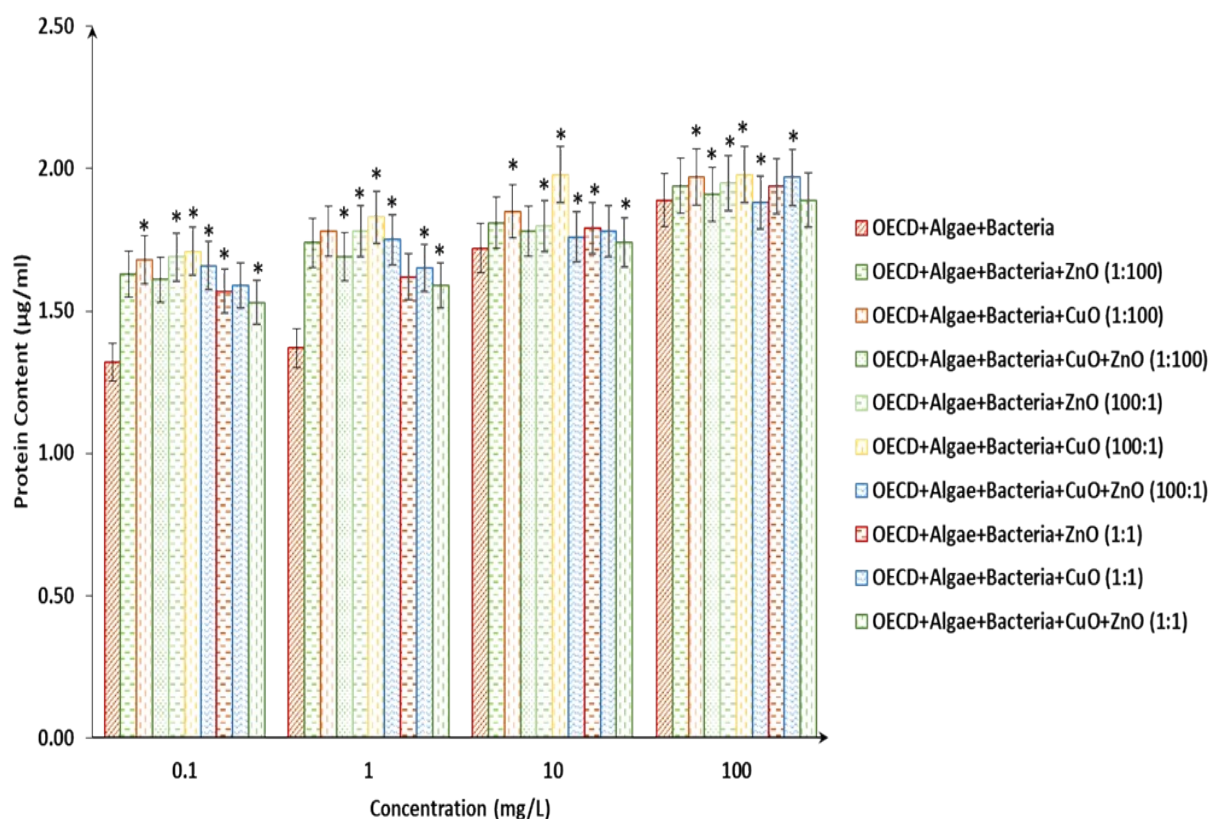

**Figure C.3.4: Protein content in the various samples containing algae+bacteria at different concentration (0, 0.1, 1, 10 and 100 mg/L) of ZnO, CuO and ZnO+CuO NPs in the OECD media at after 96 hours at different ratios. Error bars indicate one standard deviation value of three replicates around average values; \*: significance ( $p < 0.05$ ).**

Figure C.4 shows the protein content in all the samples at different ratios. At 0.1 mg/L concentration of NPs in the mixture samples, the increase in the protein content after 96 hours in OECD media at different ratio of algae-bacteria (1:100, 100:1, 1:1) was found to be  $18.02 \pm 1.63\%$ ,  $23.49 \pm 1.15\%$  and  $7.19 \pm 1.73\%$  respectively. At 1 mg/L concentration of NPs in the mixture samples, the increase in the protein content after 96 hours in OECD media at different ratio of algae-bacteria (1:100, 100:1, 1:1) was found to be  $18.94 \pm 1.64\%$ ,  $21.14 \pm 1.53\%$  and  $10.06 \pm 2.09\%$  respectively. At 100 mg/L concentration of NPs in the mixture samples, increase in the protein content after 96 hours in OECD media at different ratio of algae-bacteria (1:100, 100:1, 1:1) was found to be  $1.05 \pm 1.49\%$ ,  $22.34 \pm 1.54\%$  and  $23.28 \pm 1.47\%$  respectively. For the samples containing OECD media, one-way ANOVA result shows effect of ratio on mixture of NPs ( $p < 0.05$ ) indicating effect of various concentration on protein content having in all the three ratios in OECD media. 3-way ANOVA shows that, there was a significant effect of concentration, nanoparticles type and ratio on protein content.



For the single NPs (CuO NPs and ZnO NPs) in algae-bacteria samples at different ratios (0, 0.1, 1, 10 and 100 mg/L) at different concentrations after 96 hours, protein content shown in Figure 7. For 0.1 mg/L concentration, increase in the protein content in the samples containing CuO NPs in OECD media having algae-bacteria at different concentration (1:100, 100:1, 1:1) was observed to be  $21.43 \pm 1.74\%$ ,  $25.73 \pm 1.37\%$  and  $10.69 \pm 1.39\%$  respectively. For 0.1 mg/L of ZnO NPs, the increase in the protein content was found to be  $19.02 \pm 1.41\%$ ,  $25.85 \pm 2.21\%$  and  $9.55 \pm 2.31\%$  respectively. For 100 mg/L concentration, the increase in the protein content in the samples containing CuO NPs in OECD media having algae-bacteria at different concentration (1:100, 100:1, 1:1) was observed to be  $4.06 \pm 1.59\%$ ,  $26.26 \pm 1.73\%$  and  $26.39 \pm 2.03\%$  respectively. For 100 mg/L concentration, the increase in the protein content in the samples containing ZnO NPs in OECD media having algae-bacteria at different concentration (1:100, 100:1, 1:1) was observed to be  $2.63 \pm 0.82\%$ ,  $25.13 \pm 0.99\%$  and  $25.13 \pm 1.04\%$  respectively. For the samples containing algae-bacteria in the OECD media, one-way ANOVA shows the significant effect on the protein content on all the concentrations at different ratios. 3-way ANOVA results shows that there was significant effect on protein content w.r.t concentration, ratio, and nanoparticles.

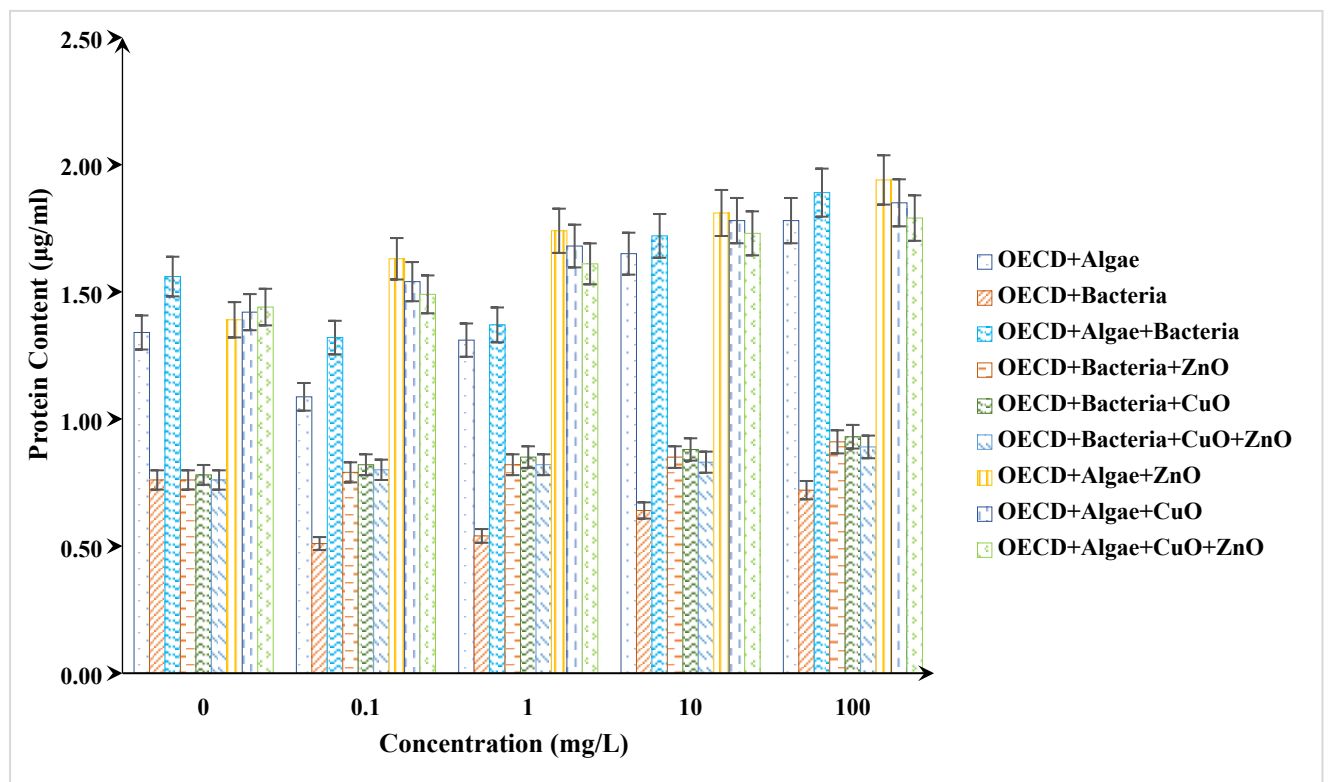

Figure C.3.5: Protein content in the sample containing different concentrations of nanoparticles at algae-bacteria ratio (1:100).

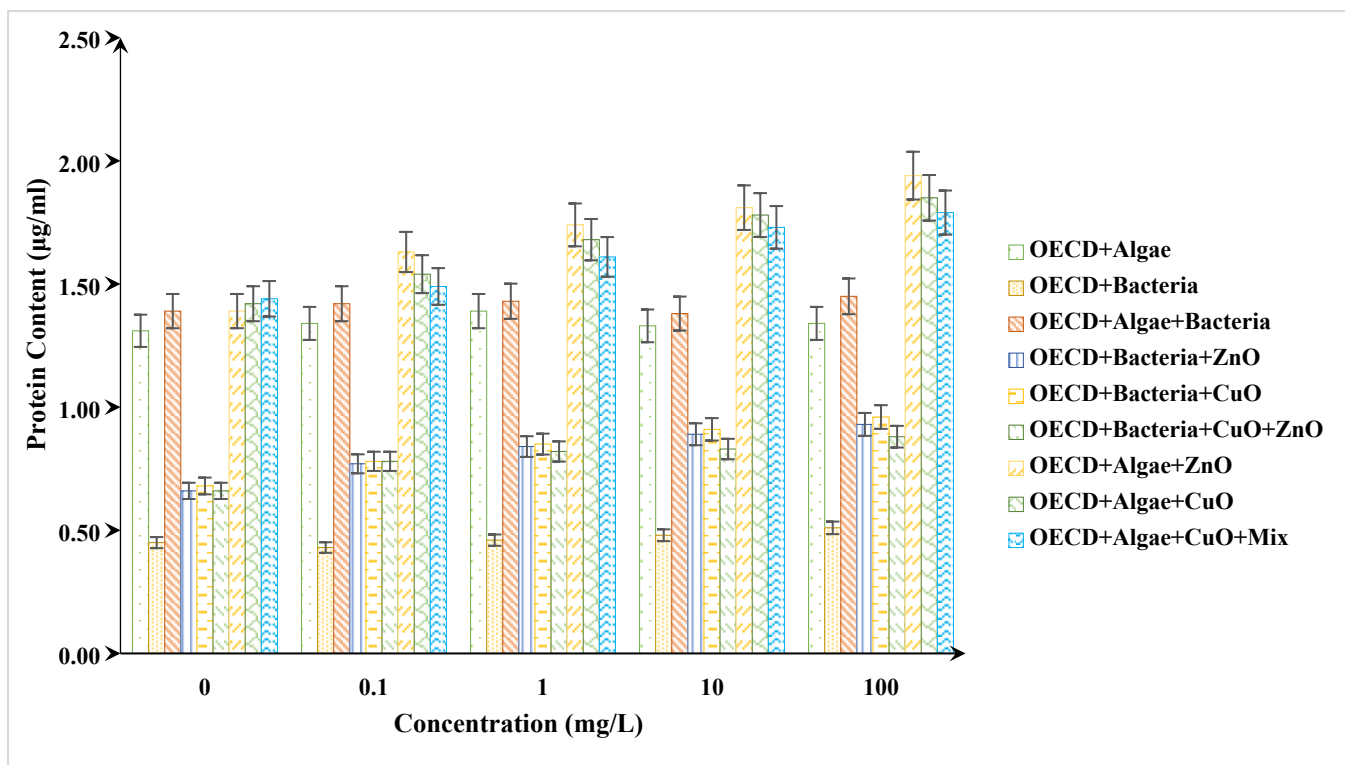

Figure C.3.6: Protein content in the sample containing different concentrations of nanoparticles at algae-bacteria ratio (1:1).

### 3.4 EPS Constituents

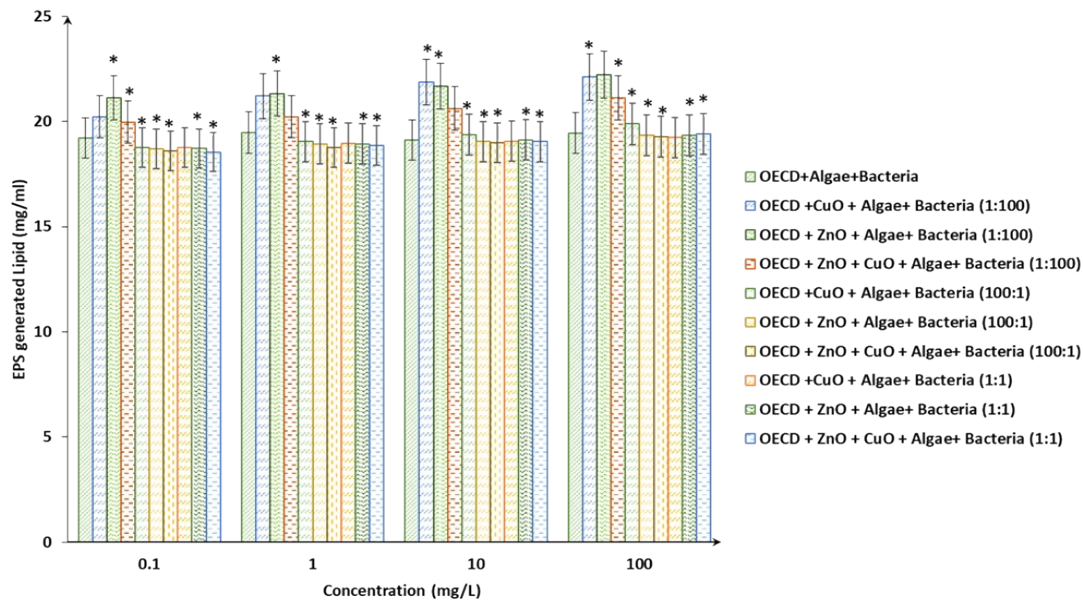

Figure C.4.1: EPS-related lipid in the various samples containing algae+bacteria at different concentration (0, 0.1, 1, 10 and 100 mg/L) of ZnO, CuO and ZnO+CuO NPs in the OECD media at after 96 hours at different ratios. Error bars indicate one standard deviation value of three replicates around average values; \*: significance ( $p < 0.05$ ).

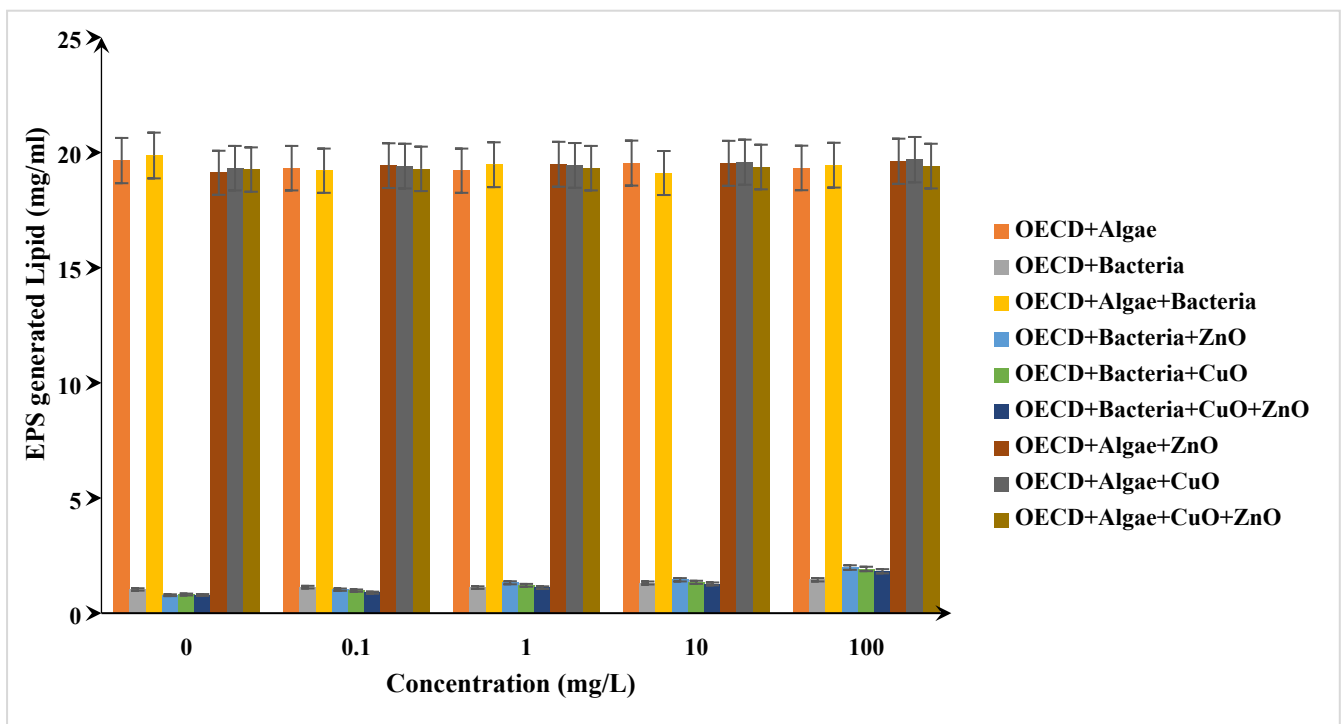

Figure C.4.2: EPS generated lipid in the sample containing different concentrations of nanoparticles at algae-bacteria ratio (1:100).



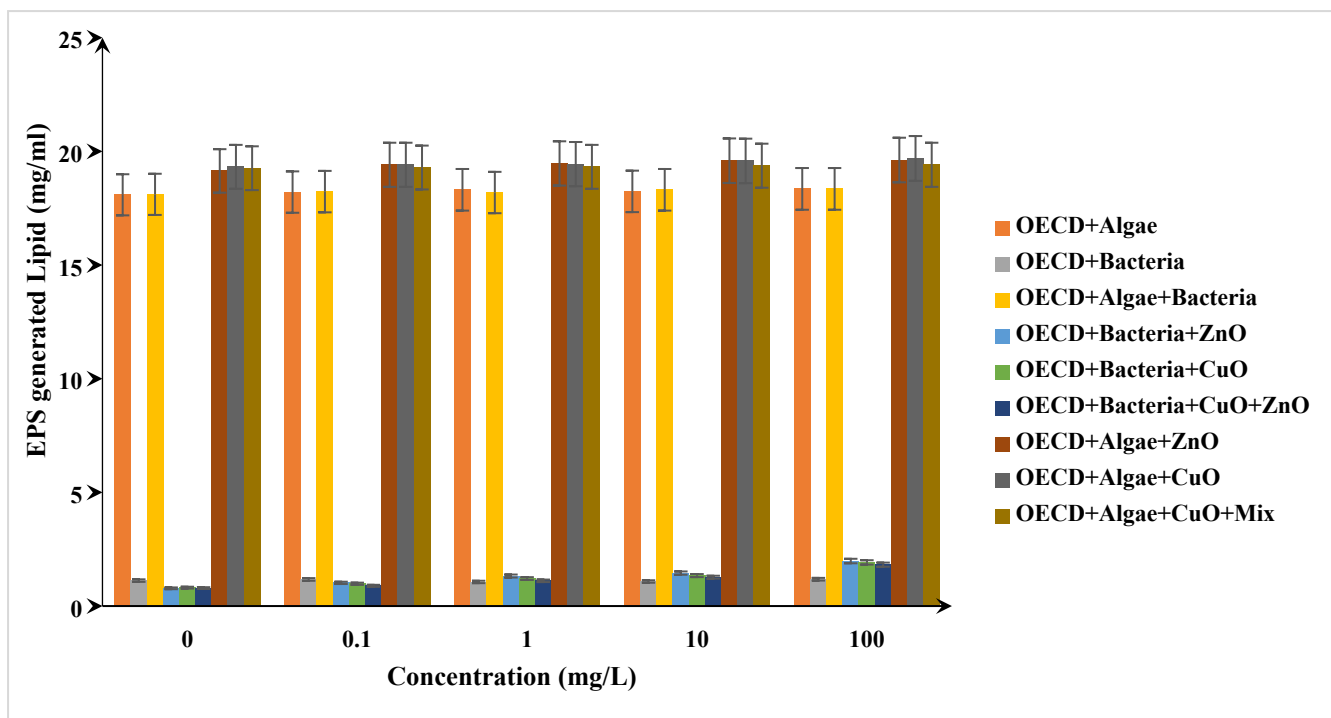

Figure C.4.3: EPS generated lipid in the sample containing different concentrations of nanoparticles at algae-bacteria ratio (1:1).

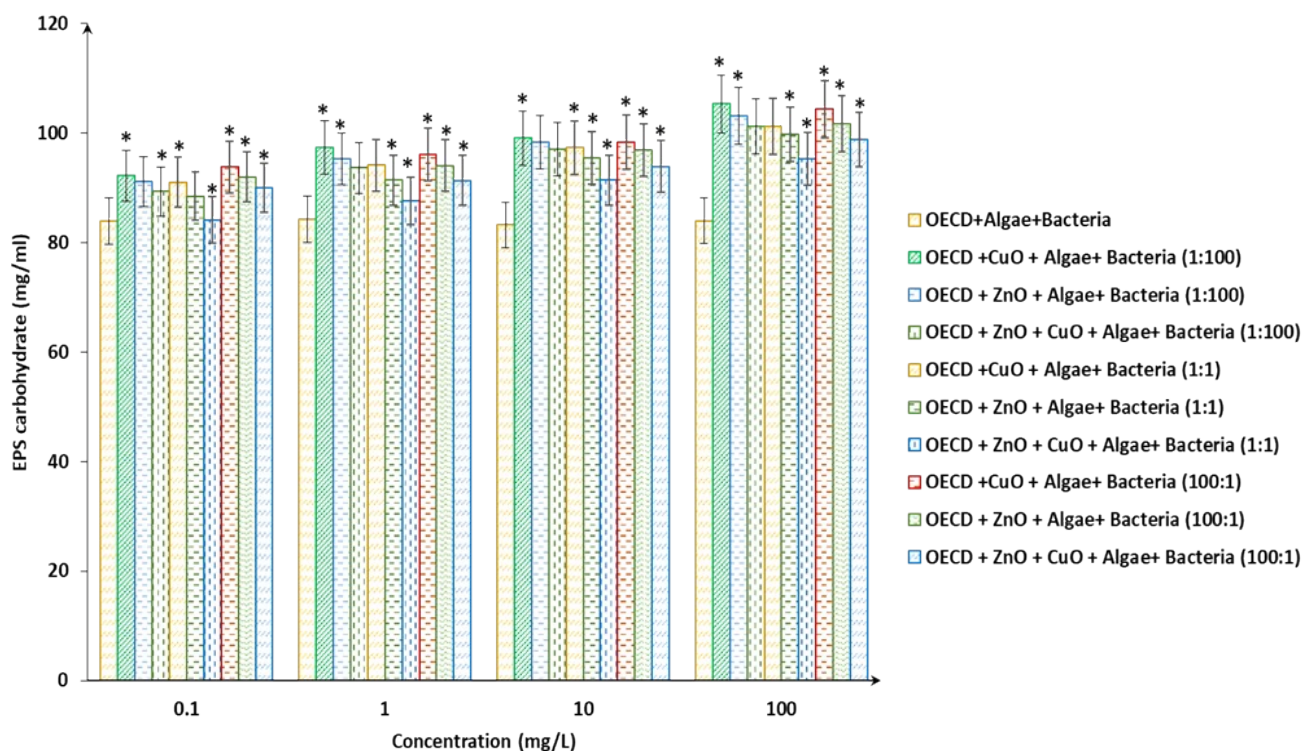

Figure C.4.4: EPS-related carbohydrate in the various samples containing algae+bacteria at different concentration (0, 0.1, 1, 10 and 100 mg/L) of ZnO, CuO and ZnO+CuO NPs in the OECD media at after 96 hours at different ratios. Error bars indicate one standard deviation value of three replicates around average values; \*: significance ( $p < 0.05$ ).

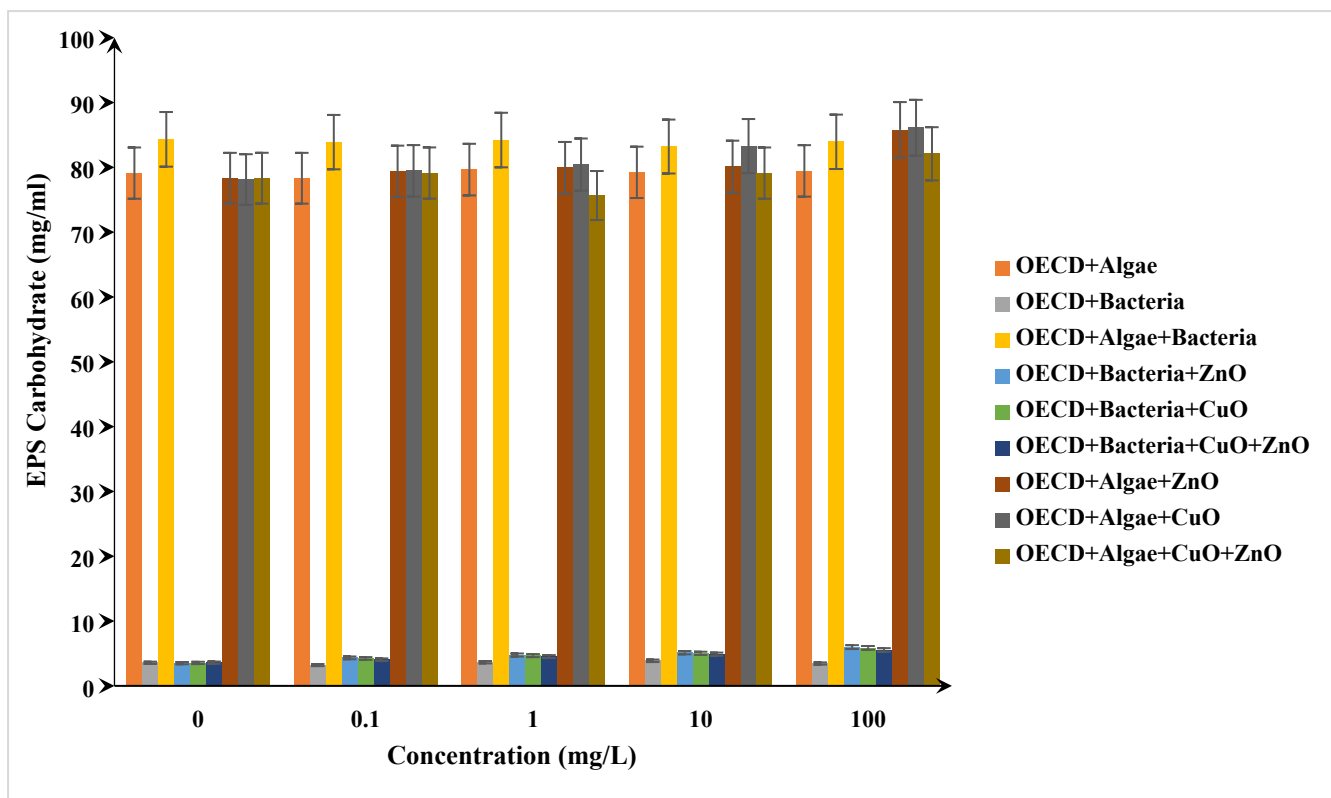

Figure C.4.5: EPS generated carbohydrate in the sample containing different concentrations of nanoparticles at algae-bacteria ratio (1:100).

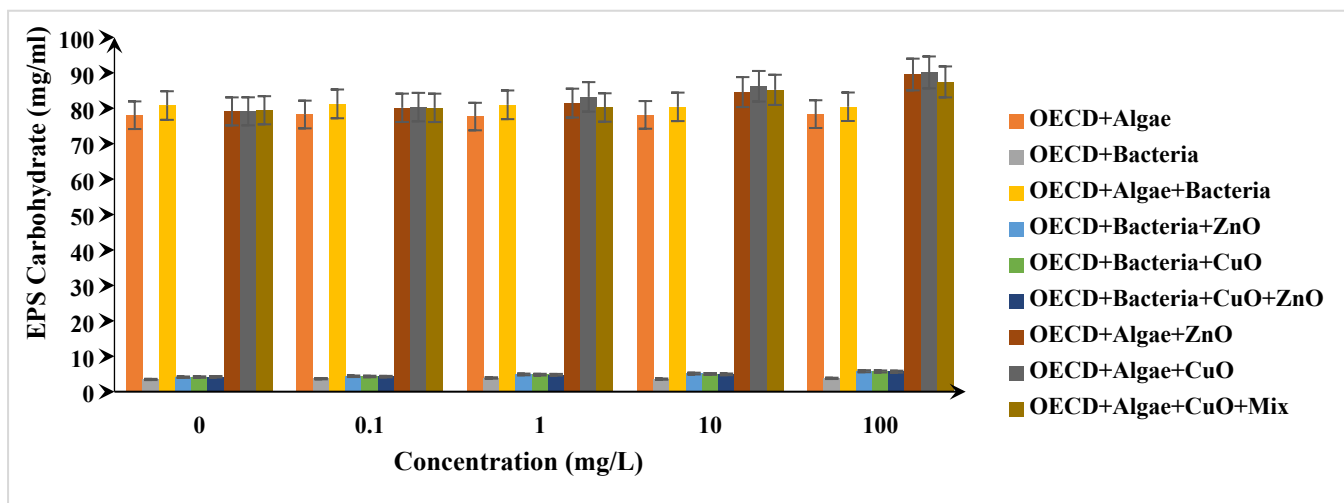

Figure C.4.6: EPS generated carbohydrate in the sample containing different concentrations of nanoparticles at algae-bacteria ratio (1:1).

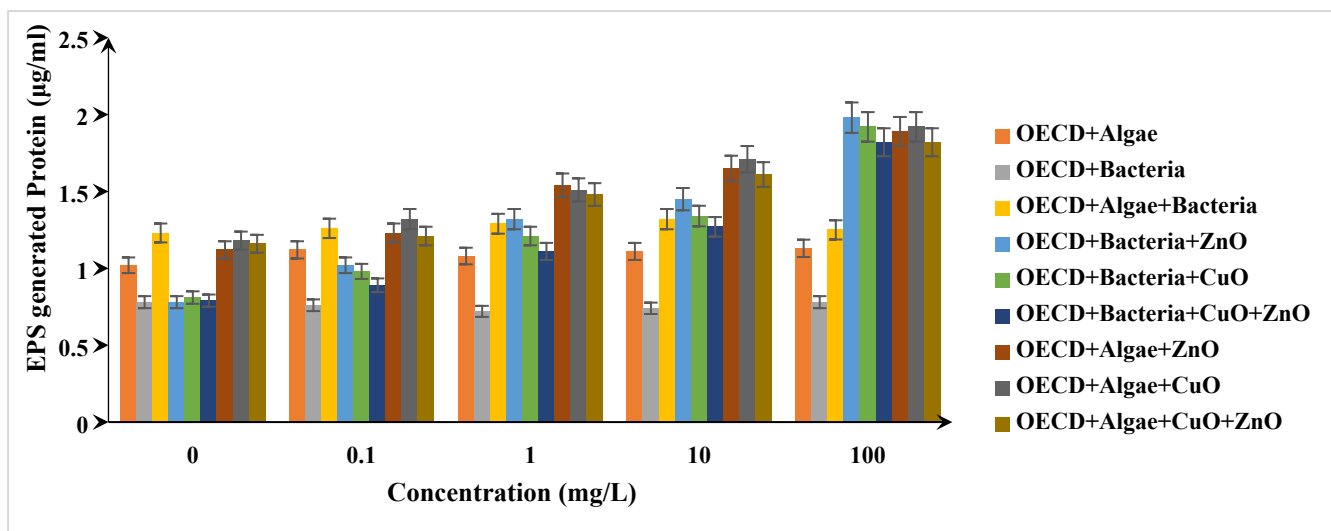

Figure C.4.7: EPS generated protein in the sample containing different concentrations of nanoparticles at algae-bacteria ratio (1:100).

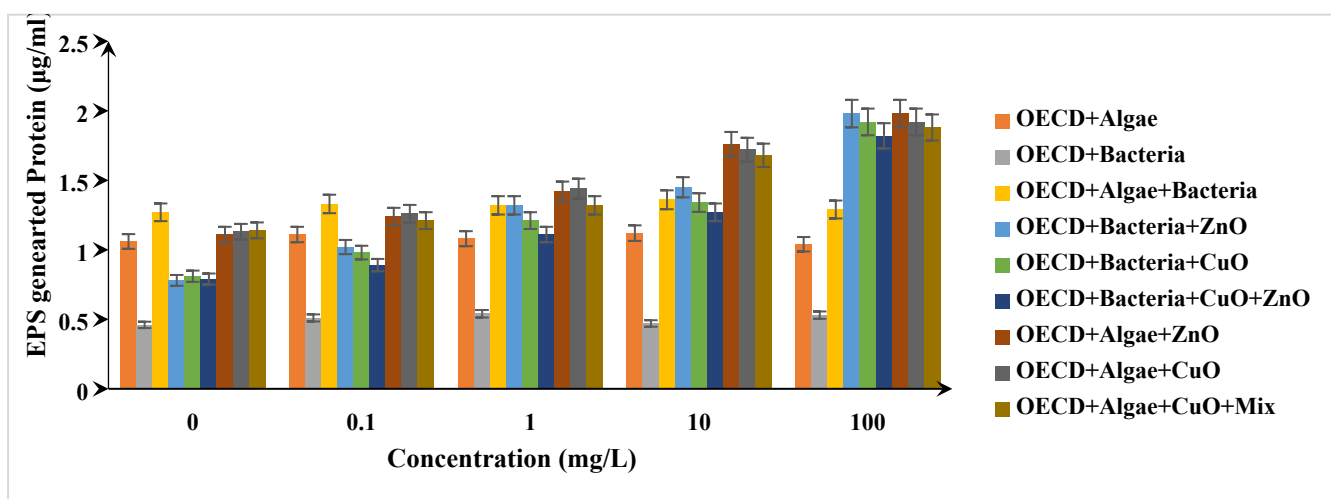

Figure C.4.8: EPS generated protein in the sample containing different concentrations of nanoparticles at algae-bacteria ratio (1:1).

### 3.5 Metal and ion release

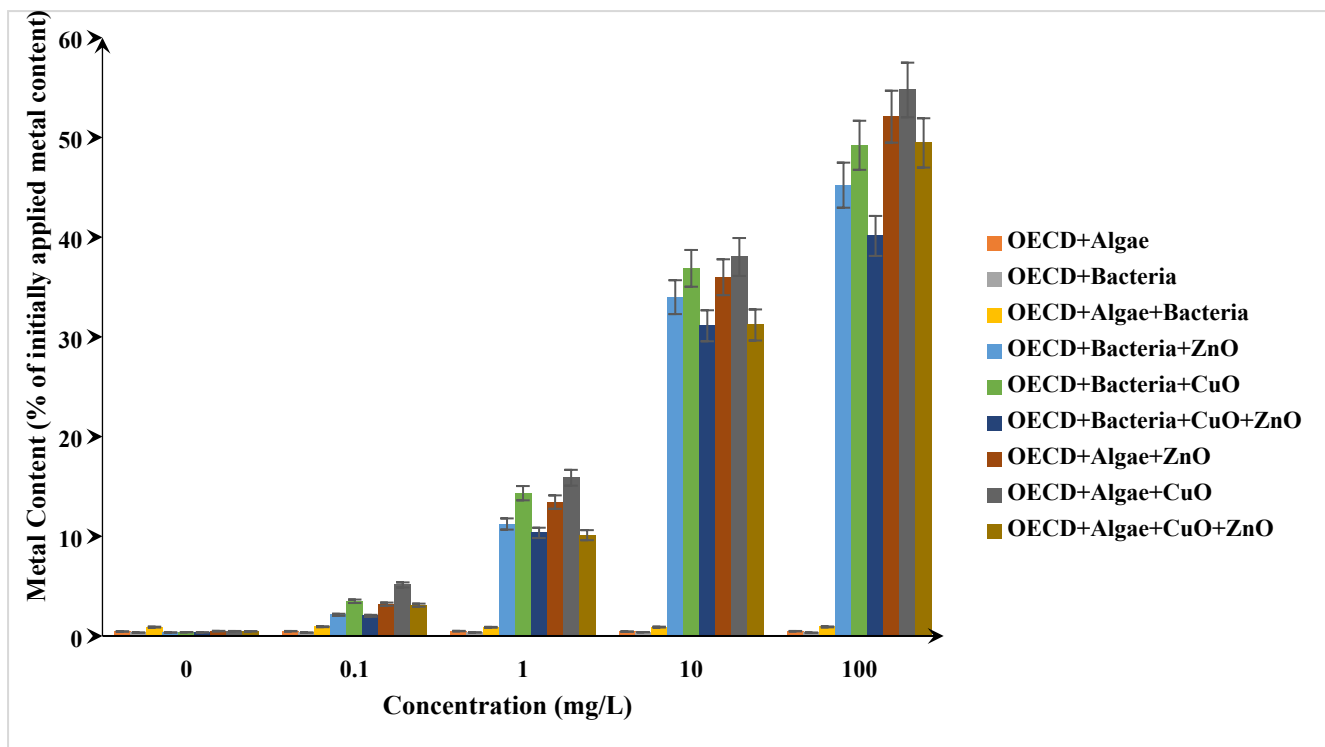

Figure C.5.1: Metal content (% of initially applied metal content) in the sample containing different concentrations of nanoparticles at algae-bacteria ratio (1:100).

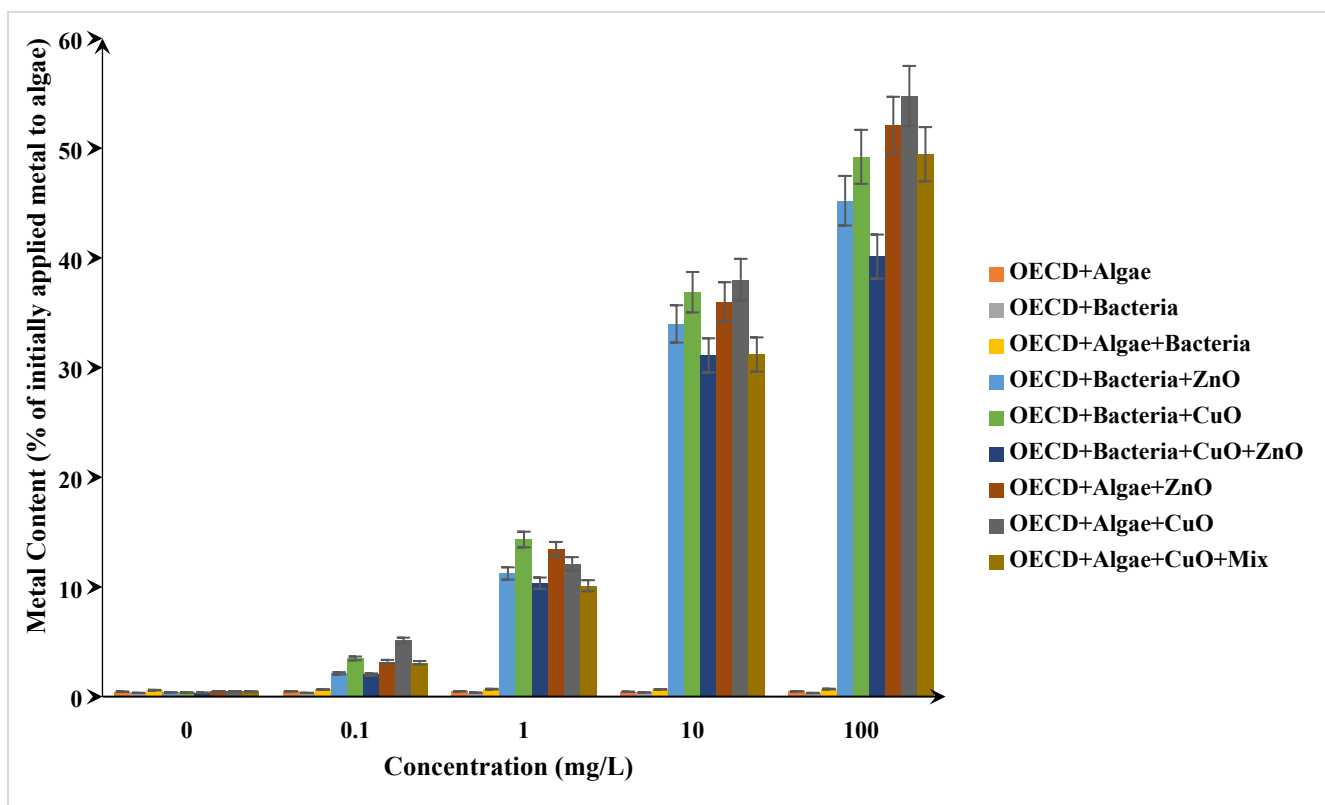

Figure C.5.2: Metal content (% of initially applied metal content) in the sample containing different concentrations of nanoparticles at algae-bacteria ratio (1:1).

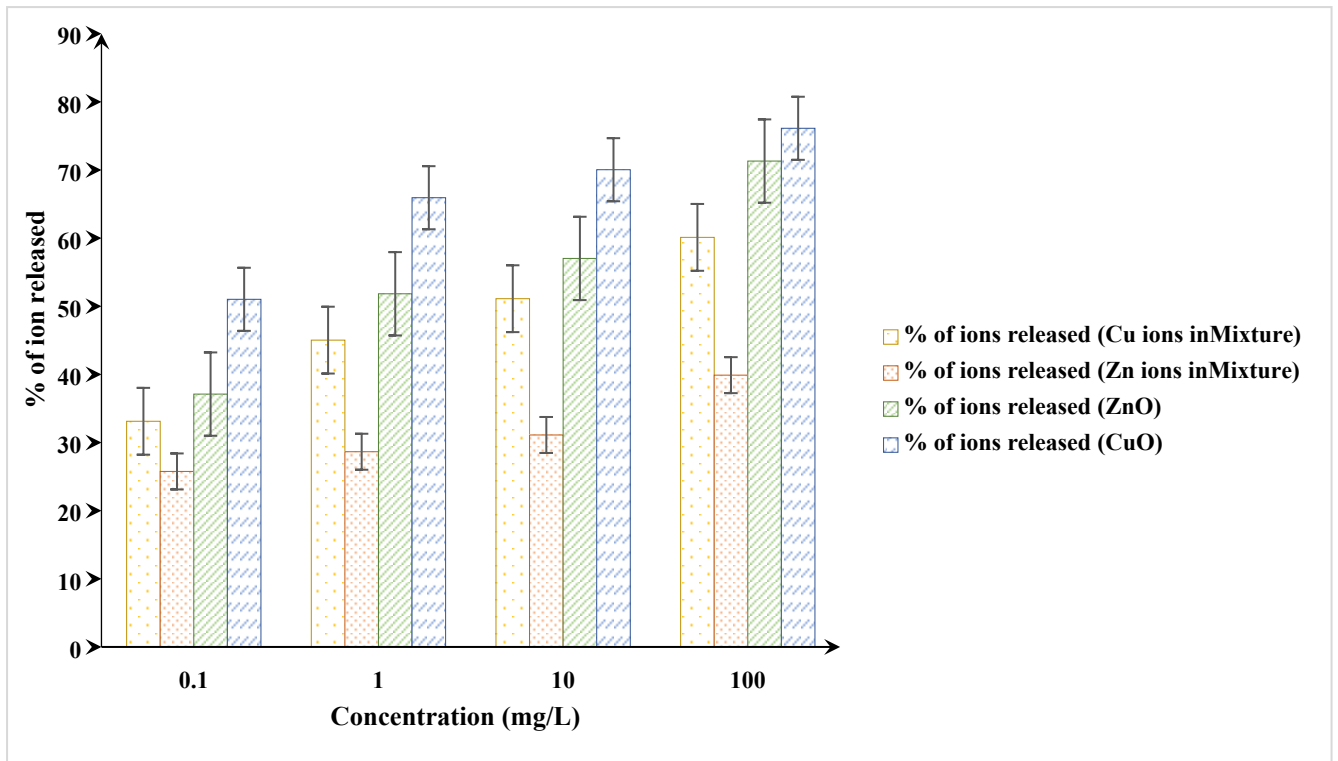

Figure C.5.3: % ion release (% of initially applied metal content) in the sample containing different concentrations of nanoparticles at algae-bacteria ratio (1:100).

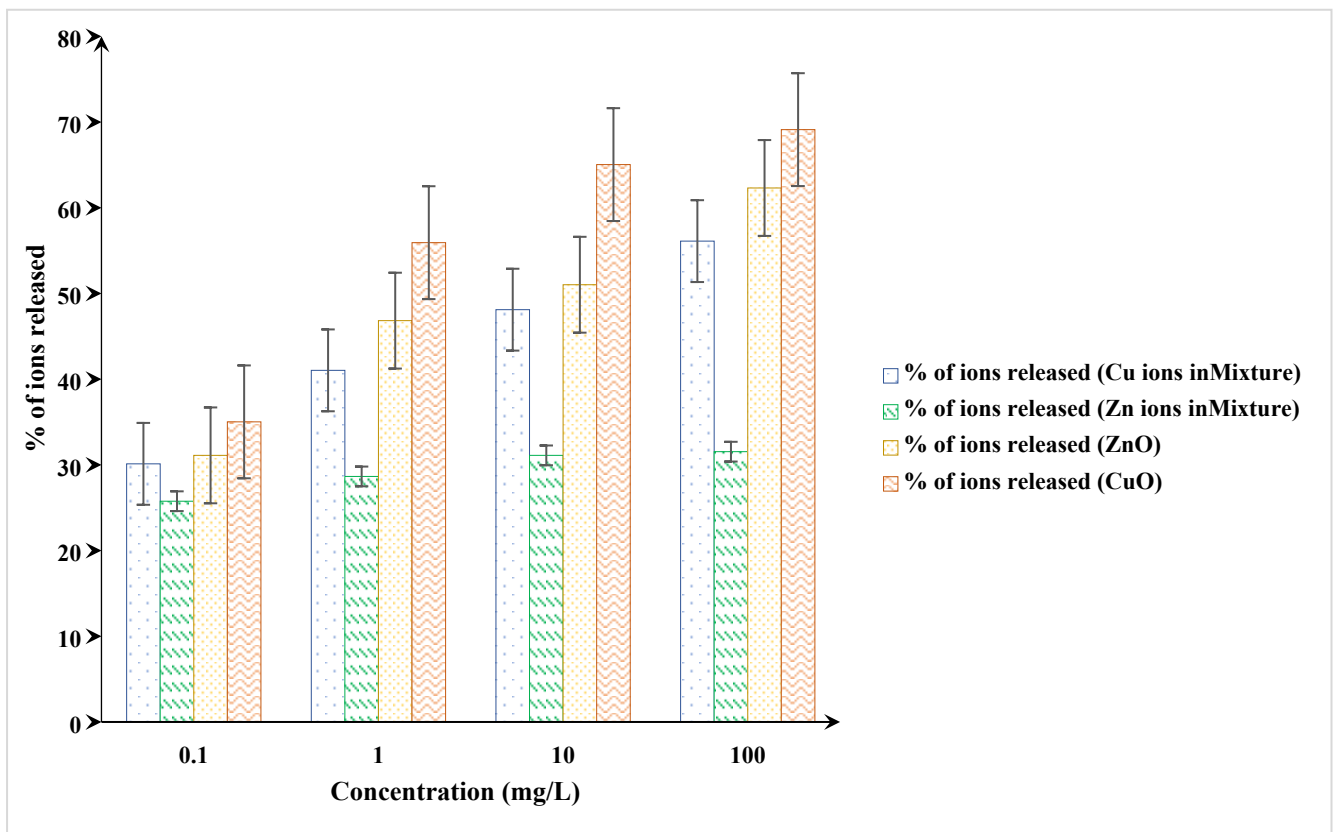

Figure C.5.4: % ion release (% of initially applied metal content) in the sample containing different concentrations of nanoparticles at algae-bacteria ratio (1:1).

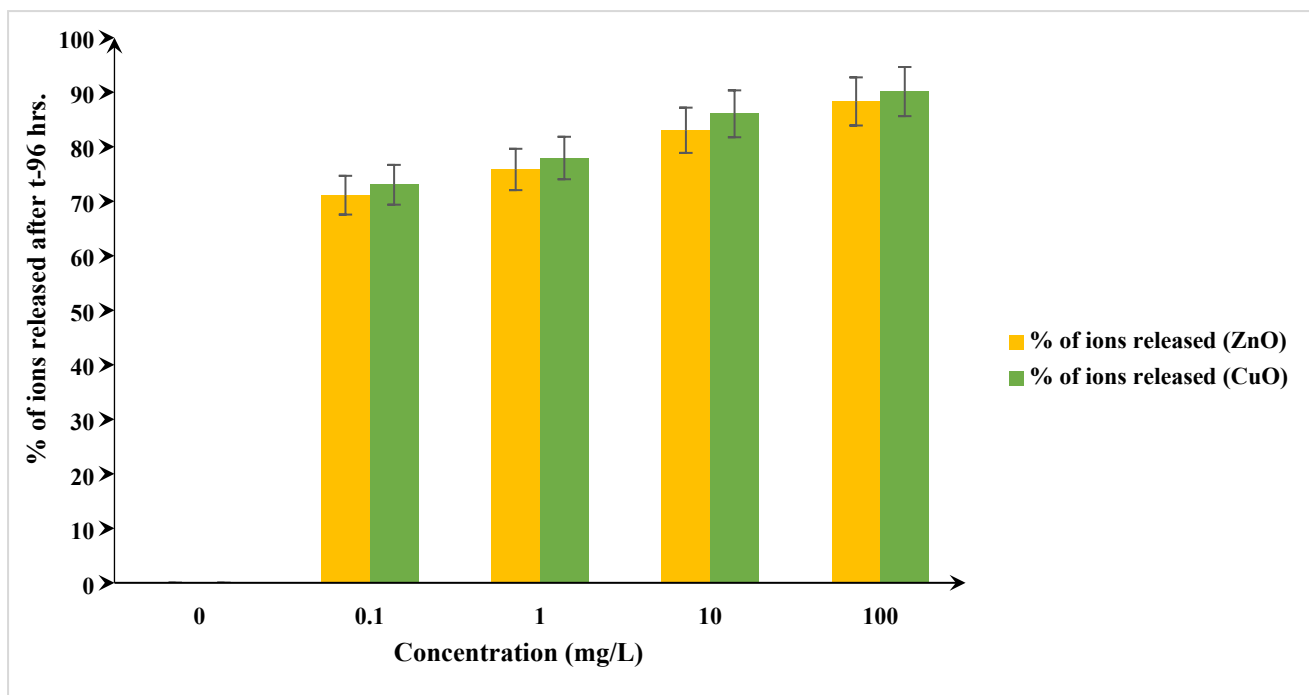

Figure C.5.5: % of ions released after t=96 hours vs. NPs concentrations (mixture as well as single) (0 mg/L, 0.1 mg/L, 1 mg/L, 10 mg/L and 100 mg/L) at different ratio of algae-bacteria consortia (1:100, 100:1 and 1:1). \* Shows the significance among the control samples and samples containing ZnO NPs and CuO alone at different concentrations.

### 3.6 Interrelationship of different parameters

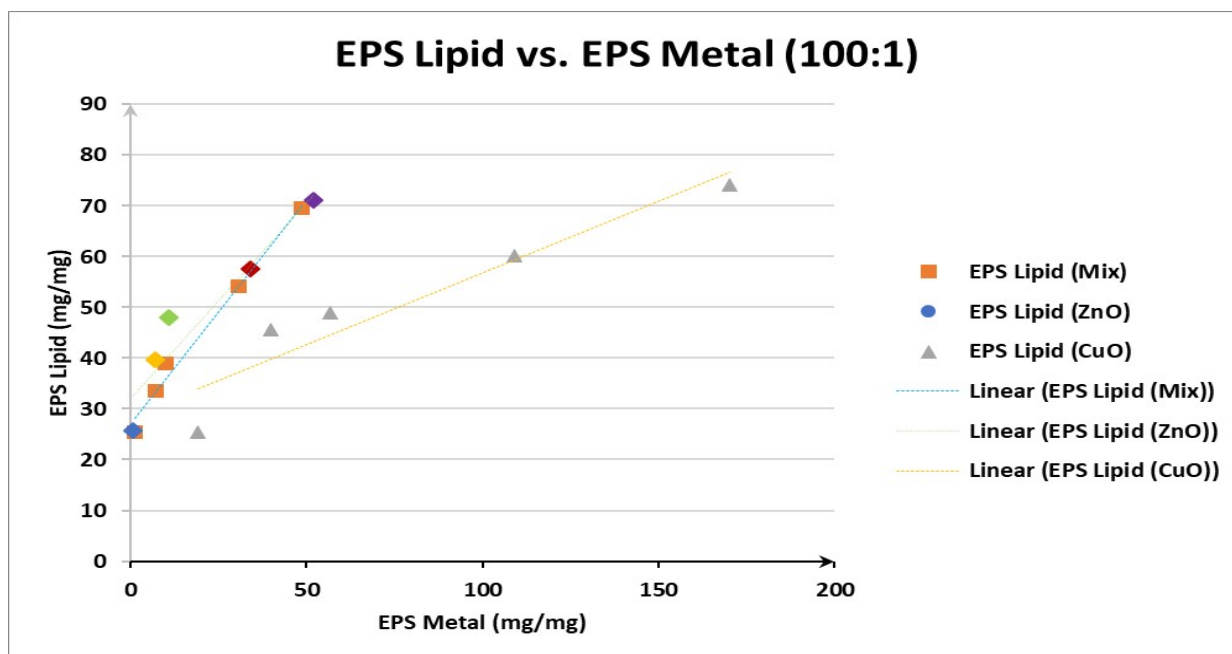

Figure 3.6.1: EPS Lipid (normalised with biomass) (mg/mg) vs. EPS Metal (mg/mg) after t=96 hours at different concentrations (0, 0.1 mg/L, 1 mg/L, 10 mg/L, and 100 mg/L) at 100:1 ratio. All the trend shows R value above 0.9.

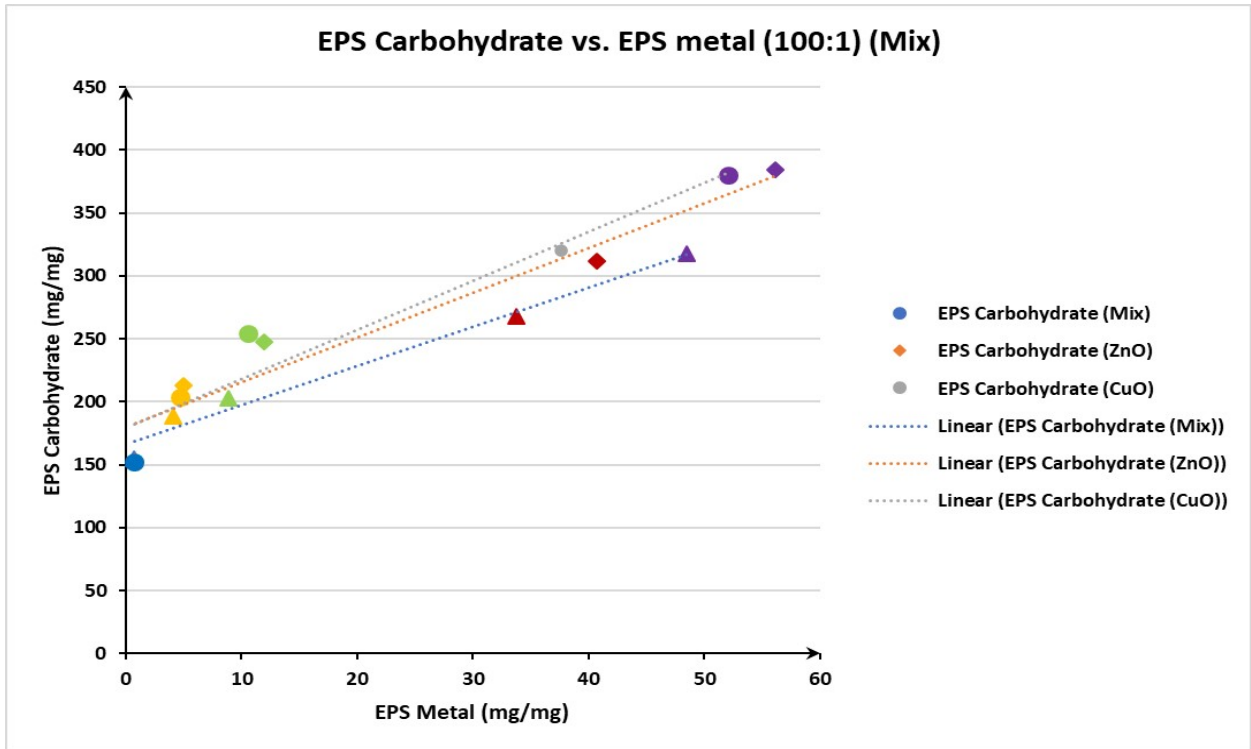

Figure 3.6.2: EPS Carbohydrate (normalised with biomass) (mg/mg) vs. EPS Metal (mg/mg) after  $t=96$  hours at different concentrations (0, 0.1 mg/L, 1 mg/L, 10 mg/L, and 100 mg/L) at 100:1 ratio. Blue colour shows 0 mg/L, yellow colour shows 0.1 mg/L, green colour shows 1 mg/L, red colour shows 10 mg/L, and purple colour shows 100 mg/L. All the trend shows R value above 0.9.

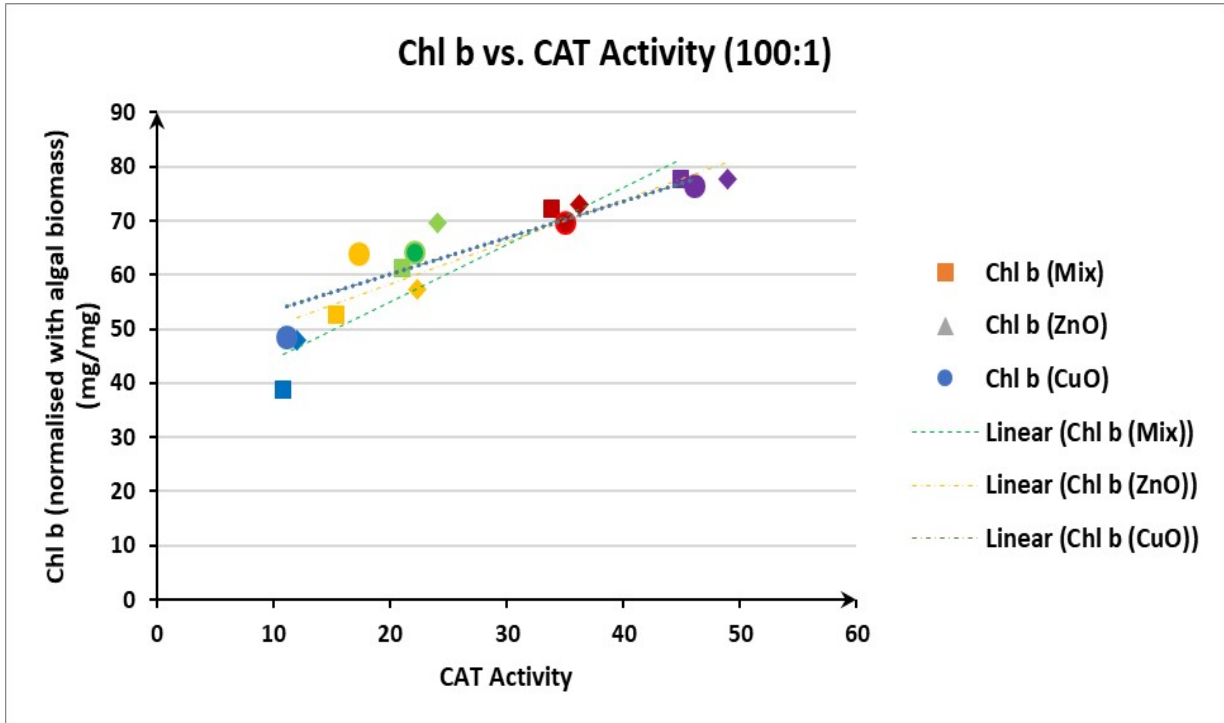

Figure C.6.3: Chl b (normalised with algal biomass) (mg/mg) vs. CAT Activity after  $t=96$  hours at different concentrations (0, 0.1 mg/L, 1 mg/L, 10 mg/L, and 100 mg/L) at 100:1 ratio. R value was found to be above 0.9 for all the samples.

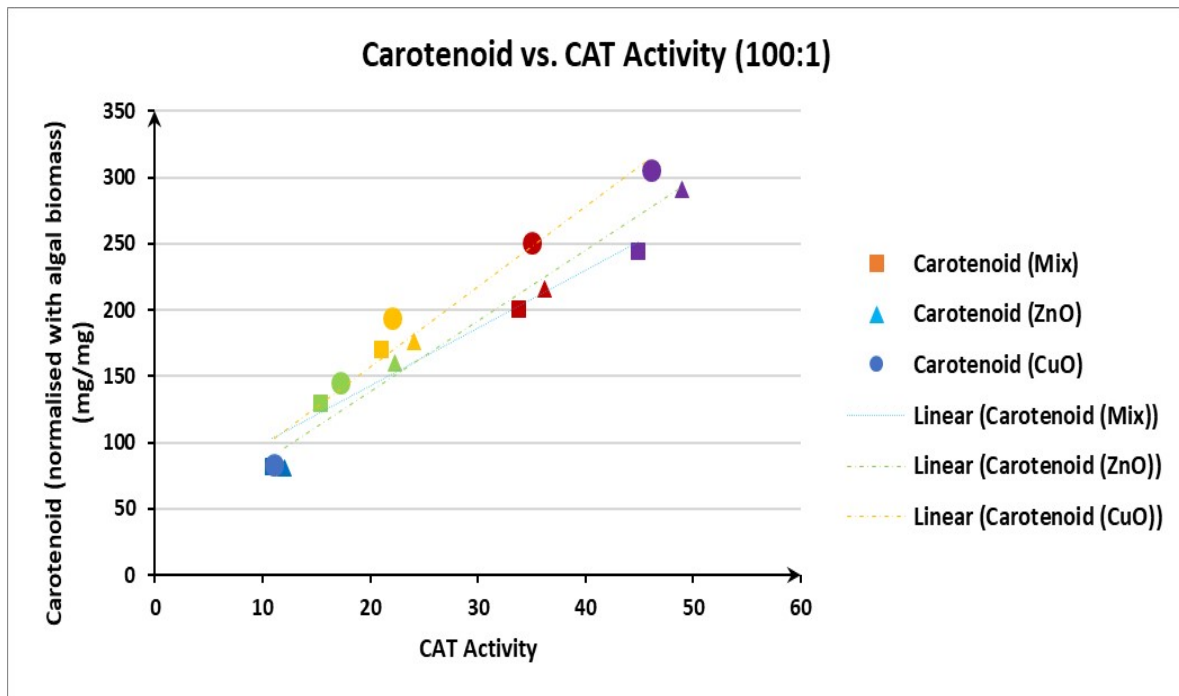

**Figure C.6.4:** Carotenoid (normalised with algal biomass) (mg/mg) vs. CAT Activity after  $t=96$  hours at different concentrations (0, 0.1 mg/L, 1 mg/L, 10 mg/L, and 100 mg/L) at 100:1 ratio. Blue colour shows 0 mg/L, green colour shows 0.1 mg/L, yellow colour shows 1 mg/L, red colour shows 10 mg/L and purple colour shows 100mg/L concentration respectively. All the trend shows R value above 0.9.

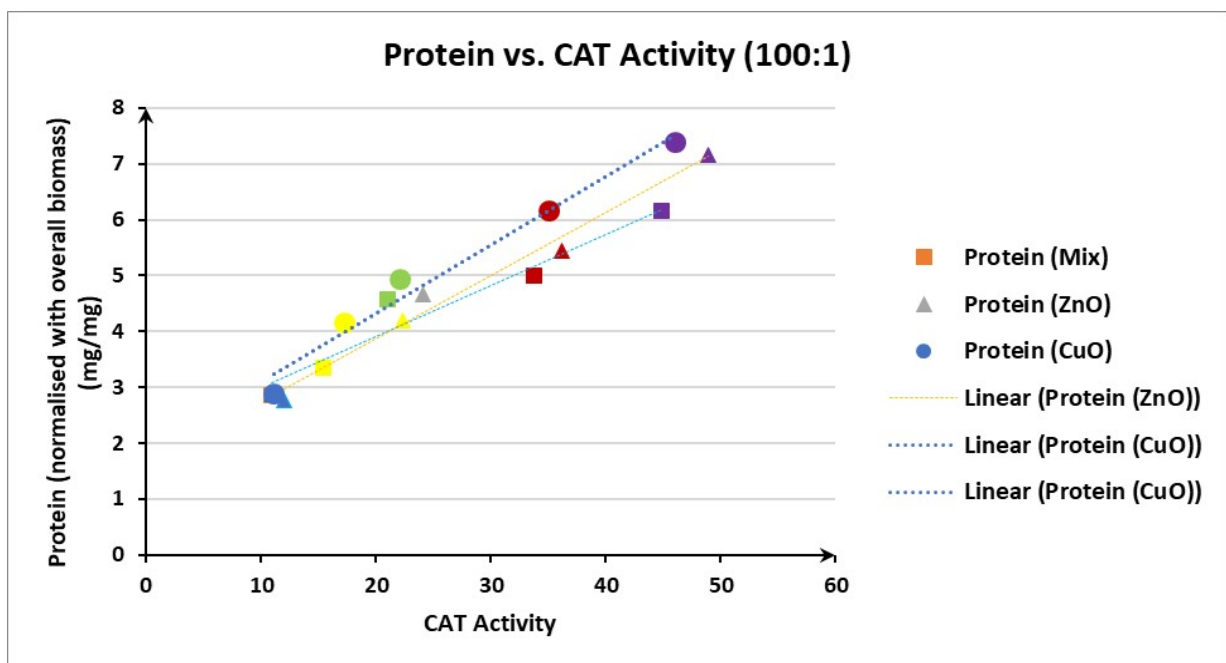

**Figure C.6.5:** Protein content (normalised with algal biomass) (mg/mg) vs. CAT Activity after  $t=96$  hours at different concentrations (0, 0.1 mg/L, 1 mg/L, 10 mg/L, and 100 mg/L) at 100:1 ratio. Blue colour shows 0 mg/L, yellow colour shows 0.1 mg/L, green colour shows 1 mg/L, red colour shows 10 mg/L, and purple colour shows 100 mg/L. All the trend shows R value above 0.9.



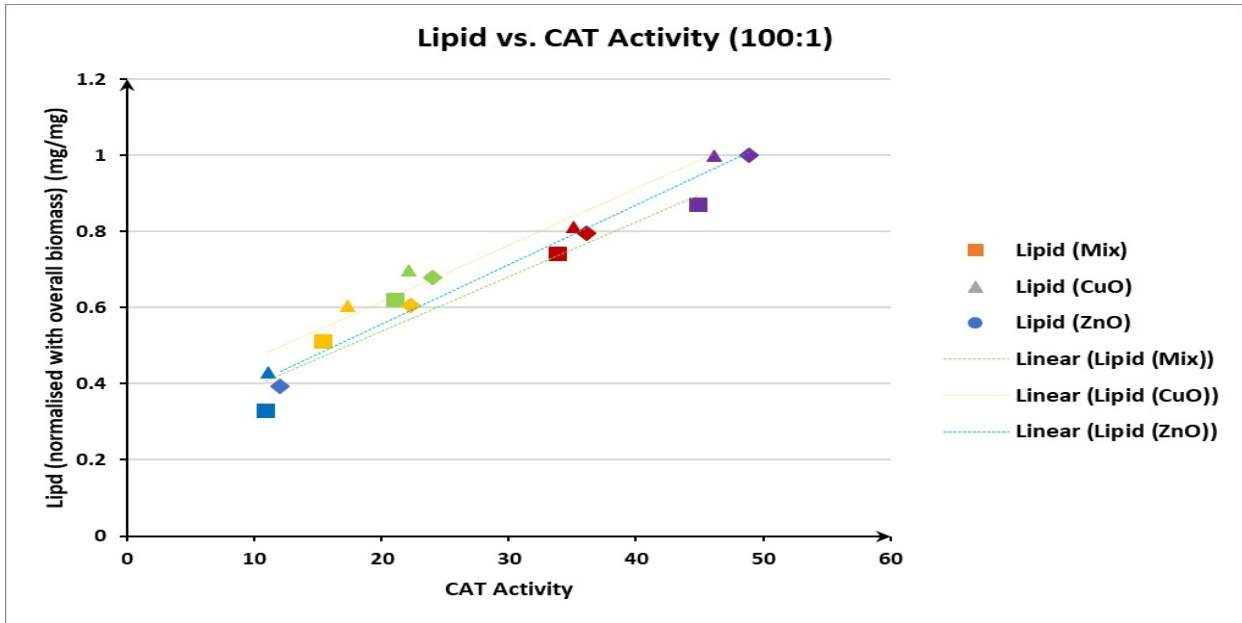

**Figure C.6.6:** Lipid (normalised with algal biomass) (mg/mg) vs. CAT Activity after  $t=96$  hours at different concentrations (0, 0.1 mg/L, 1 mg/L, 10 mg/L, and 100 mg/L) at 100:1 ratio. Blue colour shows 0 mg/L, yellow colour shows 0.1 mg/L, green colour shows 1 mg/L, red colour shows 10 mg/L, and purple colour shows 100 mg/L. All the trend shows R value above 0.9.

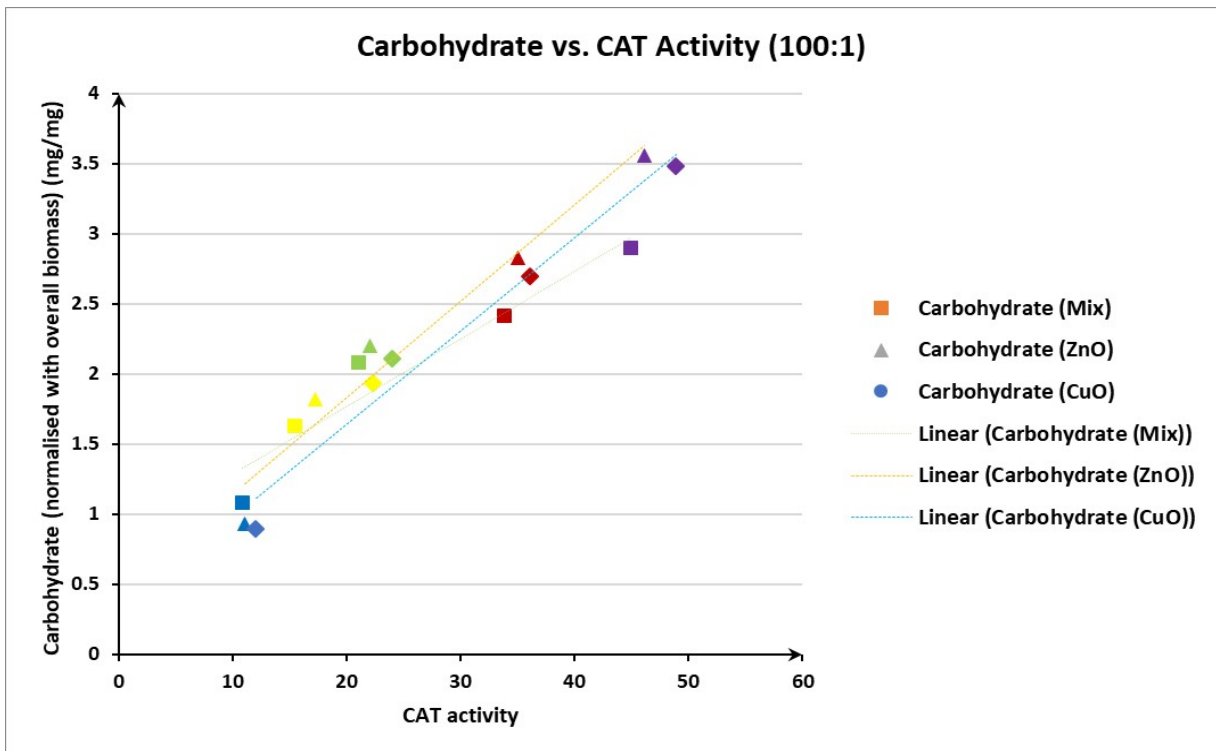

**Figure C.6.7:** Carbohydrate (normalised with algal biomass) (mg/mg) vs. CAT Activity after  $t=96$  hours at different concentrations (0, 0.1 mg/L, 1 mg/L, 10 mg/L, and 100 mg/L) at 100:1 ratio. Blue colour shows 0 mg/L, yellow colour shows 0.1 mg/L, green colour shows 1 mg/L, red colour shows 10 mg/L, and purple colour shows 100 mg/L. All the trend shows R value above 0.9.

**Table C.7: Showing Equation and R values of different parameters with NPs concentration.**

| Parameters                                                     | NPs Conc.      | Equation of linear model | Coefficient of determination (R <sup>2</sup> ) |
|----------------------------------------------------------------|----------------|--------------------------|------------------------------------------------|
| EPS-related protein vs metal on algal-bacteria consortium      | CuO only       | $Y=0.0054x+0.1609$       | 0.8749                                         |
|                                                                | ZnO only       | $Y=0.0062x+0.1467$       | 0.88                                           |
|                                                                | Mixture of NPs | $Y=0.005x+0.1564$        | 0.916                                          |
| EPS-related lipid vs metal on algal-bacteria consortium        | CuO only       | $Y=0.2823x+28.543$       | 0.901                                          |
|                                                                | ZnO only       | $Y=0.7723x+32.039$       | 0.9086                                         |
|                                                                | Mixture of NPs | $Y=0.8856x+27.088$       | 0.986                                          |
| EPS-related carbohydrate vs metal on algal-bacteria consortium | CuO only       | $Y=3.8919x+179.22$       | 0.9368                                         |
|                                                                | ZnO only       | $Y=3.5522x+179.91$       | 0.9395                                         |
|                                                                | Mixture of NPs | $Y=3.1038x+166.37$       | 0.9779                                         |
| CAT activity vs metal on algal-bacteria consortium             | CuO only       | $Y=2.674x+22.348$        | 0.9761                                         |
|                                                                | ZnO only       | $Y=2.6719x+26.639$       | 0.99                                           |
|                                                                | Mixture of NPs | $Y=0.9723x+14.102$       | 0.9655                                         |
| Chl a vs. CAT activity                                         | CuO only       | $Y=5.9368x+656.19$       | 0.9749                                         |
|                                                                | ZnO only       | $Y=5.3524x+684.56$       | 0.9528                                         |
|                                                                | Mixture of NPs | $Y=6.824x+742.56$        | 0.9974                                         |
| Chl b vs. CAT activity                                         | CuO only       | $Y=0.6682x+46.847$       | 0.8312                                         |
|                                                                | ZnO only       | $Y=0.7776x+42.808$       | 0.8205                                         |
|                                                                | Mixture of NPs | $Y=1.0598x+33.804$       | 0.901                                          |
| Carotenoid vs. CAT activity                                    | CuO only       | $Y=6.0438x+36.059$       | 0.9628                                         |
|                                                                | ZnO only       | $Y=5.331x+31.717$        | 0.9726                                         |
|                                                                | Mixture of NPs | $Y=4.352x+55.518$        | 0.9322                                         |
| lipid vs. CAT activity                                         | CuO only       | $Y=0.0149x+0.3174$       | 0.9613                                         |
|                                                                | ZnO only       | $Y=0.0157x+0.2432$       | 0.9733                                         |
|                                                                | Mixture of NPs | $Y=0.0143x+0.2523$       | 0.9278                                         |
| Carbohydrate vs. CAT activity                                  | CuO only       | $Y=0.0665x+0.309$        | 0.9688                                         |
|                                                                | ZnO only       | $Y=0.0689x+0.4527$       | 0.9569                                         |

|                                 |                |                     |        |
|---------------------------------|----------------|---------------------|--------|
|                                 | Mixture of NPs | $Y=0.00483x+0.8031$ | 0.9287 |
| Protein activity vs. CAT        | CuO only       | $Y=0.1221x+1.8812$  | 0.9763 |
|                                 | ZnO only       | $Y=0.113x+1.5996$   | 0.9784 |
|                                 | Mixture of NPs | $Y=0.0915x+2.0778$  | 0.9405 |
| Internal metal vs. CAT activity | CuO only       | $Y=2.674x+22.348$   | 0.9761 |
|                                 | ZnO only       | $Y=2.6179x+26.639$  | 0.99   |
|                                 | Mixture of NPs | $Y=1.0446x+6.4977$  | 0.9686 |

### 3.7. TEM

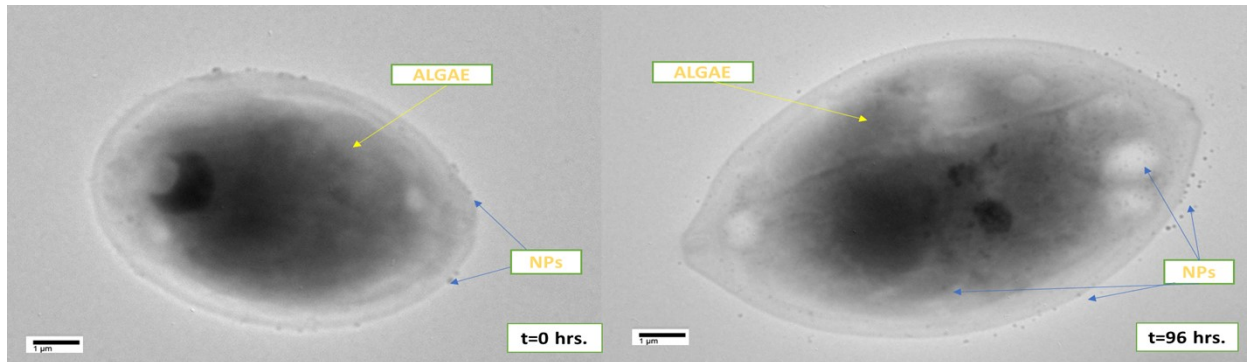

**Figure C.7.1: TEM image showing algae in OECD media at t=0 hrs and t=96 hrs. in the presence of mixture of nanoparticles at 100:1 ratio for 100 mg/L nanoparticle concentration.**

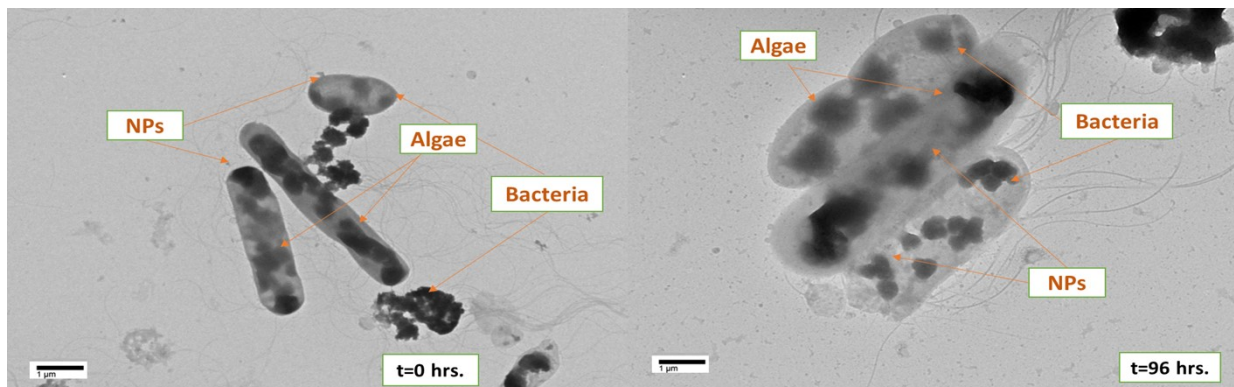

**Figure C.7.2: TEM image showing algae-bacteria consortia in OECD media at t=0 hrs and t=96 hrs. in the presence of ZnO nanoparticles at 100:1 ratio for 100 mg/L nanoparticle concentration.**

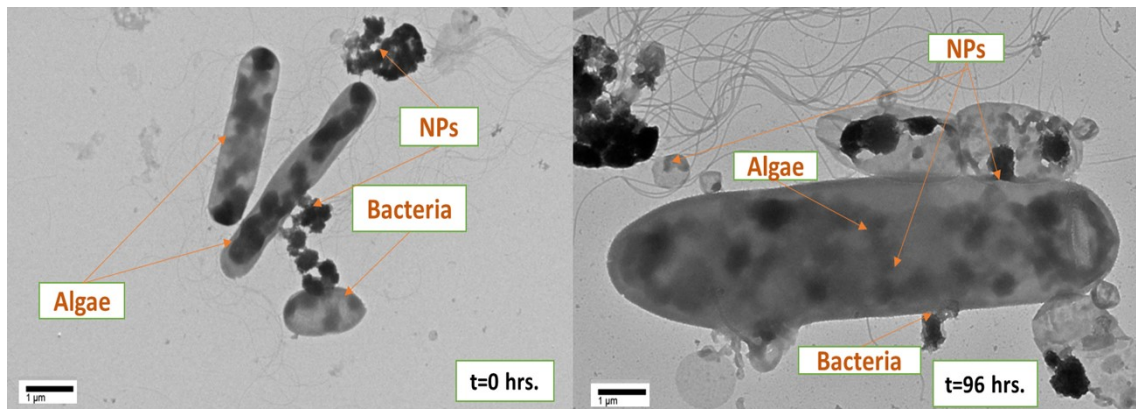

**Figure C.7.3: TEM image showing algae-bacteria consortia in OECD media at t=0 hrs and t=96 hrs. in the presence of ZnO nanoparticles at 100:1 ratio for 100 mg/L nanoparticle concentration.**

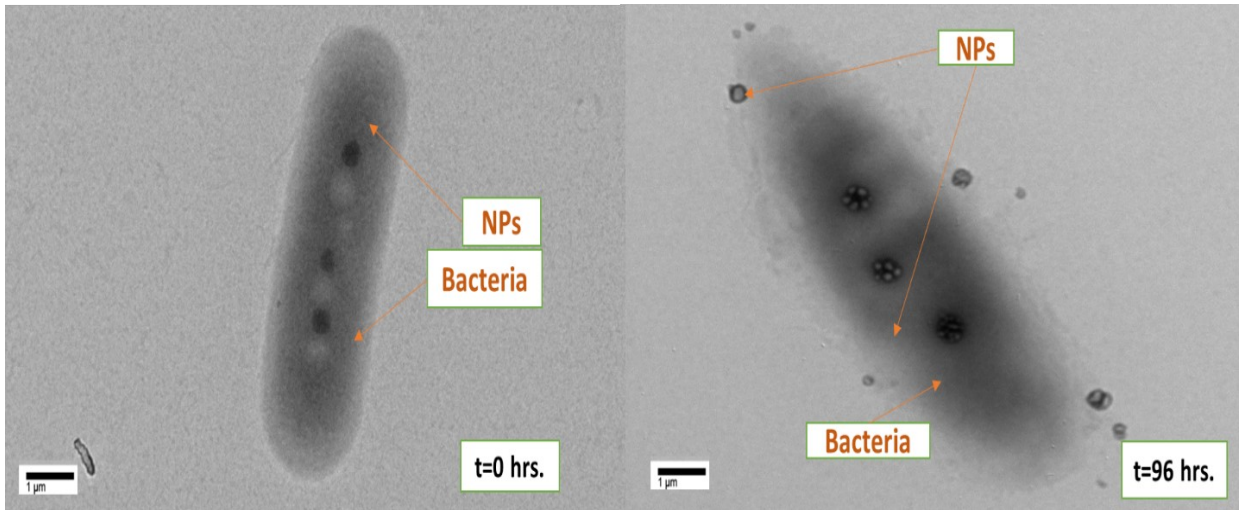

Figure C.7.4: TEM image showing bacteria at=0 hrs and t=96 hrs. in the presence of ZnO+CuO nanoparticles at 100:1 ratio for 100 mg/L nanoparticle concentration.

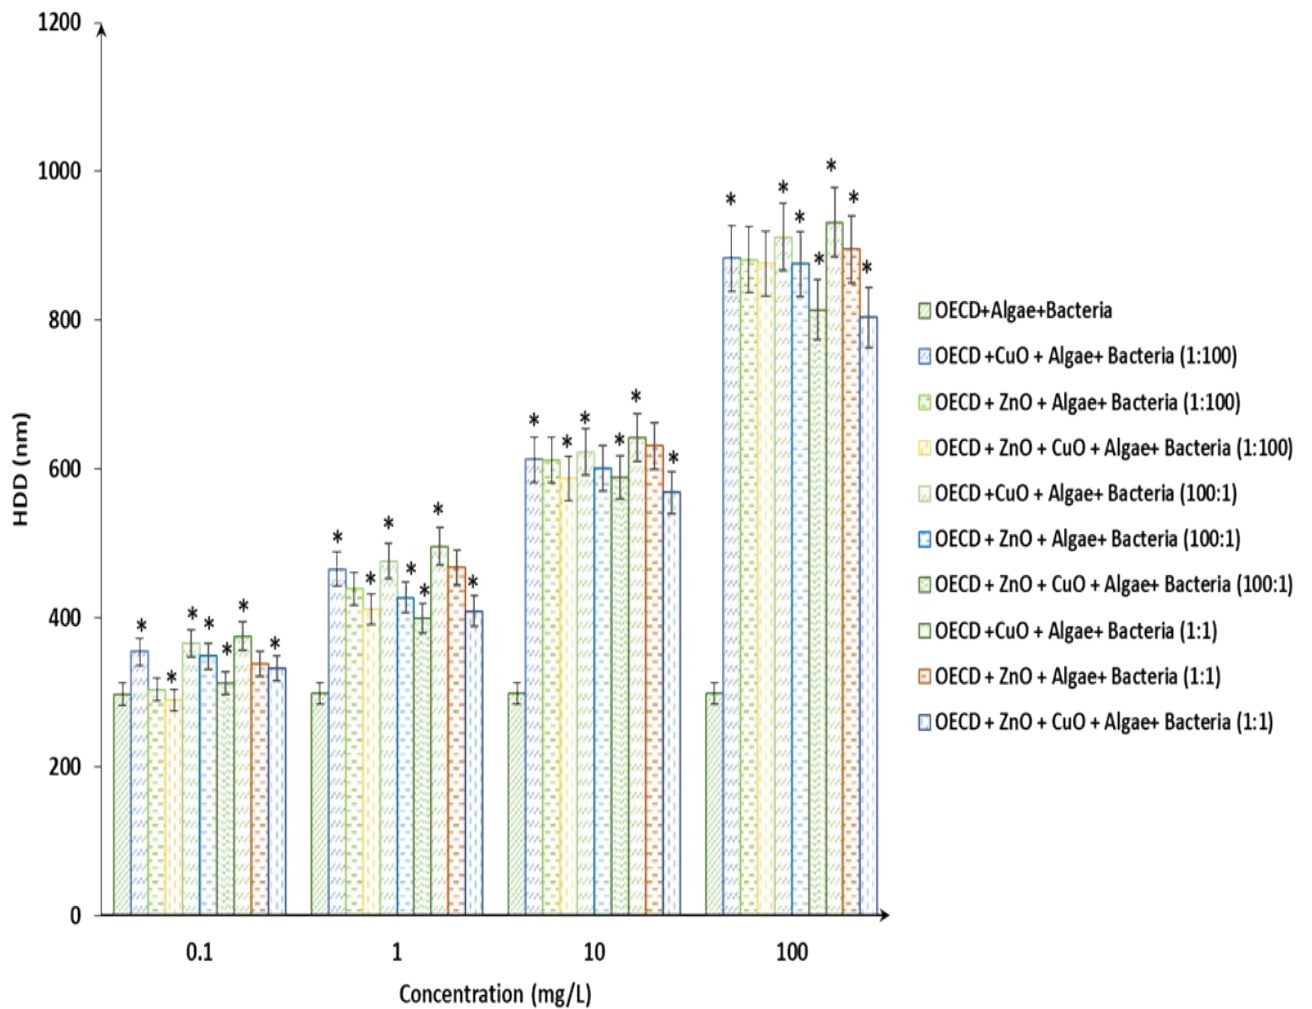

Figure C.7.5: HDD in the various samples containing algae+bacteria at different concentration (0, 0.1, 1, 10 and 100 mg/L) of ZnO, CuO and ZnO+CuO NPs in the OECD media at after 96 hours at different ratios. Error bars indicate one standard deviation value of three replicates around average values; \*: significance ( $p < 0.05$ )

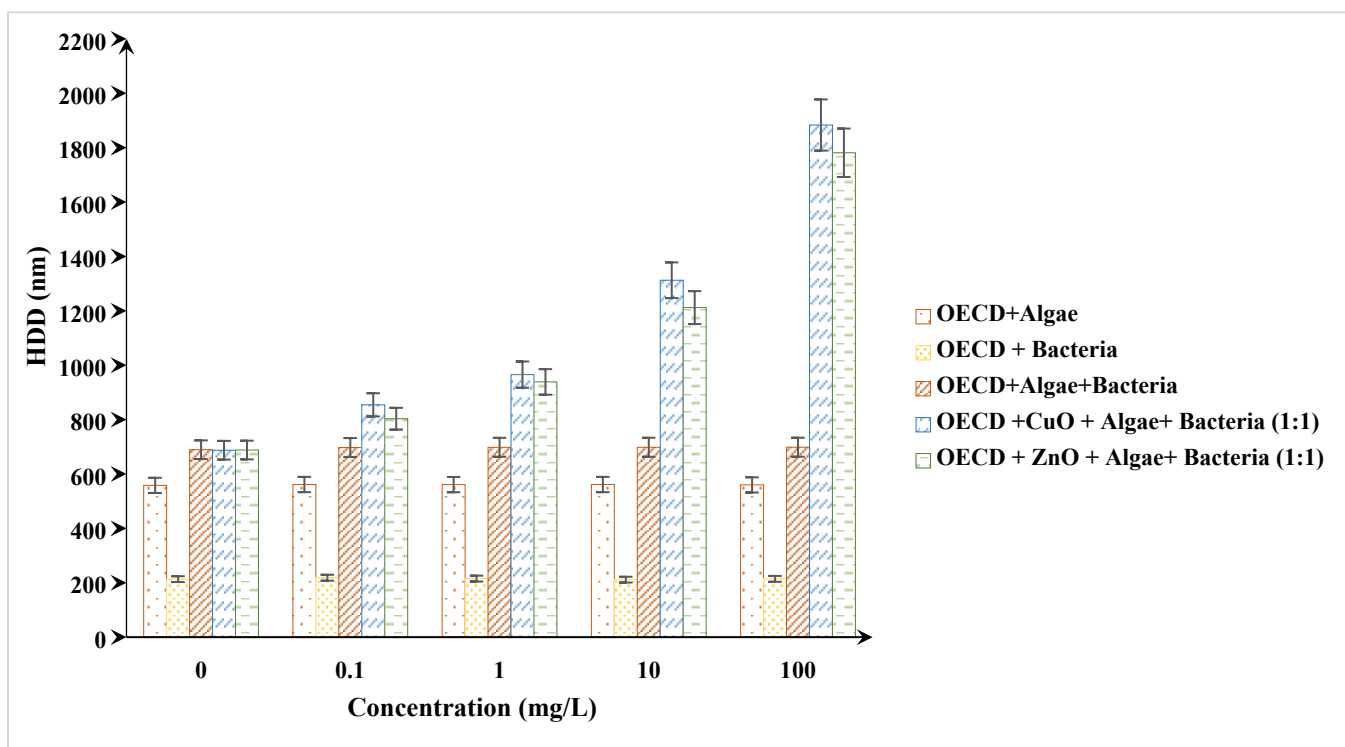

Figure C.7.6: HDD in the sample containing different concentrations of nanoparticles at algae-bacteria ratio (1:1).

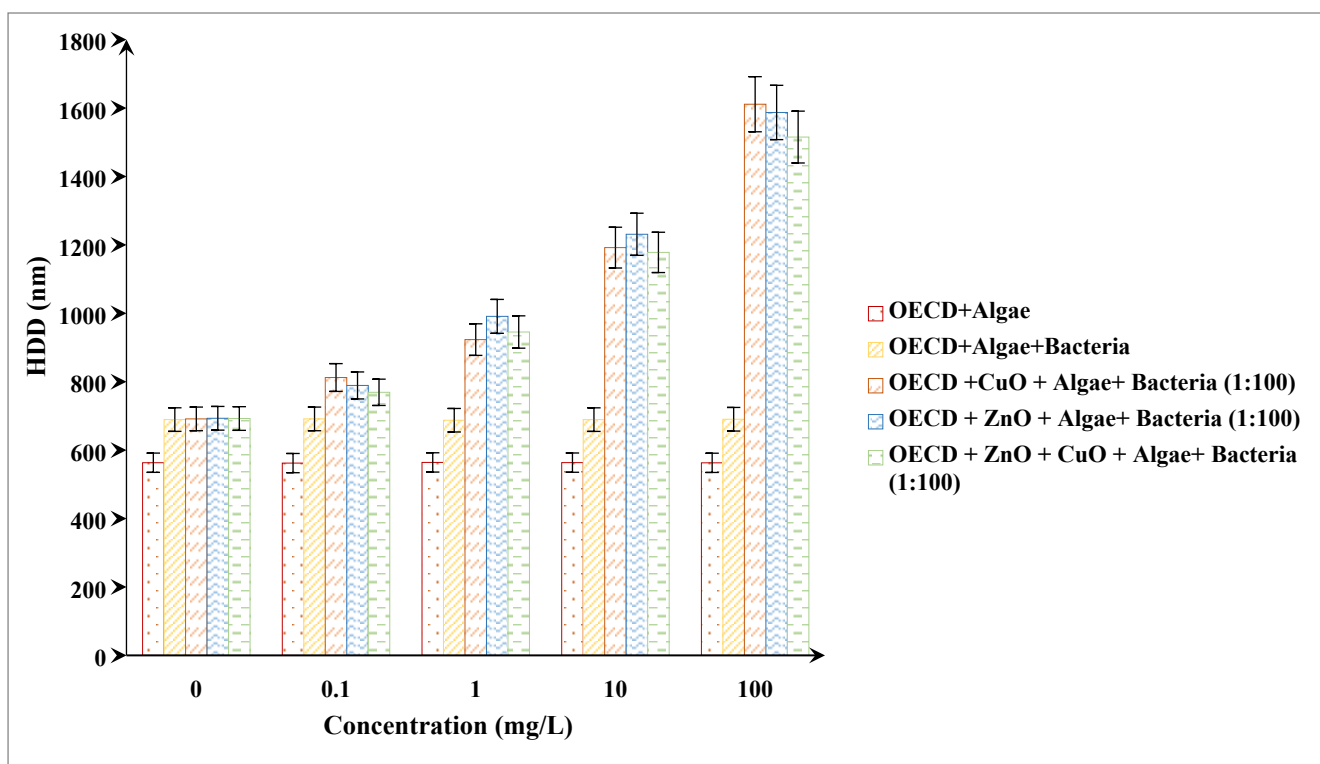

Figure C.7.7: HDD in the sample containing different concentrations of nanoparticles at algae-bacteria ratio (1:100).

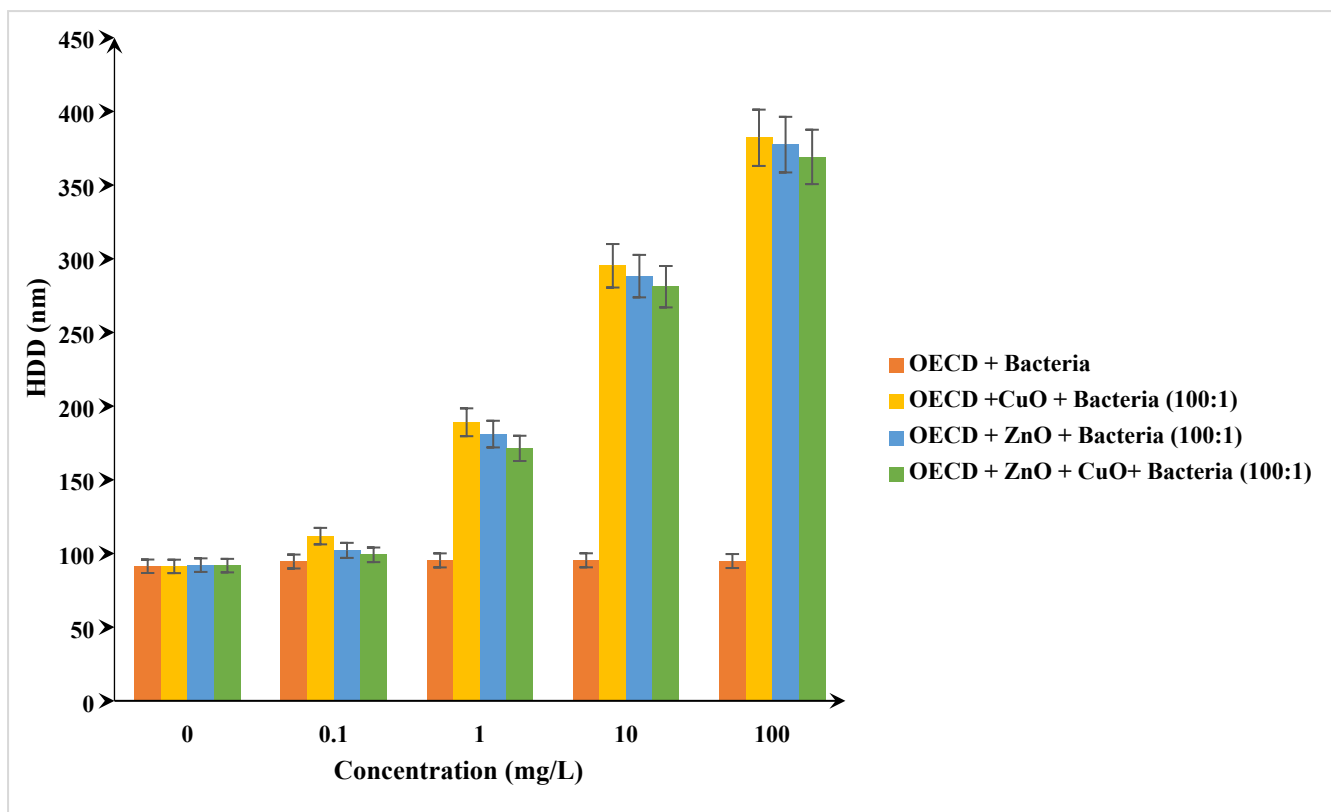

Figure C.7.8: HDD in the sample containing different concentrations of nanoparticles in bacteria alone.

Table C.8: Calculated values of rate constants of the kinetics of metal accumulation of algae-bacteria consortium after t=96 hours at 1 mg/L concentration (average and

| Nanoparticles presence | Total adsorption ( $k_{total}$ ) | Coefficient of determination of model fitting ( $R^2_{total}$ ) |
|------------------------|----------------------------------|-----------------------------------------------------------------|
| ZnO only               | 0.587±2.76                       | 0.932                                                           |
| CuO only               | 0.619±2.86                       | 0.956                                                           |
| Both types of NPs      | 0.449±1.93                       | 0.939                                                           |

standard deviation values are shown here).



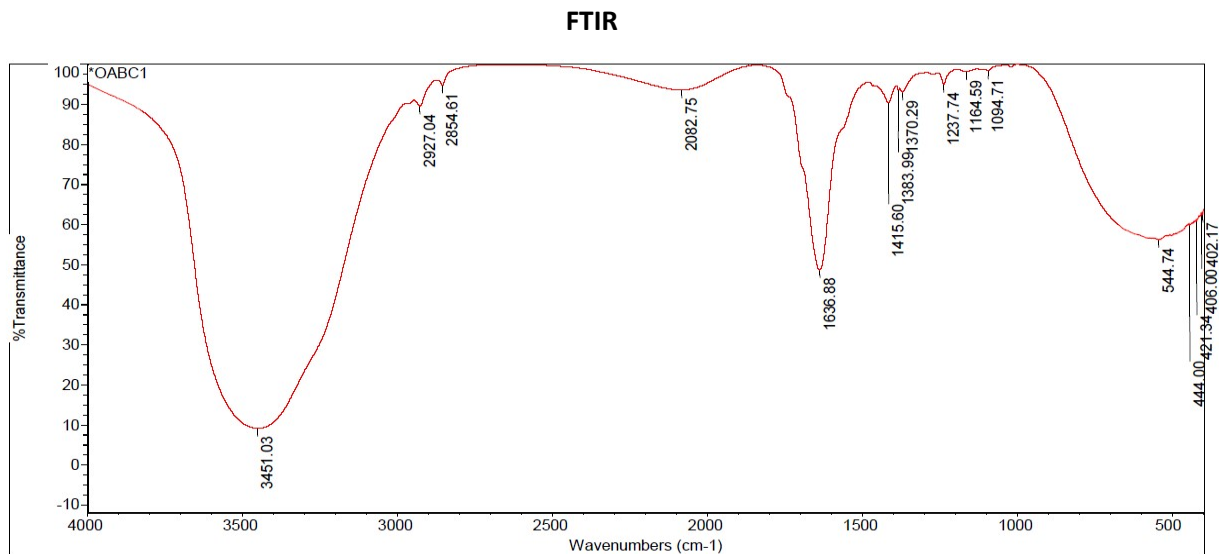

**Figure C.8.1: FTIR spectra in the sample containing no nanoparticles at algae-bacteria ratio (100:1).**

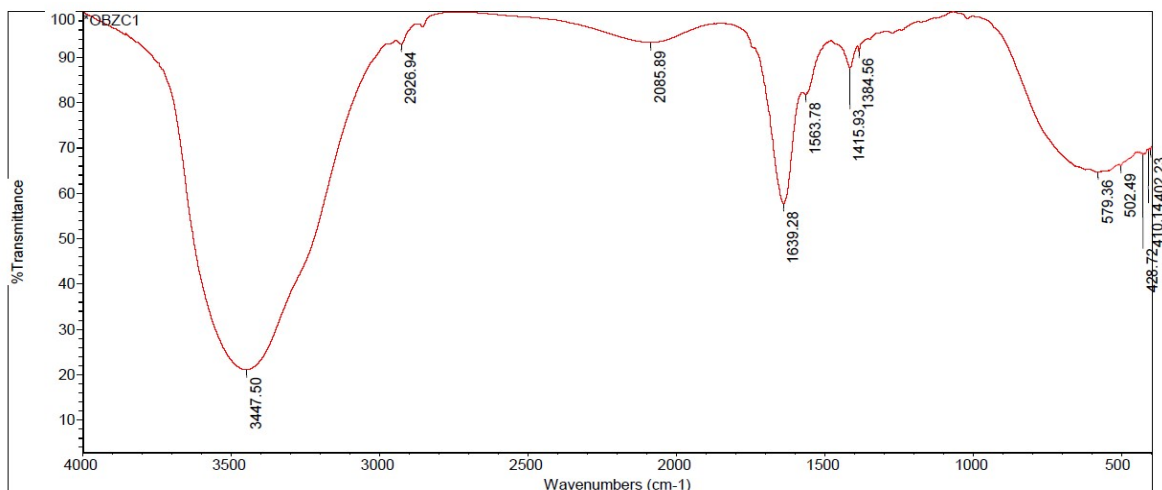

**Figure C.8.2: FTIR spectra in the sample containing 100 mg/L ZnO nanoparticles at algae-bacteria ratio (100:1).**



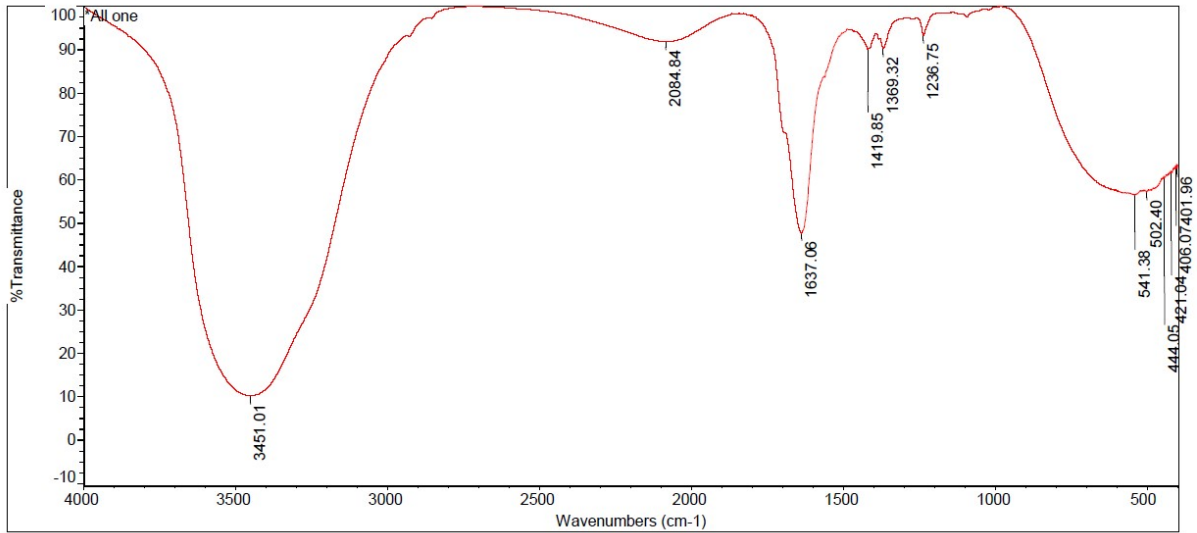

**Figure C.8.3: FTIR spectra in the sample containing 100 mg/L CuO nanoparticles at algae-bacteria ratio (100:1).**

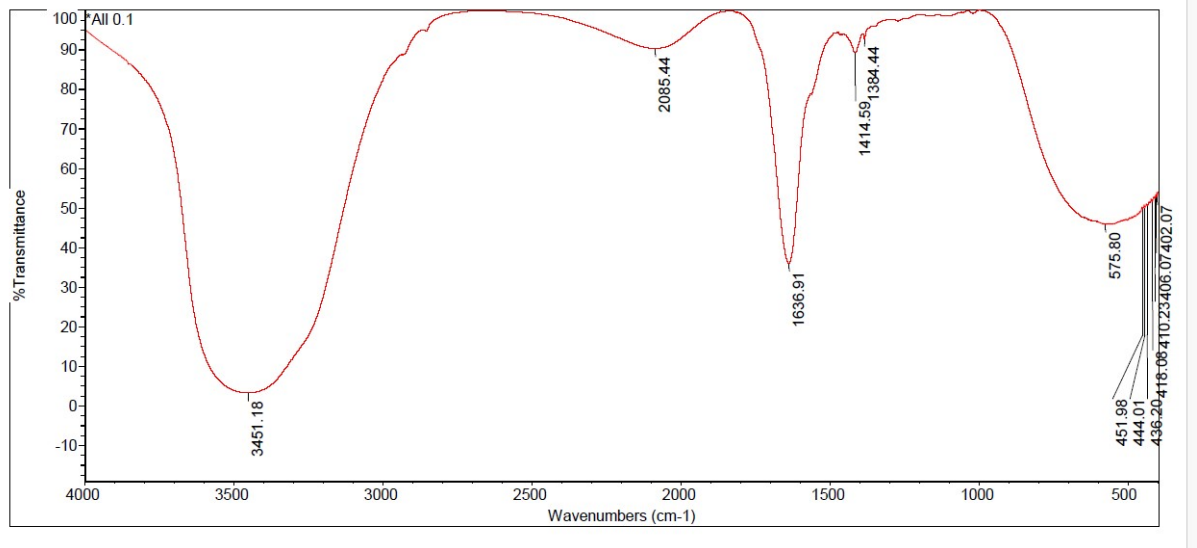

**Figure C.8.4: FTIR spectra in the sample containing 100 mg/L CuO+ ZnO mixture of nanoparticles at algae-bacteria ratio (100:1).**

**Table D.1: Shows the comparison table between the parameters analysed in the present study vs. various toxicity studies done in the past with mixture of NPs and algae alone. Shows the parameters which are analysed in the past.**

**MIXTURE OF NANOPARTICLES+ALGAE**

| Algal alone/Algae-Bacterial Species used                   | NPs                                                                          | Chl a | Chl b | Carotenoid | Cell Growth/<br>Cell Count | Biomass | Lipid | Protein | Chemical Bonding | Metal | Microscopic | Mechanism | References        |
|------------------------------------------------------------|------------------------------------------------------------------------------|-------|-------|------------|----------------------------|---------|-------|---------|------------------|-------|-------------|-----------|-------------------|
| <i>Chlorella vulgaris</i>                                  | ZnO,<br>CuO,<br>TiO <sub>2</sub> ,<br>NiO,<br>Fe <sub>2</sub> O <sub>3</sub> |       | No    | No         |                            | No      | No    | No      | No               | No    | No          | No        | Ko et al., 2018   |
| <i>Scenedesmus obliquus</i> ,<br><i>Chlorella vulgaris</i> | TiO <sub>2</sub><br>NPs;<br>TiO <sub>2</sub><br>NT                           | No    | No    | No         |                            | No      | No    | No      | No               | No    |             | No        | Wang et al., 2020 |
| <i>Scenedesmus obliquus</i>                                | ZnO,<br>GO                                                                   | No    | No    | No         |                            | No      | No    | No      | No               |       |             | No        | Ye et al., 2018   |

|                                                                  |                                                              |    |    |    |    |    |    |    |    |    |    |    |                         |
|------------------------------------------------------------------|--------------------------------------------------------------|----|----|----|----|----|----|----|----|----|----|----|-------------------------|
| <i>Chlorella</i> sp.                                             | TiO <sub>2</sub><br>(rutile<br>and<br>anatase<br>phases)     | No |    | No | Iswarya et al.,<br>2015 |
| <i>Chlamydomonas reinhardtii</i> and<br><i>Ochromonas danica</i> | AgNPs,<br>HemNPs,<br>PbNPs                                   | No |    | No | Huang et al., 2019      |
| <i>Scenedesmus obliquus</i>                                      | TiO <sub>2</sub> ,<br>ZrO <sub>2</sub> ,<br>SiO <sub>2</sub> |    |    |    | No | No | No | No | No | No |    | No | Liu et al., 2018        |
| <i>Chlorella pyrenoidosa</i>                                     | ENPs<br>(nCeO <sub>2</sub> )                                 | No | No | No |    | No | Wang et al., 2016       |

|                        |                                                                                      |  |    |    |  |    |    |    |    |  |  |    |                        |
|------------------------|--------------------------------------------------------------------------------------|--|----|----|--|----|----|----|----|--|--|----|------------------------|
|                        | 2 and<br>nTiO <sub>2</sub> )<br>, one<br>antibio<br>tic<br>(florfe<br>nicol,<br>FLO) |  |    |    |  |    |    |    |    |  |  |    |                        |
| <i>Picochlorum sp.</i> | ZnO<br>and<br>TiO <sub>2</sub><br>NPs                                                |  | No | No |  | No | No | No | No |  |  | No | Hazeem et al.,<br>2015 |

**BACTERIA+SINGLE/MIXTURE OF NANOPARTICLES**

| Bacteria alone | NPs | Cell Growth/<br>Cell Count | Biomass | Lipid | Protein | Chemical<br>Bonding | Metal | Toxicity test | Enzyme<br>Assay | Microscopic | Mechanism | References |
|----------------|-----|----------------------------|---------|-------|---------|---------------------|-------|---------------|-----------------|-------------|-----------|------------|
|                |     |                            |         |       |         |                     |       |               |                 |             |           |            |

|                                                                                              |      |    |    |    |    |    |    |  |  |    |    |                          |
|----------------------------------------------------------------------------------------------|------|----|----|----|----|----|----|--|--|----|----|--------------------------|
| <i>Pseudomonas aeruginosa</i><br><i>Staphylococcus aureus</i>                                | AgNP |    | No | No | No | No | No |  |  |    | No | Dorobantu et al., 2015   |
| <i>Escherichia coli</i> ,<br><i>Staphylococcus aureus</i>                                    | AgNP |    | No | No | No | No | No |  |  | No | No | Greulich et al., 2012    |
| <i>Shewanella oneidensis</i> ;<br><i>Bacillus subtilis</i>                                   | AuNP |    | No | No | No | No | No |  |  |    | No | Feng et al., 2015        |
| <i>Escherichia coli</i> ,<br><i>Staphylococcus aureus</i> ;<br><i>Pseudomonas aeruginosa</i> | ZnO  |    | No | No | No | No | No |  |  |    | No | Premanathan et al., 2010 |
| <i>E. coli</i>                                                                               | CuO  | No | No | No | No | No |    |  |  | No | No | Bondarenko et al.,       |

|                                                                                                   |                            |    |    |    |    |    |    |  |    |    |    |                     |
|---------------------------------------------------------------------------------------------------|----------------------------|----|----|----|----|----|----|--|----|----|----|---------------------|
|                                                                                                   |                            |    |    |    |    |    |    |  |    |    |    | 2012                |
| <i>Pseudomonas fluorescens</i> OS8;<br><i>E. coli</i> ;<br><i>Saccharomyces cerevisiae</i> BY4741 | AgNP                       | No | No | No | No | No | No |  |    |    | No | Ivask et al., 2014  |
| <i>Streptomyces</i>                                                                               | CuO                        |    | No | No | No | No |    |  |    |    | No | Liu et al., 2018    |
| <i>Staphylococcus aureus</i> ;<br><i>Escherichia coli</i> ;<br><i>Pseudomonas aeruginosa</i>      | CuO<br>and<br>ZnO<br>alone |    | No | No | No | No | No |  | No | No | No | Dadi et al., 2019   |
| <i>Staphylococcus aureus</i> ;<br><i>Pseudomonas aeruginosa</i>                                   | CuO                        |    | No | No | No | No |    |  |    |    | No | Janani et al., 2020 |

|                                                                                      |                                                |    |    |    |    |    |  |  |    |    |    |                            |
|--------------------------------------------------------------------------------------|------------------------------------------------|----|----|----|----|----|--|--|----|----|----|----------------------------|
| <i>Escherichia coli</i>                                                              | CuO                                            | No | No | No | No | No |  |  |    |    | No | Meghana et al., 2015       |
| <i>Streptococcus mutans;</i><br><i>Lactobacillus casei;</i> and <i>L acidophilus</i> | CuO                                            | No | No | No | No | No |  |  | No | No | No | Amiri et al., 2017         |
| <i>Escherichia coli</i>                                                              | ZnO                                            |    | No | No | No | No |  |  |    | No | No | Li et al., 2011            |
| <i>Sinorhizobium meliloti</i>                                                        | CeO <sub>2</sub><br>and<br>ZnO<br>NPs<br>alone |    | No | No | No | No |  |  |    |    | No | Bandyopadhyay et al., 2012 |
| <i>Vibrio fischeri</i>                                                               | ZnO<br>and<br>CuO<br>NPs                       | No | No | No | No | No |  |  | No | No | No | Zhang et al., 2020         |

|                              |                                                                       |    |    |    |    |    |  |  |    |    |    |                   |
|------------------------------|-----------------------------------------------------------------------|----|----|----|----|----|--|--|----|----|----|-------------------|
|                              | mix                                                                   |    |    |    |    |    |  |  |    |    |    |                   |
| <i>Escherichia coli</i>      | ZnO<br>and<br>CuO<br>NPs<br>mix                                       | No | No | No | No | No |  |  | No | No | No | Tong et al., 2015 |
| <i>Nitrosomonas europaea</i> | n-<br>TiO <sub>2</sub> ,<br>n-<br>CeO <sub>2</sub> ,<br>and n-<br>ZnO |    | No | No | No | No |  |  |    |    | No | Yu et al., 2016   |

**ALGAE-BACTERIA CONSORTIA+SINGLE/MIXTURE OF NANOPARTICLES**



| Bacteria alone                                                                                                                                           | NPs | Contaminant                                           | Cell Growth/<br>Cell Count | Biomass | Lipid | Protein | Chemical<br>Bonding | Metal | Toxicity test | Enzyme<br>Assay | Microscopic | Mechanism | References                          |
|----------------------------------------------------------------------------------------------------------------------------------------------------------|-----|-------------------------------------------------------|----------------------------|---------|-------|---------|---------------------|-------|---------------|-----------------|-------------|-----------|-------------------------------------|
| <i>AgNP</i> and<br><i>HemNP</i> tagged<br>bacteria with<br><i>Chlorella</i><br><i>pyrenoidosa</i>                                                        | No  | Antibiotic                                            | No                         | No      | No    | No      | No                  | No    | No            |                 | No          | No        | Cao et al, 2023                     |
| <i>Bacillus sp.</i> and<br><i>Micrococcus sp</i><br>(Bacteria) and.<br><i>Scenedesmus</i><br><i>acutus</i> and<br><i>Chlorella</i><br><i>pyrenoidosa</i> | No  | Heavy<br>metal<br>Pb <sup>2+</sup> +Cd <sup>2+s</sup> |                            | No      | No    |         |                     |       |               | No              |             | No        | Chandrashekharaiiah<br>et al., 2022 |
| <i>Chlorella</i><br><i>vulgaris</i> and                                                                                                                  | No  | Antibiotics                                           |                            | No      | No    | No      | No                  | No    | No            |                 | No          | No        | Zhou et al., 2023                   |

|                                                        |    |              |    |    |    |    |    |    |    |  |  |    |                   |
|--------------------------------------------------------|----|--------------|----|----|----|----|----|----|----|--|--|----|-------------------|
| <i>Bacillus subtilis</i>                               |    |              |    |    |    |    |    |    |    |  |  |    |                   |
| <i>Chlorella vulgaris</i> and <i>Bacillus subtilis</i> | No | Tetracycline | No |  |  | No | Zhou et al., 2023 |

**Table 4: Various studies showing algae-bacteria consortia at different water matrix.**

| Reference               | Algae/bacteria Information                                                                                                                                     | Matrix                         | Findings                                                                                                                                                | Parameters observed                                                                                             | Remarks/ Limitations                                                         |
|-------------------------|----------------------------------------------------------------------------------------------------------------------------------------------------------------|--------------------------------|---------------------------------------------------------------------------------------------------------------------------------------------------------|-----------------------------------------------------------------------------------------------------------------|------------------------------------------------------------------------------|
| Han et al. (2016)       | <b>Bacteria:</b> <i>Muricauda sp.</i><br><b>Axenic microalga:</b> <i>Tetraselmis chuii</i> , <i>Cylindrotheca fusiformis</i> & <i>Nannochloropsis gaditana</i> | Wastewater                     | Microalgae-bacteria co-cultures effective strategy for microalgal cultivation under mixotrophic conditions. Algal cell density increases with bacteria. | Growth curve, algae-bacteria ratio, plating                                                                     | No data on the Toxicity of NPs; Only growth studies done.                    |
| Berthold et al. (2019)  | <b>Algae:</b> <i>Characium sp.</i><br><b>Bacteria:</b> <i>Pseudomonas composti</i>                                                                             | BG-11 media                    | bacteria release of unidentified extracellular compounds which might affect the growth rate and lipid metabolism of algae.                              | Biomass, Lipid, FAME, Molecular phylogenetic analyses                                                           | No data on toxicity of NPs; Mechanism unexplored.                            |
| Ferro et al. (2019)     | <b>algal strain:</b> <i>Chlorella vulgaris</i><br><b>Bacteria:</b> <i>Rhizobium sp.</i>                                                                        | Synthetic Municipal Wastewater | Culture stability along with high nutrient removal capacity even at HRTs of 5 and 3 days                                                                | Biomass, Specific growth rate, O <sub>2</sub> , CO <sub>2</sub> , N <sub>2</sub> , Lipid, Protein, carbohydrate | No data of Toxicity of NPs.                                                  |
| Thøgersen et al. (2018) | <b>Alga</b> <i>Emiliania huxleyi</i><br><b>bacterium</b> <i>Phaeobacter inhibens</i> DSM17395                                                                  | Growth Media                   | The presence of the alga facilitated the attachment of the bacterium to a surface                                                                       | DNA isolation, PCR, Fluorescence tagging                                                                        | No data of Toxicity of NPs; Only growth study                                |
| Ashok et al. (2014)     | <b>Algal-bacterial consortia.</b> <i>Chlorella vulgaris</i> . <i>Chlamydomonas reinhardtii</i>                                                                 | Synthetic wastewater           | Almost 90 % removal of Nitrogen and Phosphorus and 80% of COD (2-day HRT)                                                                               | Temp., pH, chl a, biomass, nitrogen, phosphorus, polysaccharides, alkalinity.                                   | condition optimum for OECD condition or mixture of NPs                       |
| Holmes et al. (2019)    | <b>Bacteria-</b> <i>Escherichia coli</i><br><b>Algae-</b> <i>Auxenochlorella protothecoides</i>                                                                | Simulated wastewater           | In cocultures with algae, minimal or no acetate was observed; COD removal up to 66% faster than <i>E. coli</i> in co-culture.                           | Culture growth, qPCR, organic acid analysis                                                                     | No data on toxicity of NPs; no consideration for mixture of NPs              |
| Cao et al. (2019)       | <b>Algae:</b> <i>Isochrysis galbana</i><br><b>Bacteria:</b> <i>Pseudomonas stutzeri</i>                                                                        | NMB3 media                     | Decrease in the chlorophyll contents by 23–74% in co-culture as compared with the axenic culture in the period of 6 days.                               | Growth, chl via fluorescence, DNA extraction, PCR,                                                              | No NPs toxicity; no information at cellular levels (EC <sub>50</sub> , etc). |
| Segev et al (2016)      | <b>Algae:</b> <i>Emiliania huxleyi</i><br><b>Bacteria:</b> <i>Phaeobacter Inhibens</i>                                                                         | Growth media                   | Naked algal cells covered by bacteria attached via their poles; Over time more attachment of algae with bacteria in co-culture conditions               | Growth profile, flow cytometry, fluorescence, SEM, chl a, cell analysis.                                        | No toxicological studies on co-culture; no toxicity study due to NPs         |
| Fie et al (2019)        | <b>Bacteria:</b> <i>R. radiobacter</i><br><b>Algae:</b> <i>C. variabilis</i> .                                                                                 | Growth media                   | <i>R. radiobacter</i> -derived nitrogen stimulates fatty-acid oxidation in <i>C. variabilis</i> and promotes its growth                                 | Growth profile, nitrogen, carbon, FAMES.                                                                        | No toxicity studies; no consideration for OECD conditions                    |

|                                |                                                                                                  |                                  |                                                                                                                                                                                                                                                                                            |                                                                                          |                                |
|--------------------------------|--------------------------------------------------------------------------------------------------|----------------------------------|--------------------------------------------------------------------------------------------------------------------------------------------------------------------------------------------------------------------------------------------------------------------------------------------|------------------------------------------------------------------------------------------|--------------------------------|
| Lepine et al. (2018)           | <i>Chlorella spp.</i>                                                                            | Industrial wastewater            | A microalgae-bacteria consortium was grown in a mixture of industrial wastewater.                                                                                                                                                                                                          | Cell count, pH, growth, Lipid, FAME,                                                     | No NPs-related toxicity study  |
| Grover et al. (2020)           | <i>C. vulgaris with Nitrobacter</i>                                                              | Growth media                     | Co-culturing enhanced growth (w/ increased cellular composition and biomass content)                                                                                                                                                                                                       | Growth profile, cell count, biomass                                                      | No NPs-related toxicity study  |
| Contreras-Angulo et al. (2019) | <i>Co-culture of Azospirillum brasilense and Scenedesmus sp.</i>                                 | Growth media                     | Symbiotic co-culturing of microalgae-bacteria on nitrogen-deficient media enhancing microalgae size and biomass biofuels.                                                                                                                                                                  | Biomass, cell size, protein carbohydrate, fatty acids, nitrogen                          | No NPs-related toxicity study  |
| Zhou et al. (2020)             | <i>Chlorella pyrenoidosa; Bacteria: High-efficient ammonia-oxidizing strain FN5</i>              | Antibiotic containing Wastewater | FN5 enhanced biomass concentration and lipid content of microalga <i>Chlorella pyrenoidosa</i> ; <i>Chlorella pyrenoidosa-FN5</i> culture removed NH <sub>3</sub> -N and accumulated lipid                                                                                                 | Enzyme activity (SOD, MDA, CAT), SEM, EPS, IAA, Nitrogen removal, Phosphate, COD removal | No NPs-related toxicity study  |
| Verma et al. (2020)            | <i>Algae: Chlorella sp. Activated sludge</i>                                                     | Lakewater                        | Removals of 93% nitrates, 99% phosphates, and 73% COD; maximum biomass content =7.8g/L                                                                                                                                                                                                     | Microalgal growth, biomass, SEM, COD, FTIR, nutrient removal                             | No NP-related toxicity studies |
| Xie et al. (2020)              | <i>Microalgal strain C. saccharophila bacterium C. pealriver</i>                                 | Growth media                     | <i>Chlorella saccharophila</i> was grown in bioreactor while a xylanolytic bacterium <i>Cellvibrio pealriver</i> ; During the CTS strategy, the co-cultivation using xylan as feedstock                                                                                                    | Microbial growth, SEM, total nitrogen concentration, lipid.                              | No NPs-related toxicity study  |
| Xu et al. (2021)               | <i>C. vulgaris, S. obliquus, Spirulina platensis Aerobic activated sludge</i>                    | Raw municipal wastewater         | Nutrient removal was increased; season- dependent nutrient removal; Aeration helps in the removal efficiency.                                                                                                                                                                              | Wastewater characteristics, biomass, pH, DO, N, P, plate count, TSS, Growth kinetics.    | No NPs-related toxicity study  |
| Loria et al. (2021)            | <i>C. vulgaris, C. sorokiniana, S. dimorphus, Neochloris oleoabundans; Activated sludge (AS)</i> | Growth media, sludge             | Several microalgal taxa bio flocculated with AS within 2 h; P removal was inconsistent in <i>C. vulgaris</i> and <i>N. oleoabundans</i> reactors, but stable and high in <i>S. dimorphus</i> in SBR reactors, though <i>S. dimorphus</i> reactors also exhibited the poorest settleability | Biomass, lipid, TSS, growth profile, nitrogen, phosphorous, DO                           | No NPs-related toxicity study  |
| Huo et al. (2020)              | <i>Algae Chlorella sp. Bacteria: Bacillus firmus and Beijerinckia fluminensis</i>                | Vinegar production Wastewater    | Nutrient removal rates were significantly increased after adding bacteria cultures; <i>B. fluminensis</i> enhanced the pigment content of <i>Chlorella sp.</i> ; Co-culturing had more notable effect on fatty acid composition rather than oil content.                                   | TN, TFA, Cell count, TN, TP, COD, Lipid, Fatty acid                                      | No NPs-related toxicity study  |

|                       |                                                                                                                                                                                                                                                                |                      |                                                                                                                                                                                                                                                                                                                                                |                                                                                       |                                     |
|-----------------------|----------------------------------------------------------------------------------------------------------------------------------------------------------------------------------------------------------------------------------------------------------------|----------------------|------------------------------------------------------------------------------------------------------------------------------------------------------------------------------------------------------------------------------------------------------------------------------------------------------------------------------------------------|---------------------------------------------------------------------------------------|-------------------------------------|
| Mujtaba et al. (2017) | <b>microalga <i>Chlorella vulgaris</i>; bacterium <i>Pseudomonas putida</i>.</b>                                                                                                                                                                               | Municipal wastewater | higher removal of both nutrients and COD in coculture than each axenic culture; the best removal performance with suspended <i>P. putida</i> and immobilized <i>C. vulgaris</i>                                                                                                                                                                | TP, TN, COD, TOC, TSS, Cell growth, wastewater characterization                       | No NPs-related toxicity study       |
| Xu et al. (2021 b)    | <b><i>Chlorella vulgaris</i>, <i>Scenedesmus obliquus</i>, <i>Spirulina platensis</i></b>                                                                                                                                                                      | Municipal wastewater | In the summer & autumn seasons high removal rates and biomass production percentages, the highest specific growth rate was 0.46 d <sup>-1</sup> ; the highest TN removal rate was 2.34 d <sup>-1</sup> ; and the highest TSS removal efficiency was 96.3 ± 2.1%.                                                                               | Biomass, plate count, COD, pH, DO, TP, TN, nutrient removal kinetics, growth kinetics | No NPs-related study                |
| Xu et al. (2021 a)    | <b>Algae: <i>Chlorella vulgaris</i> Bacteria: <i>Bacillus</i>.</b>                                                                                                                                                                                             | Growth media         | Two bacterial strains of different genera were isolated from <i>Chlorella vulgaris</i> ; <i>Bacillus</i> strain improved algae growth, photosynthesis, and nutrient removal; 7-day optimal co-culturing conditions with 10:1 bacteria-to-microalgae ratio                                                                                      | Biomass, cell count. Nutrient removal, growth kinetics, chl a                         | No NPs-related toxicity study       |
| Tao et al. (2020)     | <b><i>Chlorella sp. and Bacillus simplex</i></b>                                                                                                                                                                                                               | Growth media         | Consortium improved phenol degradation efficiency and <i>Chlorella sp.</i> Growth                                                                                                                                                                                                                                                              | Cell count, growth kinetics, phenol degradation                                       | No NPs-related toxicity study       |
| Li et al. (2021)      | <b><i>Scenedesmus obliquus and Bacillus megaterium</i></b>                                                                                                                                                                                                     |                      | Co-culture was found more efficient in treating high-concentration biogas slurry compared with the pure microalgae culture, reducing various nutrients in biogas slurry and simultaneously accumulating biomass with higher biofuel characteristics.                                                                                           | Biomass, cell growth, chl a, chl b, lipid, TP, TN, COD, etc.                          | No NPs-related toxicity studies     |
| Wang et al. (2021)    | <b>Monoculture and co-culture of algae (<i>Chlorella vulgaris</i>) and bacteria (activated sludge)</b>                                                                                                                                                         | Swine manure         | When co-cultivated, the algal growth and precipitation (harvest) were promoted, while aerobic bacteria growth was initially promoted, and then inhibited.                                                                                                                                                                                      | Biomass, pH, TN, COD, DO, cell count, SEM, DNA, Biomass settling efficiency           | NPs toxicity was not studied.       |
| Wang et al., 2022     | <b>Algae-bacteria consortia (ABC) in activated sludge</b>                                                                                                                                                                                                      | Cooking wastewater   | ABC reactors show satisfactory removal ability. ABC can secrete large EPS to protect themselves and form flocs with good sedimentation performance under toxic and refractory organic wastewater stress.                                                                                                                                       | COD, TN, pH, SS, biomass, EPS, BOD, chl a                                             | NPs toxicity not discussed          |
| Rossi et al., 2022    | <b><i>Chlorellaceae</i> (1·10<sup>6</sup> cell·mL<sup>-1</sup>), <i>Scenedesmaceae</i> (0.2·10<sup>6</sup> cell·mL<sup>-1</sup>), and <i>Chlamydomonadaceae</i> (0.2·10<sup>6</sup> cell·mL<sup>-1</sup>); bacterial culture: heterotrophs and nitrifiers.</b> | Piggery wastewater   | Removal of NH <sub>4</sub> <sup>+</sup> , PO <sub>4</sub> <sup>3-</sup> (90%), and COD (59%), with 10.7 g/m <sup>2</sup> /d biomass productivity. The process allowed to reduce the nitrogen spread to arable land by 77%, by increasing the nitrogen valorised as biofertilizers/ bio stimulants and the nitrogen released to the atmosphere. | TSS, TAN, COD, Biomass, chl a, FDA, SEM.                                              | NPs were not present in this study. |
| Xu et al., 2023       | <b><i>Cladophora</i>, activated sludge</b>                                                                                                                                                                                                                     | Wastewater           | The addition of microorganisms increases the                                                                                                                                                                                                                                                                                                   | DO, biomass, TN, TP,                                                                  | NPs not studied.                    |

|                    |                                                                                                     |                                                                 |                                                                                                                                                                                                                                                                                                     |                                                              |                                 |
|--------------------|-----------------------------------------------------------------------------------------------------|-----------------------------------------------------------------|-----------------------------------------------------------------------------------------------------------------------------------------------------------------------------------------------------------------------------------------------------------------------------------------------------|--------------------------------------------------------------|---------------------------------|
|                    |                                                                                                     | <b>Toxicant:</b><br>atrazine                                    | removal efficiency of TN in atrazine-containing wastewater by 43.70%, and the addition of Cladophora further increased by 3.82%. The protein signal produced by the microbial release of EPS triggered the algal resistance mechanism and approximately 3% more in the algae-bacteria consortia.    | COD, chl a, chl b, SOD, POD, MDA, EPS.                       |                                 |
| Cheng et al., 2022 | <i>Laboratory-grown algae and bacteria from activated sludge</i>                                    | Municipal wastewater                                            | A new type of algae-bacteria biofilm reactor (ABBR) was designed. ABBR allowed a marked improvement on the removals of IMI, TDN, TDP, and cod during the 16-day operation. Meanwhile, more IMI degradation products were found in PBR while lower biological toxicity was detected in ABBR.         | pH, TDS, TN, ICP-MS, biomass,                                | NPs presence was absent.        |
| Wang et al., 2023  | <i>Trebouxiophyceae, Saccharimonadales, Propionibacteriaceae, Propioniciclav a, and Micropruina</i> | Municipal wastewater<br><b>Toxicant:</b><br>NPs, abiotic stress | The addition of algae led to an increase in sedimentation performance, biomass, and EPS. The AEBC had a maximum 77.15 % removal rate of C, 63.22 % of N, and 82.54 % of P, respectively. The effluent of algae-enhanced reactors suggested that algae had significant effects on pollutant removal. | Total DNA, PCR, SEM, biomass, chl a, chl b, carotenoid, PCA. | No NPs were used in this study. |
